# 1 Lactoferricins access the cytosol of 2 *Escherichia coli* within few seconds

3 **Enrico F. Semeraro**<sup>1,2,3\*</sup>, **Lisa Marx**<sup>1,2,3</sup>, **Johannes Mandl**<sup>1,2,3</sup>, **Ilse Letofsky-Papst**<sup>4</sup>,  
4 **Claudia Mayrhofer**<sup>5</sup>, **Moritz P. K. Frewein**<sup>1,2,3,6</sup>, **Haden L. Scott**<sup>7,8</sup>, **Sylvain Prévost**<sup>6</sup>,  
5 **Helmut Bergler**<sup>1,2,3</sup>, **Karl Lohner**<sup>1,2,3</sup>, **Georg Pabst**<sup>1,2,3\*</sup>

\*For correspondence:

[enrico.semeraro@uni-graz.at](mailto:enrico.semeraro@uni-graz.at) (EFS);  
[georg.pabst@uni-graz.at](mailto:georg.pabst@uni-graz.at) (GP)

6 <sup>1</sup>University of Graz, Institute of Molecular Biosciences, NAWI Graz, 8010 Graz, Austria;  
7 <sup>2</sup>BioTechMed Graz, 8010 Graz, Austria; <sup>3</sup>Field of Excellence BioHealth – University of  
8 Graz, Graz, Austria; <sup>4</sup>Institute of Electron Microscopy and Nanoanalysis and Center for  
9 Electron Microscopy, Graz University of Technology, NAWI Graz, 8010 Graz, Austria;  
10 <sup>5</sup>Center for Electron Microscopy, 8010 Graz, Austria; <sup>6</sup>Institut Laue-Langevin, 38043  
11 Grenoble, France; <sup>7</sup>Center for Environmental Biotechnology, University of Tennessee,  
12 Knoxville, Tennessee; <sup>8</sup>Shull Wollan Center, Oak Ridge National Laboratory, Oak Ridge,  
13 Tennessee

---

## 15 Abstract

16 We report the real-time response of *E. coli* to lactoferricin-derived antimicrobial peptides (AMPs)  
17 on length-scales bridging microscopic cell-sizes to nanoscopic lipid packing using millisecond  
18 time-resolved synchrotron small-angle X-ray scattering. Coupling a multi-scale scattering data  
19 analysis to biophysical assays for peptide partitioning revealed that the AMPs rapidly saturate the  
20 bacterial envelope and reach the cytosol within less than three seconds—much faster than  
21 previously considered. Final cytosolic AMP concentrations of ~ 100 mM suggest an efficient  
22 shut-down of metabolism as primary cause for bacterial killing. On the other hand, the damage  
23 of the cell envelope is a collateral effect of AMP activity that does not kill the bacteria. This implies  
24 that the impairment of the membrane barrier is a necessary but not sufficient condition for  
25 microbial killing by lactoferricins. The most efficient AMP studied exceeds others in both speed of  
26 reaching cytoplasm and lowest cytosolic peptide concentration.

---

## 28 Introduction

29 Progress in designing antibiotics with novel key-lock mechanisms is not keeping pace with the  
30 worldwide growing number of (multi) resistant bacterial strains, encouraging significant research  
31 efforts in promising alternatives such as antimicrobial peptides (AMPs) (*Lohner, 2001*). AMPs are  
32 part of the natural innate immune system and provide a first line of defence against pathogens.  
33 Their advantage as compared to conventional antibiotics relies on a rapid impairment of the barrier-  
34 function of the bacterial envelope by unspecific physical interactions, often coupled to an ensuing  
35 targeting of bacterial DNA or ribosomes [for review see, e.g., *Wimley and Hristova (2011); Lohner*  
36 *(2017); Malanovic et al. (2020)*].

37 Membrane-active AMPs contain specific sequences of cationic and apolar amino-acids, grant-  
38 ing high affinity to the hydrophobic core of lipid membranes and selectivity towards the negatively  
39 charged surfaces of bacterial envelopes. However, despite intense research for several decades,  
40 a comprehensive understanding of the specific series of events that pertain to the bactericidal or  
41 bacteriostatic activity of AMPs is still elusive. To large extent this is due to the persisting challenge of

42 merging results from *in vitro* studies with those obtained from lipid membrane mimics, often lead-  
43 ing to significant controversies (*Wimley and Hristova, 2011*). This is nurtured, on the one hand, by  
44 difficulties in engineering lipid model systems of sufficiently high complexity to mimic the diverse  
45 physicochemical properties of bacterial membranes. On the other hand, the complexity of live bac-  
46 teria challenges experimental and computational techniques to obtain quantitative results on the  
47 molecular level. For example, cryogenic transmission electron microscopy (TEM) provides high sub-  
48 cellular spatial resolution, but might give misleading information due to artefacts that potentially  
49 originate from staining or invasive sample preparation. Moreover, structural kinetics occurring in  
50 the seconds time scale are yet not accessible to cryo-TEM on cells, but would be needed to unravel  
51 the sequence of events induced by AMP activity. High-speed atomic force microscopy, for example,  
52 showed that a corrugation of the outer surface of live bacteria occurred about as fast as the intrin-  
53 sic time resolution of the experiment, i.e., within the first 13 seconds after addition of the AMP  
54 (*Fantner et al., 2010*). However, such experiments do not provide insight on concurring intracellu-  
55 lar changes. Video fluorescence microscopy provides the appropriate spatiotemporal resolution to  
56 differentiate AMP activity in different cells within several tens of seconds [see *Choi et al. (2016)* for  
57 review]. By combining fluorescence labeling schemes for peptides or cellular content, it has been  
58 reported that peptides preferentially attack septating cells and often reach the cytoplasm within  
59 few minutes, suggesting that the final target for arresting bacterial growth or killing is not the cy-  
60 toplasmic membrane (*Sochacki et al., 2011*). However, fluorescence labeling may easily tweak the  
61 delicate balance of macromolecular interactions and thus affect experimental observations.

62 We have recently reported an analytical model for elastic X-ray and neutron scattering from live  
63 *Escherichia coli* without the need to resort to any specific labelling technique (*Semeraro et al., 2021*).  
64 In particular, we combined the different sensitivities of X-rays and neutrons to matter, including  
65 H/D contrast variation, with a compositional multi-scale model. This allowed us to detail the bacte-  
66 rial hierarchical structure on lengths scales bridging four orders of magnitude, i.e., spanning from  
67 bacterial size to the molecular packing of lipopolysaccharides (LPS) in the outer leaflet of the outer  
68 membrane. Here we use this model, taking advantage of the fact that the full breath of structural  
69 information is encoded in a single scattering pattern, and exploit millisecond time-resolved syn-  
70 chrotron (ultra) small-angle X-ray scattering (USAXS/SAXS) to study the response of *E. coli* to three  
71 lactoferricin-derived AMPs: LF11-215 (FWRIRIRR-NH<sub>2</sub>), LF11-324 (PFFWRIRIRR-NH<sub>2</sub>) and O-LF11-215  
72 (octanoyl-FWRIRIRR-NH<sub>2</sub>). The activity of these AMPs has been studied before, both *in vitro* and in  
73 bacterial membrane mimics, using an array of biophysical and biochemical assays (*Zweytick et al.,*  
74 *2011, 2014; Sánchez-Gómez et al., 2015; Marx et al., 2021b*).

75 Joining these elastic scattering experiments with cryo-TEM and assays for determining peptide  
76 partitioning as a function of peptide activity enabled us to gain unprecedented insight into the  
77 peptide-induced sequence of events. Strikingly, we found that the studied peptides are able to  
78 reach the bacterial cytosol just within few seconds, much faster than previously reported (*Choi*  
79 *et al., 2016*). Concomitantly this leads to a jump of peptide concentration in the cytosol, reach-  
80 ing about 100 mM at full growth inhibition. The most effective AMP presently studied, LF11-324,  
81 excels others by an increased speed of translocation and lowest cytosolic concentration. We also  
82 observed collateral damage of the bacterial cell envelope (loss of LPS packing, loss of positional  
83 correlations between outer and inner membranes, vesiculation/tubulation, cell shrinkage) in agree-  
84 ment with previous studies (*Zweytick et al., 2011*). However, these changes occurred at later time  
85 points and also for peptide concentrations far below the minimum inhibitory concentration (MIC).  
86 The primary cause for bactericidal or bacteriostatic activity of the presently studied peptides is  
87 thus not a damage of the structural integrity of the cell-wall, but appears to be a fast and efficient  
88 shut-down of bacterial metabolic activity.

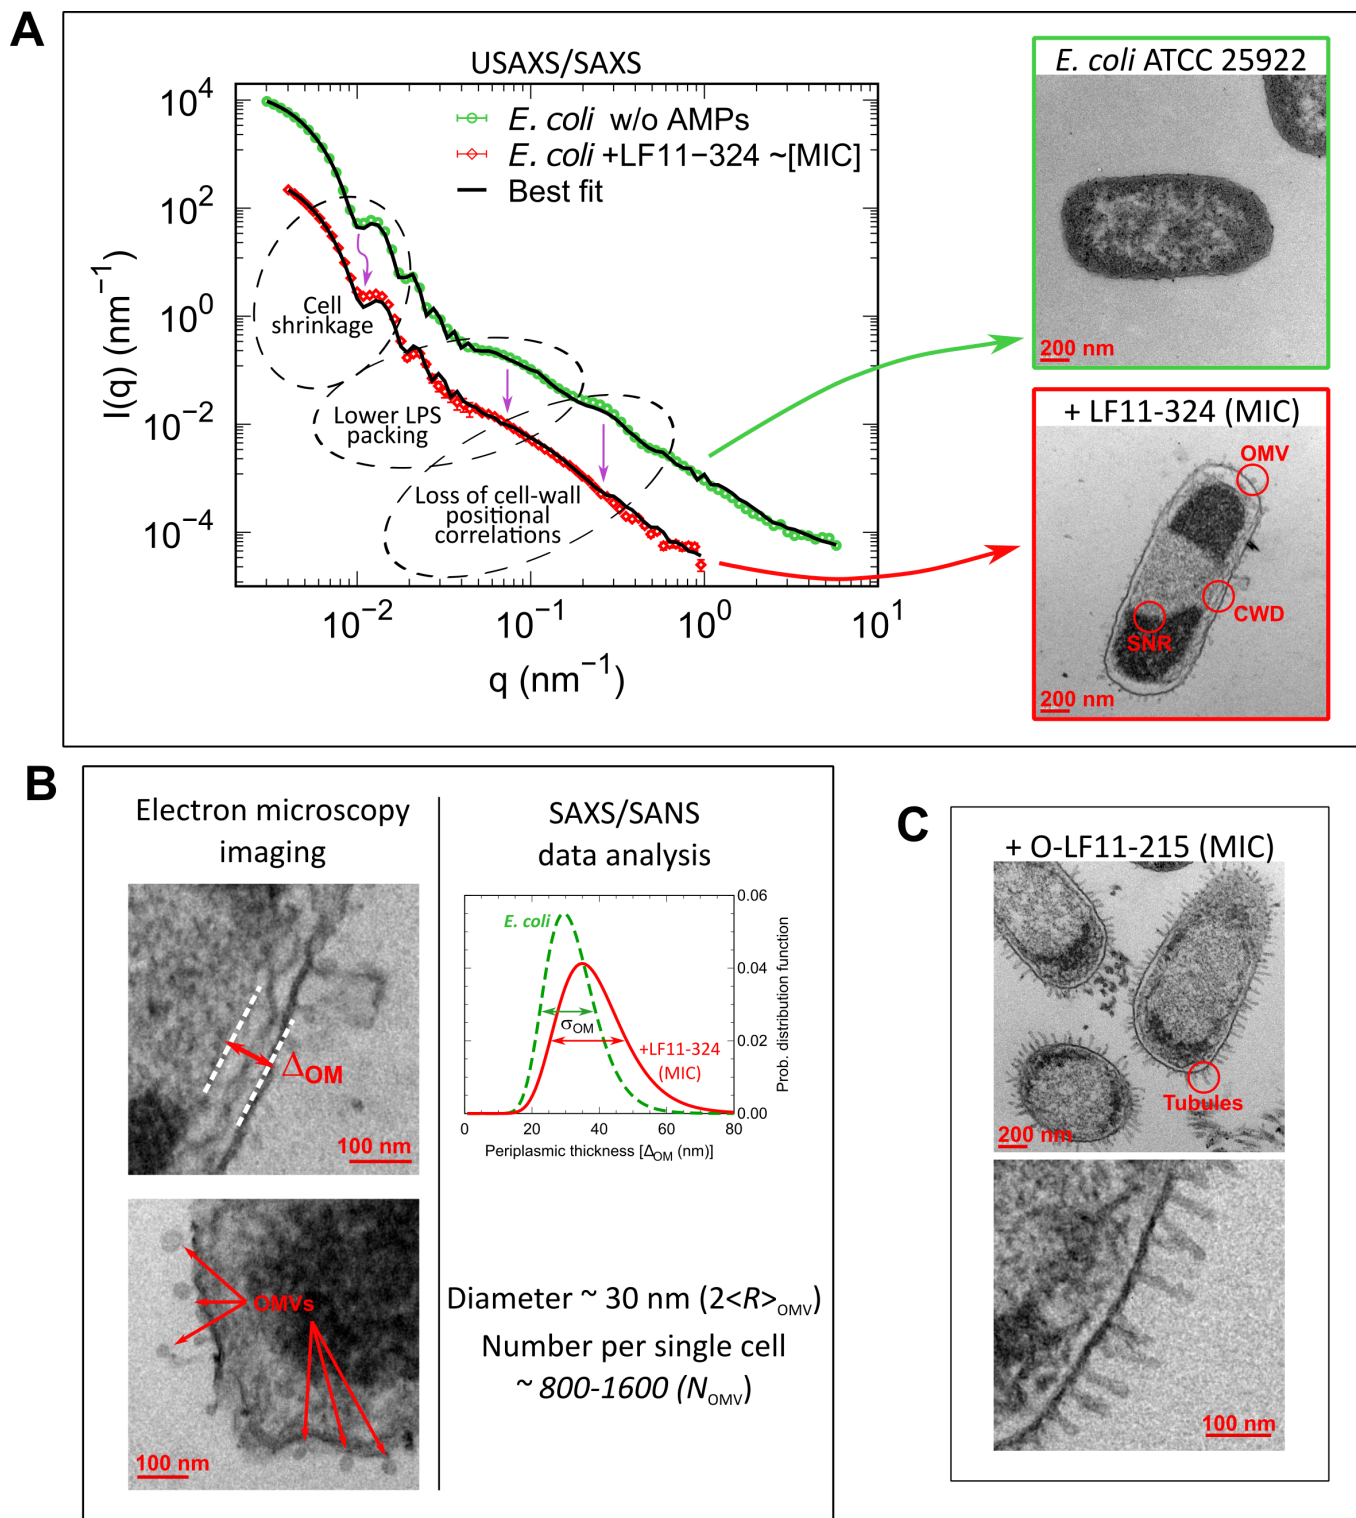

**Figure 1. (A)** Mapping the main structural changes in *E. coli* ATCC 25922 (green symbols) upon 1 h incubation with LF11-324 (red symbols) as observed by USAXS/SAXS and TEM. Scattering data of *E. coli* ATCC 25922 are from [Semeraro et al. \(2021\)](#). Black lines are the best fits using [Equation 6](#). Abbreviations: OMV: outer membrane vesicle formation; CWD: cell-wall damaging; SNR: phase separation of the nucleoid region. **(B)** TEM examples of membrane detachment and OMV formation due to LF11-324, and respective *ensemble* results from scattering data analysis for the distance distribution between inner and outer membranes. **(C)** Bacteria upon 1 h incubation with O-LF11-215, showing the formation of tube-like protrusions.

**Figure 1-Figure supplement 1.** Cell number-dependent MIC plots for different peptides.

**Figure 1-Figure supplement 2.** Comparison between USAXS/SAXS and contrast-variation SANS data and details of the scattering data analysis.

**Figure 1-Figure supplement 3.** TEM observations for LF11-215, LF11-324 and O-LF11-215 at the MICs and sub-MICs.

**Table 1.** Change of *E. coli* structure due to LF11-324 ( $[P] \sim \text{MIC}$ ) as observed from USAXS/SAXS/SANS data analysis.

| Parameters                                                       | Values                                          |
|------------------------------------------------------------------|-------------------------------------------------|
| $\Delta\rho_{\text{CP}} \times 10^{-4} \text{ (nm}^{-2}\text{)}$ | $-0.17 \pm 0.02^{(X)}$ ; $-0.14 \pm 0.05^{(N)}$ |
| $\Delta\rho_{\text{PP}} \times 10^{-4} \text{ (nm}^{-2}\text{)}$ | $0.18 \pm 0.06^{(X)}$ ; $0.12 \pm 0.04^{(N)}$   |
| $\Delta\Delta_{\text{OM}} \text{ (nm)}$                          | $6 \pm 3$                                       |
| $\Delta\sigma_{\text{OM}} \text{ (nm)}$                          | $3.4 \pm 1.7$                                   |
| $\Delta\rho_{\text{PG}} \times 10^{-4} \text{ (nm}^{-2}\text{)}$ | $-0.27 \pm 0.07^{(X)}$ ; $-0.59 \pm 0.14^{(N)}$ |
| $\Delta N_{\text{OS}} \times 10^6$                               | $-2.0 \pm 0.4^{(X)}$ ; $-1.6 \pm 0.8^{(N)}$     |
| $\Delta R \text{ (nm)}$                                          | $-27 \pm 7$                                     |

(X) from SAXS. (N) from SANS (SLDs were obtained by extrapolating to 0 wt% D<sub>2</sub>O).

## 89 Results

### 90 Defining structural reference states of AMP activity in *E. coli*

91 Unravelling the time-line of structural events occurring in *E. coli* due to lactoferricin activity by US-  
92 AXS/SAXS necessitates a detailed prior characterization of two reference states: (i) neat bacteria  
93 before AMP administration ('initial-state'), and (ii) AMP-affected/killed bacteria ('end-state'). Here,  
94 end-state refers to one hour of incubation of bacteria at a given AMP concentration. We have  
95 recently reported initial-state structures of different *E. coli* strains at different hierarchical length  
96 scales—including size of bacteria, distance between inner and outer membranes, and LPS packing  
97 density—in terms of a multi-scale analytical model using joint USAXS/SAXS and (very) small-angle  
98 neutron scattering (VSANS)/SANS experiments (*Semeraro et al., 2021*). The same concept was ap-  
99 plied here to reveal the end-state structure of *E. coli*. In order to remove ambiguities in adjustable  
100 parameters due to ensemble averaging, these experiments were coupled to cryo-TEM (**Figure 1**).  
101 It is important to note that SAXS/SANS experiments require high bacterial concentrations ( $\sim 10^9$   
102 CFU/ml). Since this affects AMP activity (*Marx et al., 2021b*), we report the MIC as a function of  
103 cell number density; the corresponding MIC values for the presently studied AMPs are reported in  
104 **Figure 1-Figure Supplement 1**.

105 Small-angle scattering (SAS) patterns of initial and end-states showed distinct differences, many  
106 of which can be compared to cryo-TEM results. Membrane ruffling, for example, originating mainly  
107 from increased fluctuations of cytoplasmic membranes, leads to a modification of the inner/outer  
108 membrane distance distribution function (**Figure 1A-B** and **Figure 1-Figure Supplement 2F**). Shrink-  
109 ing of bacterial size, in turn is observed by changes in intensity modulation at very low scattering  
110 vectors. In addition, hidden to TEM, but revealed by USAXS/SAXS/SANS are changes to the lat-  
111 eral LPS density when focusing on the scattering shoulder at  $q \sim 0.07 \text{ nm}^{-1}$ . The lowering of its  
112 intensity might originate either from a lower LPS surface density (LPS packing), or a loss of posi-  
113 tional correlations along the surface (membrane roughness or waving), or a combination both. The  
114 end-state scattering patterns of bacteria in the presence of the well distinct MICs of LF11-324 and  
115 LF11-215 were identical. The scattering patterns of O-LF11-215 instead indicated the formation  
116 of peptide aggregates (Appendix 1), which results from its increased hydrophobicity and hence  
117 lower critical aggregate concentration in buffer. LF11-324 and LF11-215 caused the formation of  
118 extracellular vesicles, also known as outer membrane vesicles (OMVs), clearly observed by TEM  
119 (**Figure 1A-B**) and with an average diameter of  $\sim 30 \text{ nm}$  diameter as revealed by SAS data analysis.  
120 O-LF11-215, in contrast, causes the formation of extramembranous tubes (**Figure 1C**), to which US-  
121 AXS/SAXS/SANS is not sensitive to. Further, the increased scattering contributions originating from  
122 O-LF11-215 aggregates impeded the detection of OMVs. Notably, SAS is insensitive to the inner  
123 cytosolic structure of bacteria (*Semeraro et al., 2021*). Hence the peptide induced separation of  
124 the nucleoid region from the nucleoid-free cytosol (**Figure 1A**) reported also previously from TEM  
125 (*Zweytick et al., 2011*), is not observed in our scattering data.



126 **Table 1** summarizes the changes between initial and end-states for LF11-324 from the joint US-  
127 AXS/SAXS and SANS multi-scale analysis. In particular, we report (i) contrast changes in terms of the  
128 scattering length densities (SLDs) of the cytoplasm,  $\rho_{CP}$ , periplasm,  $\rho_{PP}$ , and peptidoglycan,  $\rho_{PG}$ , (ii)  
129 microscopic to mesoscopic structural size changes of bacteria, approximated by an ellipsoid of in-  
130 ner radius  $R$ , and distance between inner and outer membranes,  $\Delta_{OM}$ , as well as the corresponding  
131 distribution of distances between the two membranes,  $\sigma_{OM}$ , and (iii) nanoscopic structural changes  
132 as observed for the average number of LPS,  $N_{OS}$ , per cell. See *Semeraro et al. (2021)*, for a justifi-  
133 cation of all used parameters. The decrease of  $\rho_{CP}$ , along with the increase of  $\rho_{PP}$ , signifies leakage  
134 of mainly low-weight molecules from the cytoplasm (**Figure 1-Figure Supplement 2B-C**). Notably,  
135 the observed cell shrinkage of  $\sim 5\%$  leads to a decrease of cell surface of approximately  $2 \times 10^6$   
136  $\text{nm}^2$ . Apparently this is at least in part compensated by OMV formation, as suggested by their total  
137 surface estimate of  $\sim (2 - 6) \times 10^6 \text{ nm}^2$  from SAS analysis (see Appendix 2).

### 138 **Kinetics: time-resolved USAXS/SAXS**

139 The structural transitions from initial to end-state were followed by USAXS/SAXS at millisecond  
140 time resolution. Stopped-flow mixing ensured thorough and rapid re-dispersion (mixing time of  
141 50 ms) of peptides and bacteria (**Figure 2-Figure Supplement 1**) and led to immediate changes  
142 of scattering patterns. Firstly, LPS packing  $p_{LPS} = N_{OS}/N_{OS}^0$  ( $N_{OS}^0$ ...initial number of LPS per cell)  
143 started to decrease at  $\Delta t \sim 10$  s after mixing, independent of LF11-324 concentration, i.e. even  
144 at  $[P] = 0.3 \times \text{MIC}$  (**Figure 2A**). The loss of cytoplasmic content, as observed in  $\rho_{CP}$ , commenced at  
145 similar times, although the increase of  $\rho_{PP}$  can be tracked down to 3 s for the highest LF11-324 con-  
146 centration (**Figure 2B**). Also the drop of  $R$  exhibited concentration-dependent kinetics (**Figure 2C**),  
147 starting at 20–50 s for  $[P] = 1.2 \times \text{MIC}$  and  $0.7 \times \text{MIC}$ , and  $>10$  min for  $[P] = 0.3 \times \text{MIC}$ . Changes of  $\Delta_{OM}$ ,  
148  $\sigma_{OM}$  and  $\rho_{PG}$  in turn seem to be largely decoupled from these early events, with an onset of 2–10  
149 minutes after peptide addition (**Figure 2D - F**). Interestingly, LF11-215 led to very similar kinet-  
150 ics for all parameters, except for slower changes of  $\rho_{CP}$  and  $\rho_{PP}$  (**Figure 2-Figure Supplement 2**,  
151 **Figure 2-Figure Supplement 3**). This suggests that the permeability of the cell-wall is affected  
152 in a concentration-dependent and peptide-specific manner. The similar onsets for changes of  
153  $\Delta_{OM}$ ,  $\sigma_{OM}$  and  $\rho_{PG}$  in turn suggest that this does not apply to the overall stability of the cell en-  
154 velope. Interestingly, no decrease of  $p_{LPS}$  was observed for LF11-215 at  $[P] = 1.6 \times \text{MIC}$  (**Figure 2-**  
155 **Figure Supplement 3A**). In turn, changes of  $\rho_{CP}$  and  $\rho_{PP}$  occurred for O-LF11-215 at about simi-  
156 lar times than for LF11-324 (**Figure 2B**). Later onsets of changes were observed for  $p_{LPS}$  ( $\sim 2$  min,  
157 **Figure 2G**) and  $R$  ( $\sim 10$  min, **Figure 2I**) in this case. The initial increase of  $p_{LPS}$  is likely to be an arte-  
158 fact, probably due to the overlap of  $I_{\text{cell}}(q)$  and  $I_{\text{clu}}(q)$  (see **Figure 2-Figure Supplement 1D**). The  
159 analysis of end-states was obscured for O-LF11-215 due to rapid sample sedimentation triggered  
160 by macroscopic peptide/bacteria clustering.

161 Scattering originating from LF11-215/LF11-324-induced OMV formation was discernible for  $\Delta t >$   
162  $1 - 2$  min. Yet, the average number of formed OMVs appear to be peptide- and concentration-  
163 independent within the first 10 min. Finally, the peptide cluster term, introduced for the analysis  
164 of O-LF11-215, enabled us to estimate that a large increase of peptide uptake starts after about 2  
165 min. No dependence on peptide concentration was observed (**Figure 3B**).

### 166 **Peptide partitioning and cooperativity**

167 Finally, we applied a previously detailed assay for AMP partitioning in *E. coli* based on growth inhi-  
168 bition (*Marx et al., 2021b*). A statistical analysis of the corresponding data in terms of cumulative  
169 distribution functions (see Appendix 4) allowed us to map the probability distributions of inhibiting  
170 bacterial growth as a function of cell concentration  $n_{\text{cell}}$ , including the minimum concentrations for  
171 inhibiting a given percentage  $x$  of *E. coli*,  $IC_x$  (**Figure 4**); note that  $\text{MIC} \equiv IC_{99.9}$ .

172 In agreement with our previous report for *E. coli* K12 (*Marx et al., 2021b*), the MIC of LF11-324  
173 is lower than that of LF11-215 at all cell concentrations. For O-LF11-215, MIC values matched those  
174 of LF11-324 at low cell concentrations, but increased strongly with  $n_{\text{cell}}$ , finally superseding that of

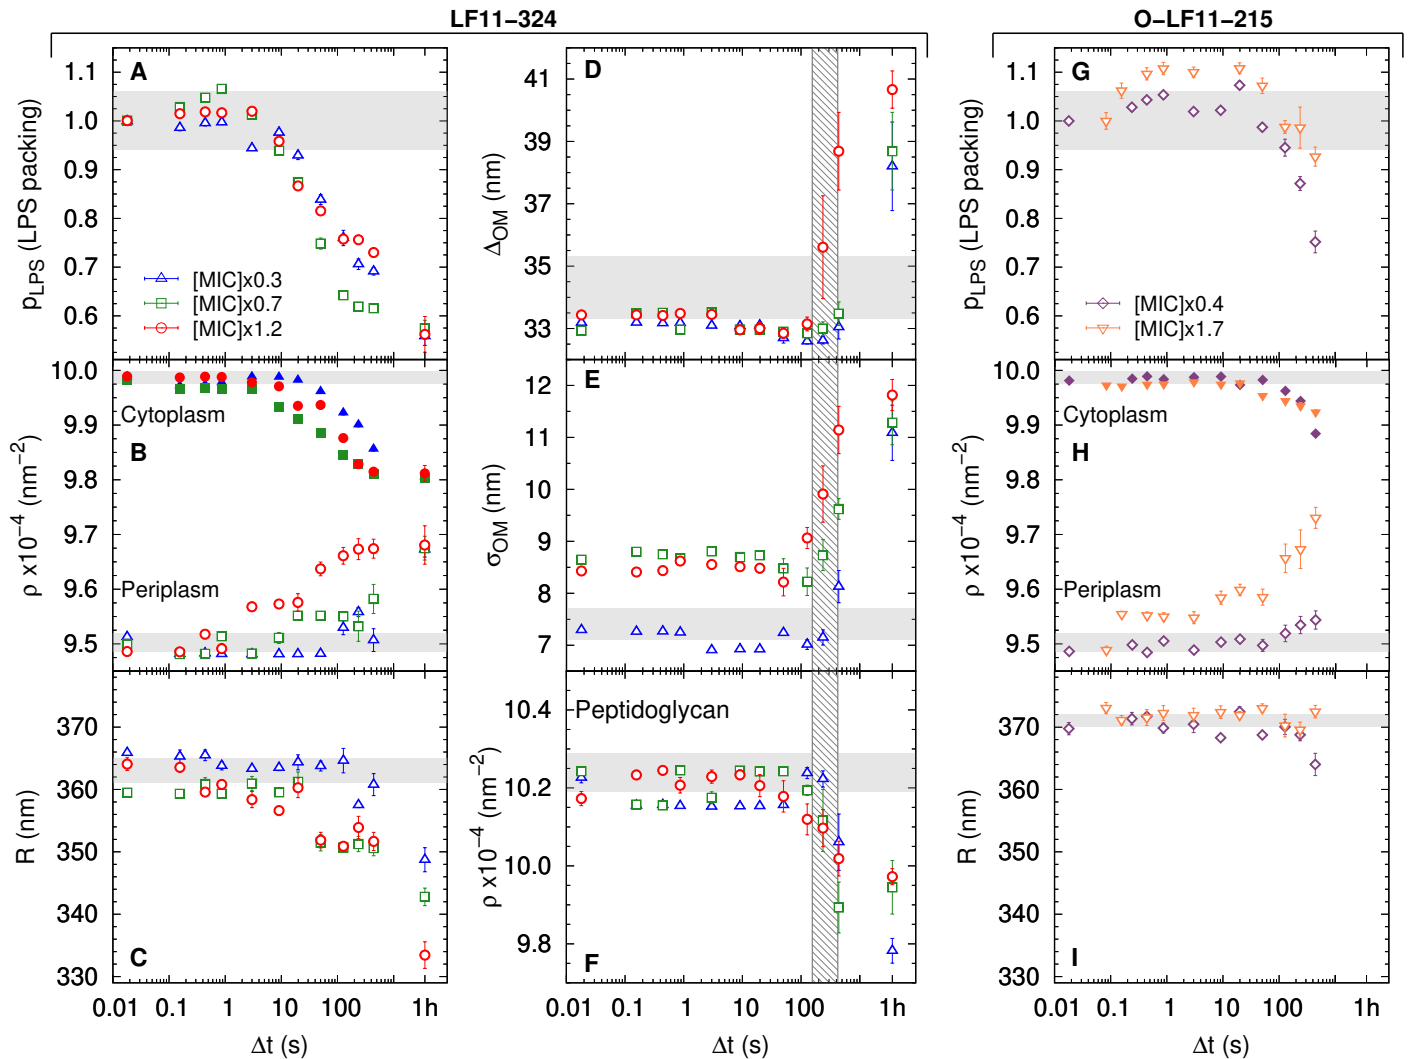

**Figure 2. (A-F)** Kinetics of the bacterial structural response to attack by LF11-324; results for three different peptide concentrations are shown. LPS packing (**A**); cytoplasm and periplasm SLDs (**B**); minor radius of the cell (**C**); intermembrane distance ( $\sim$  periplasm thickness) (**D**) and its deviation (**E**); and peptidoglycan SLD (**F**). (**G-I**) Bacterial response to O-LF11-215 at two concentrations. LPS packing (**G**); cytoplasm and periplasm SLDs (**H**); and minor ellipsoidal radius of the cell (**I**). Thick gray bands mark the degree of confidence from bacterial systems w/o peptides [see **Table 1** and *Semeraro et al. (2021)*], except for (**C**) and (**I**), where they refer to the average of the current cell radii at  $\Delta t = 0.0175$  s. Fluctuations of initial values can be due to biological diversity. The vertical gray grid in (**D-F**) indicates the time range of cell-wall damage. Note that this range does not depend on peptide concentration. Results at  $\Delta t = 1$  hour refer to end-states, when available.

**Figure 2-Figure supplement 1.** Schematic of the stopped-flow rapid mixing USAXS/SAXS experiments, including selected scattering patterns.

**Figure 2-Figure supplement 2.** Kinetics of the adjustable parameters for LF11-215 and O-LF11-215 systems.

**Figure 2-Figure supplement 3.** Kinetics of the adjustable parameters for LF11-215 systems.

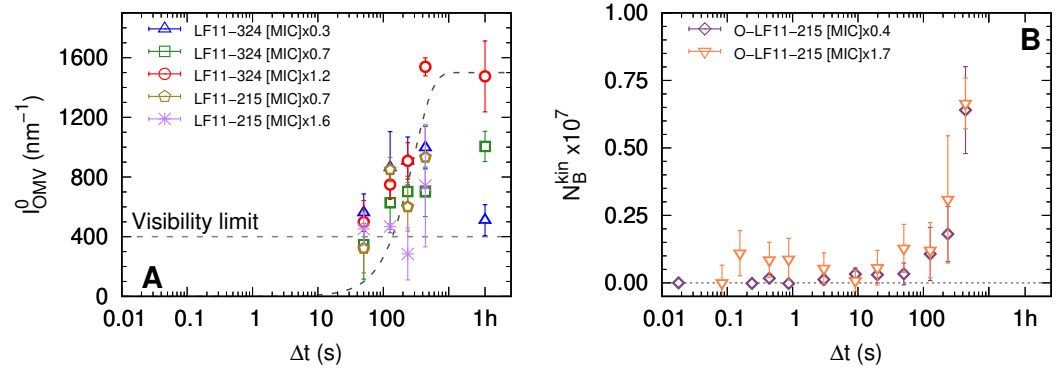

**Figure 3. (A)** Kinetics of the forward intensity of OMV scattering for different concentrations of LF11-324 and LF11-215. The dashed horizontal line represents the detection/'visibility' limit, below which  $I_{cell}(q) + I_{OMV}(q) \approx I_{cell}(q)$  in the entire  $q$ -range. The dashed exponential curve is a guide for the eyes. **(B)** Evolution of the number of partitioned peptides per cell for two O-LF11-215 concentrations, as calculated from the analysis of  $I_{clu}$ .

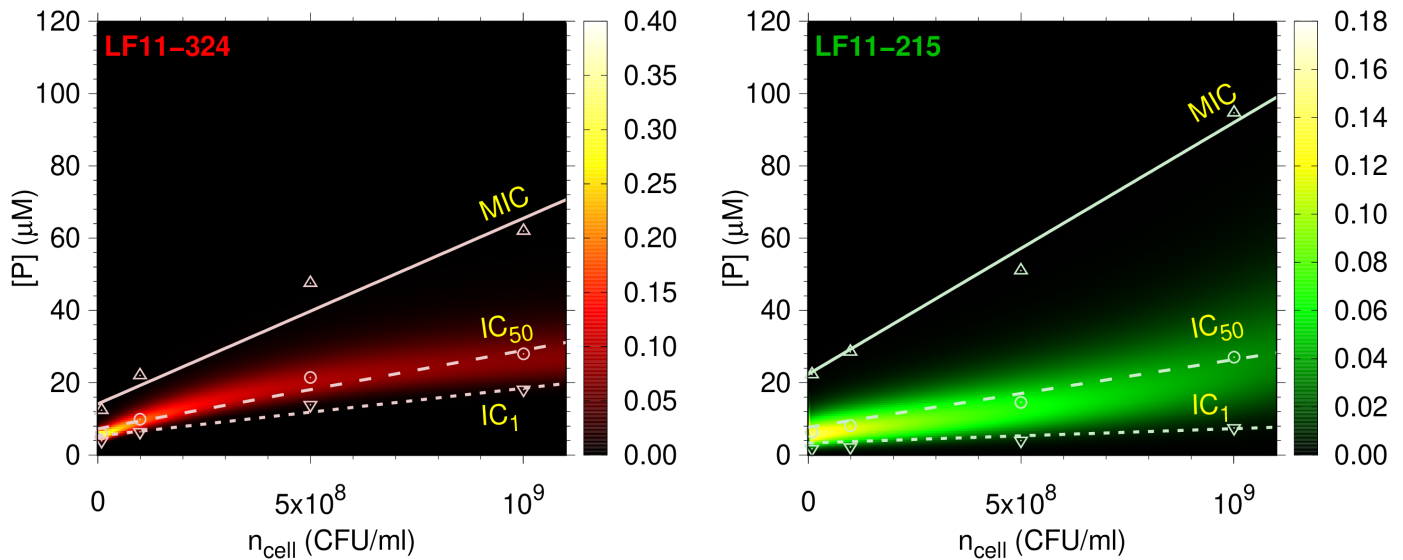

**Figure 4.** Amount of LF11-324 or LF11-215 required to attain growth inhibited fractions of either 0.999 (MIC, up triangles), 0.5 (circles) or 0.01 (down triangles) in *E. coli* ATCC 25922 as a function of  $n_{cell}$ . Lines are fits with [Equation 1](#). These data are overlaid with a surface plot of the associated killing probability density function. The color scales indicate the corresponding magnitudes.

**Figure 4-Figure supplement 1.**  $IC_x$  as a function of  $\phi_{IG}$  (inverse CDF).

175 LF11-215 and becoming immeasurably high due to peptide aggregation (**Figure 1–Figure Supplement 1**).  
176 **Figure 4** additionally illustrates the growth inhibition probabilities (see Appendix 4), whose peaks  
177 are close to  $IC_{50}$ . The distributions are much sharper for LF11-324 than for LF11-215, suggesting  
178 an increased cooperativity of killing for LF11-324. The broadness of the LF11-215 killing proba-  
179 bility distributions instead caused an earlier onset of growth inhibition at low  $n_{cell}$ . Further, the  
180 full width at half maximum of the probability distributions,  $\sigma_{[P]}$ , increased with cell concentration,  
181 e.g. from  $\sigma_{[P]} \approx 2.6 \mu M$  at  $n_{cell} = 10^7$  CFU/ml to  $\sigma_{[P]} \approx 13 \mu M$  at  $n_{cell} = 10^9$  CFU/ml for LF11-324. Sig-  
182 nificant noise levels in growth inhibition data for O-LF11-215 impeded a determination of killing  
183 probabilities at inhibitory concentrations  $< IC_{50}$ . However, data retrieved at higher inhibitory con-  
184 centrations suggest that the probability distributions roughly match those of LF11-324 at low cell  
185 concentrations, but definitely become broader than that of LF11-215 at high cell content (**Figure 4–**  
186 **Figure Supplement 1**). This is another signature of loss of killing efficacy at high  $n_{cell}$ , most likely  
187 due to peptide self-aggregation as discussed above.

188 Next, we derived for each  $IC_x$  (or inhibited fraction,  $\phi_{IG}$ ) the number of cell-partitioned pep-  
189 tides per cell,  $N_B$ , and the effective partitioning coefficient,  $K^{eff}$ , applying a previously reported  
190 thermodynamic formalism [(**Marx et al., 2021b**); see also **Equation 1**].  $N_B$  increased for all three  
191 peptides with  $\phi_{IG}$ , although the changes of  $N_B$  were smallest for LF11-324, followed by LF11-215  
192 and O-LF11-215 (**Figure 5A**). These results were confirmed independently also by Trp-fluorescence  
193 spectroscopy (see Appendix 3).

194 This behaviour was also mirrored in the  $\phi_{IG}$ -dependence of  $K^{eff}$ , which was nearly constant  
195 for LF11-324, increased only slightly for LF11-215 and showed the largest variation for O-LF11-215,  
196 reaching about 2.5 times higher levels than the other two peptides (**Figure 5B**). The approximate  
197 equal  $K^{eff}$  values of LF11-324 and LF11-215 for  $\phi_{IG} > 0.5$  demonstrate that both peptides partition  
198 about equally well into *E. coli*, not only at the MIC, but in a wide range of  $\phi_{IG}$  values.

199  $\zeta$ -potential measurements helped to further differentiate between the activity of the two pep-  
200 tides, by determining an upper estimate for the maximum number of peptides associated to the  
201 LPS leaflet,  $N_p^{max}$  (**Marx et al., 2021b**). After an initial increase of  $\zeta/\zeta_0$  at low peptide concentra-  
202 tions, plateau-values were rapidly reached for  $[P] \gtrsim 0.3 \times MIC$  at  $\zeta/\zeta_0 = 0.80 \pm 0.16$  for LF11-215 and  
203  $\zeta/\zeta_0 = 0.85 \pm 0.17$  for LF11-324, where  $\zeta_0$  refers to the reference system, i.e. neat bacteria (**Figure 5–**  
204 **Figure Supplement 1**). This converts to  $N_p^{max} = (8 \pm 2) \times 10^5$  and  $(6 \pm 2) \times 10^5$  for LF11-215 and  
205 LF11-324, respectively, and to the  $\phi_{IG}$ -dependence of  $N_p^{max}/N_B$  shown in **Figure 5C**. Strikingly, this  
206 demonstrates that  $\sim 98\%$  of the peptides are located within the inner compartments of *E. coli* at  
207 the MIC. The fraction of outer-leaflet-partitioned peptides increased toward lower  $\phi_{IG}$ , and some-  
208 what stronger for LF11-215, but does not exceed 10%. An analogous analysis for O-LF11-215 was  
209 impeded by the peptide aggregates, whose sizes were on the same order or even larger than that  
210 of bacteria (**Figure 5–Figure Supplement 2**).

## 211 Discussion

212 In agreement with previous studies (**Zweytick et al., 2011, 2014**) we found that end-states of *E.*  
213 *coli* after treatment with either peptide are comparable in terms of cell-wall damage, despite sig-  
214 nificantly different MICs. Even peptide concentrations far below the MIC led to similar structural  
215 effects, including, e.g., loss of positional correlations of the inner and outer membrane, or OMV for-  
216 mation. O-LF11-215, as opposed to LF11-215 and LF11-324, additionally lead to tubulation from  
217 the outer membrane (**Figure 1**).

218 Except for  $R$ ,  $\rho_{CP}$  and  $\rho_{PP}$  the kinetic pathways of structural events are equivalent for LF11-215  
219 and LF11-324. Also O-LF11-215 caused comparable variations of the above mentioned parameters  
220 on similar time scales. In this case a fully detailed analysis, however, is challenged by the propensity  
221 of O-LF11-215 to aggregate in buffer solution. We will thus focus primarily on LF11-215 and LF11-  
222 324.

223 **Figure 6** summarizes the major findings of the present study. The attack of AMPs first shows  
224 up in our time-resolved data by changes of the LPS packing density, as well as periplasmic and cy-



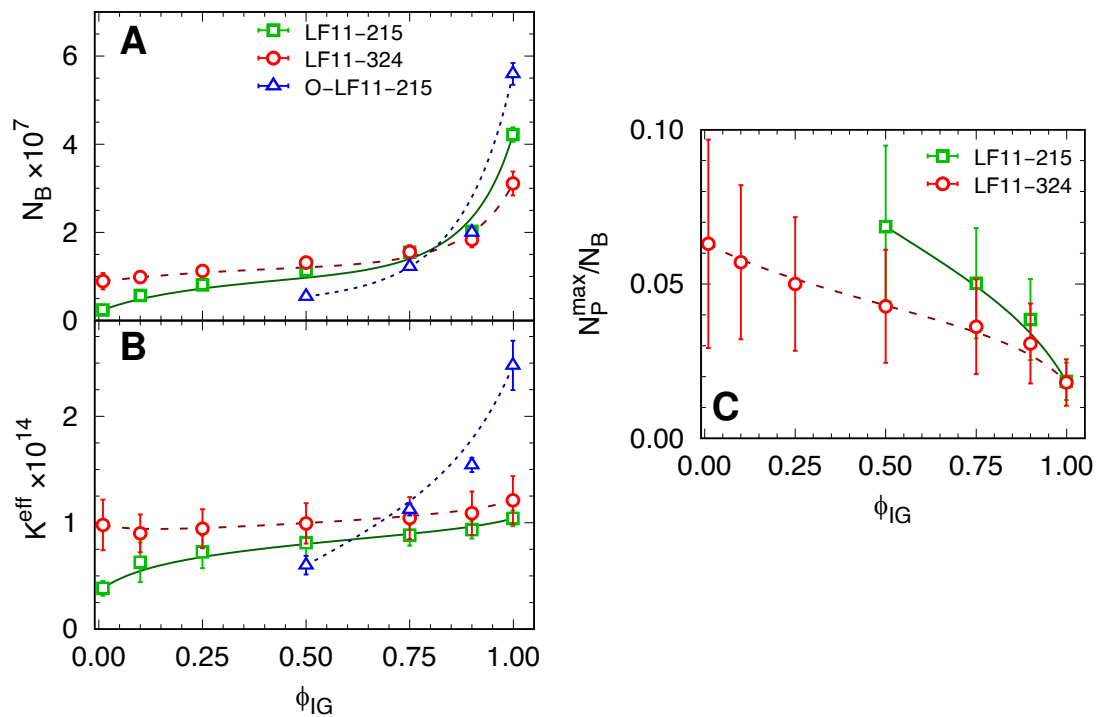

**Figure 5. (A-B)**  $N_B$  and  $K^{eff}$  values as a function of inhibited fraction. In the case of O-LF11-215,  $N_B \equiv N_B^{eff}$ . **(C)** Ratio between the maximum number of peptides on the outer leaflet and total number of partitioned peptides,  $N_p^{max}/N_B$ , as a function of inhibited fraction. Lines are guides for the eye.

**Figure 5-Figure supplement 1.**  $\zeta$ -potential and size measurements of LF11-215 and LF11-324.

**Figure 5-Figure supplement 2.**  $\zeta$ -potential and size measurements of O-LF11-215.

225 toplasmic SLDs. The decrease of  $\rho_{CP}$  is associated to a loss of small molecules (<1 kDa)—the major  
 226 contributors to its X-ray SLD (*Semeraro et al., 2021*)—from the cytoplasm. These molecules first dif-  
 227 fuse into the periplasm and then further into extracellular space. The combination of these effects  
 228 leads to a net increase of  $\rho_{PP}$ . Note that outward net leakage of cytosolic material follows from the  
 229 fact that final  $\rho_{PP}$  levels do not reach those of  $\rho_{CP}$ , despite the much larger cytosolic volume. Further,  
 230 the initial SLDs of buffer and periplasm are comparable, also explaining why our technique is not  
 231 directly detecting outer membrane leakage. Hence, either observed change of  $\rho_{PP}$  or  $\rho_{CP}$  is due to  
 232 a permeabilization of both cytoplasmic and outer membranes. For LF11-324, the permeabilization  
 233 of the cytoplasmic membrane occurred as fast as 3 – 10 s after mixing at  $[P] = 1.2 \times \text{MIC}$ . Dropping  
 234 peptide concentration led to a slowing down of this effect (10 – 20 s for  $[P] = 0.7 \times \text{MIC}$ , and 50 – 100 s  
 235 for  $[P] = 0.3 \times \text{MIC}$ , **Figure 2**). AMPs need to translocate all the way through the cell wall in order to  
 236 induce such effects. Considering that resealing of inner and outer membranes potentially cause  
 237 a delayed onset of leakage consequently implies that peptide translocation possibly proceeds on  
 238 time scales faster than  $\Delta\rho_{PP}$  or  $\Delta\rho_{CP}$ . The drop of  $R$  is a natural consequence of the loss of cellular  
 239 content, but occurs at somewhat later times. This is most likely due to the stored elastic energies  
 240 of the peptidoglycan layer, which will initially resist rapid deformations (*Yang et al., 2018*). Note,  
 241 however, that the peptidoglycan properties are likely affected by direct interactions with peptides  
 242 (*Zhu et al., 2019*). Remarkably, cytoplasmic membrane leakage occurs up to  $\sim 30$  times later for  
 243 LF11-215, independent of peptide concentration (**Figure 2-Figure Supplement 3**).

244 Pronounced differences between LF11-324 and LF11-215 were also observed from their effi-  
 245 cacies as a function of cell concentration (**Figure 4**). At equal  $n_{cell}$ , growth-inhibition probability  
 246 distributions are much narrower for LF11-324. Apparently, this increased ‘cooperativity’ correlates  
 247 with the peptide’s ability to permeabilize the cytoplasmic membrane faster. It is further illuminat-  
 248 ing to discuss the total amount of peptide penetrating into the cytosol. Both peptides saturate the

249 outer LPS leaflet already at concentrations lower than  $0.3 \times \text{MIC}$  (**Figure 5–Figure Supplement 1**),  
250 corresponding to an  $\sim 1:3$  AMP/LPS molar ratio as upper boundary estimate. Thus peptides pene-  
251 trate the outer membrane already when effects on bacterial growth are still very small. Assuming  
252 that LF11-324 and LF11-215 associate to first order at comparable amounts with other membrane  
253 leaflets leads to a lower boundary estimate of  $\sim 92\%$  of all peptides being located in the cytosol at  
254 the respective MICs. This corresponds to huge cytosolic concentrations of  $\sim 80$  mM for LF11-324,  
255 and  $\sim 110$  mM for LF11-215. The difference in cytosolic concentrations between the two peptides  
256 corresponds to about the difference in MICs (**Figure 1–Figure Supplement 1**). Our finding that  
257 only a minor fraction of the peptides are located within the cell wall even persists at sub-MIC con-  
258 centrations. This explains why the average damage of its structure is not peptide specific and does  
259 not depend on peptide concentration.

260 Wimley discussed already about

261 10 years ago the consequences of  
262 having  $10^7$  to  $10^9$  AMPs per cell  
263 (**Wimley, 2010**), suggesting a ‘reser-  
264 voir’ of non-membrane-bound pep-  
265 tides that would outnumber pro-  
266 teins, ATP and other metabolites.  
267 Cytosolic targets were also con-  
268 firmed by our TEM data [and those  
269 of others (**Hammer et al., 2010**;  
270 **Scheenstra et al., 2019**)] show-  
271 ing a collapsed nucleoid region  
272 (**Figure 1**). For instance this could  
273 be due to a competition mech-  
274 anism with polyamines, as puta-  
275 tive stabilizers of the functional ar-  
276 chitecture of the DNA ring (**Hou  
277 et al., 2001**). In support of the  
278 hypothesis of cytosolic targets, re-  
279 cent solid-state  $^{31}\text{P}$ -NMR measure-  
280 ments of *E. coli* in the presence of  
281 AMPs revealed increased dynam-  
282 ics of DNA and RNA phosphate  
283 groups correlated to TEM observa-  
284 tions of collapsed nucleoid volume  
285 (**Overall et al., 2019**). In addition,  
286 however, AMP interactions with  
287 other negatively charged metabo-  
288 lites and macromolecules in the cy-  
289 tosol, such as ribosomes and pro-  
290 teins, should be considered as po-  
291 tentially detrimental to the bacte-  
292 ria (**Zhu et al., 2019**). The about  
293 1.4 times lower cytosolic concen-  
294 tration of LF11-324 then is a signa-  
295 ture of a higher potency as compared to LF11-215 to interfere with one or more of the above  
296 listed candidates, hampering a number of metabolic functions (**Scocchi et al., 2015**), or inducing  
297 an apoptosis-like mechanism (**Dwyer et al., 2012**).

298 It follows from the considerations above that bacteria have an increased probability to recover  
299 from the peptides’ attack, if the cytosolic concentrations of LF11-324 and LF11-215 fall below those

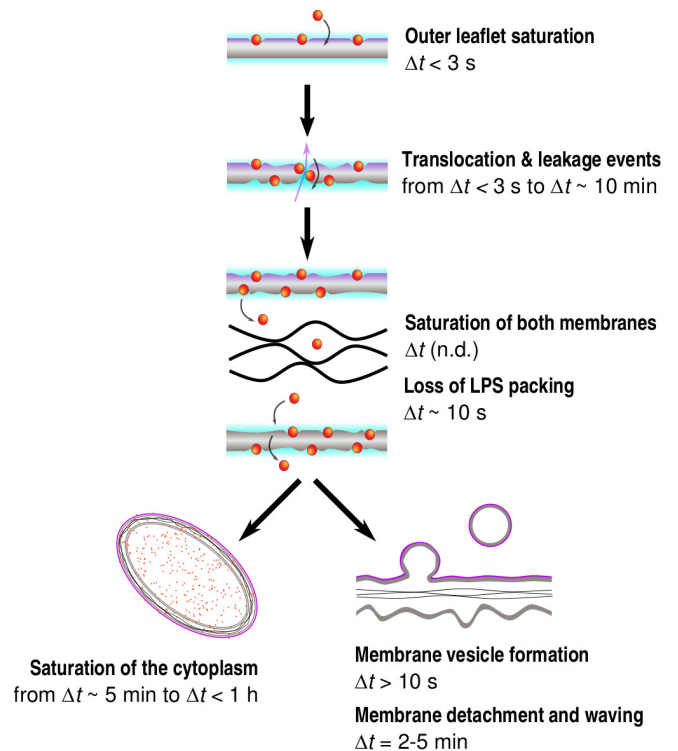

**Figure 6.** Simplified time sequence of LF11-215 and LF11-324 mode-of-action. The outer leaflet saturates with peptides within the first seconds after their attack. Then, depending of AMP type and concentration, a number of rare translocation events, coupled with leakage, takes places over a broad time range. When both membranes are saturated with peptides (exact time not determined), the cell-wall breaks down, leading to OMV formation ( $\Delta t > 10$  s), detachment of outer and inner membranes and waving ( $\Delta t > 2-5$  min). Simultaneously, AMPs saturate the internal compartments within several minutes, again depending of AMP type and concentration.

300 reported above (i.e.  $\lesssim 80$  and  $\lesssim 110$  mM, respectively). Thus, both the ability of LF11-324 to swiftly  
301 translocate through the cell envelope and its higher propensity to interfere with the metabolic ma-  
302 chinery contribute to its higher cooperativity in killing *E. coli* (Figure 4). Our experimental setup  
303 is not sensitive to directly observe either transient membrane pores or other membrane defects.  
304 Note, however, that previous studies in lipid-only mimics of bacterial membranes showed only  
305 weak membrane remodeling effects of lactoferricin derivatives as compared to other peptides  
306 (Zweytick *et al.*, 2011; Marx *et al.*, 2021b). This might be also a consequence of the rather short  
307 amino acid sequence of the lactoferricin derivatives, implying a too small length ( $\sim 1$  nm) to span  
308 the whole membrane thickness (3 – 4 nm). In turn, the highly flexible secondary structure and an  
309 amphipathic momentum being aligned along the peptide's backbone (Zorko *et al.*, 2009; Zweyt-  
310 ick *et al.*, 2011, 2014) should allow LF11-324 and LF11-215 to translocate membranes at higher  
311 rates than observed for linear peptides (Ulmschneider, 2017; Kabelka and Vácha, 2018). Note that  
312 peptide translocation can also lead to transient membrane leakage events (Ulmschneider, 2017),  
313 even with negligible AMP-induced lipid flip-flop (Marx *et al.*, 2021a). The higher hydrophobicity of  
314 O-LF11-215 should increase the likelihood of remaining membrane bound, which might build up  
315 differential membrane curvature stress and lead to the observed formation of membrane tubules.  
316 We also note that the different leakage kinetics for the LF11 peptides suggest a coupling to translo-  
317 cation kinetics, which in turn depends on membrane partitioning of the AMPs. Indeed, recently  
318 reported data for cytoplasmic membrane mimics of cardiolipin, phosphatidylethanolamine and  
319 phosphatidylglycerol show a somewhat faster membrane partitioning for LF11-324 than for LF11-  
320 215 (Marx *et al.*, 2021b).

321 Concluding, the superior time-resolution and sensitivity to structural changes from cellular size  
322 to molecular packing of synchrotron USAXS/SAXS allowed us to demonstrate, upon combination  
323 with advanced data modeling and complementary techniques, that AMPs are able to reach the  
324 cytosolic compartment of bacteria on the seconds time scale and thus much faster than previously  
325 considered (Sochacki *et al.*, 2011). Two factors emerge as key components for AMP efficacy: (i) a  
326 fast translocation through inner and outer membranes, rapidly reaching extremely high cytosolic  
327 AMP concentration levels ( $\sim 100$  mM), and (ii) an efficient shut-down of the bacterial metabolism,  
328 i.e., the lower the number of 'needed' AMPs in the cytosol the better. This latter process is driven by  
329 interactions of the AMPs with yet-to-be-determined cytosolic molecules, but most likely candidates  
330 are the polyanionic DNA, RNA, ribosomes and proteins (Zhu *et al.*, 2019), or charged metabolites.  
331 Collateral damage of the cell-wall structure is a 'by-product' of AMP activity. That is, it occurs already  
332 at sub-MIC concentrations (due to a rapid saturation of membranes with peptides) and thus is not  
333 the primary cause for growth inhibition. It is currently not clear whether the present findings can  
334 also be extended to other AMPs. Yet, similar conclusions were drawn for the peptide LL-37 by Zhu  
335 *et al.* (2019), and an emergent number of AMPs has been reported to show comparable partitioning  
336 behavior in bacteria (Loffredo *et al.*, 2021). We thus propose, that the combination of membrane  
337 translocation speed and efficient shut down of bacterial metabolism are generic factors that should  
338 be considered in designing future AMPs to combat infectious diseases. This also implies a widening  
339 of the pure focus on membrane-activity of AMPs currently applied in many studies.

## 340 **Methods and Materials**

### 341 **Samples**

342 *Escherichia coli* ATCC 25922 were provided by the American Type Culture Collection (Manassas, VA).  
343 Freeze-dried peptides powder of LF11-215 (H-FWRIRIRR-NH<sub>2</sub>), LF11-324 (H-PFFWRIRIRR-NH<sub>2</sub>) and  
344 O-LF11-215 (octanoyl-FWRIRIRR-NH<sub>2</sub>), purity >95%, were purchased from the Polypeptide Labora-  
345 tories (San Diego, CA). Lysogeny broth (LB)-agar and LB medium were obtained from Carl Roth,  
346 (Karlsruhe, Germany). All the other chemicals were purchased from Sigma-Aldrich (Vienna, Aus-  
347 tria).

### 348 Bacterial cultures

349 Bacterial colonies of *E. coli* ATCC 25922 were grown in LB-agar plates at 37 °C. Overnight cultures  
350 (ONCs) were prepared by inoculating a single colony in 3 ml LB-medium in sterile polypropylene  
351 conical tubes (15 ml), allowing for growth under aerobic conditions for 12–16 hours in a shaking  
352 incubator at 37 °C. Main cultures (MCs) were then prepared by diluting ONCs in 10 ml LB-medium  
353 in 50 ml sterile polypropylene conical tubes. Bacteria in the MCs grew under the same conditions  
354 applied to ONCs up to the middle of the exponential growth phase. Cells were then immediately  
355 washed twice and re-suspended in nutrient-free and isotonic phosphate-buffered saline (PBS) so-  
356 lution (phosphate buffer 20 mM, NaCl 130 mM) at pH 7.4.

### 357 AMP samples

358 LF11-324 and O-LF11-215 peptides displayed a weak solubility in PBS. AMP stocks (including LF11-  
359 215) were then prepared by adding acetic acid and DMSO, up to 0.3% and 3% vol/vol, respectively.  
360 Peptide stock solutions were diluted for measurements yielding a final concentration of 0.01%  
361 acetic acid and 0.1% vol/vol dimethyl sulfoxide (DMSO) (final pH 7.2). Hence, possible effects of  
362 DMSO on the cell envelope, as observed for model membrane structures (*Gironi et al., 2020*) can  
363 be neglected. Control USAXS/SAXS experiments adding a similar amount DMSO and acetic acid to  
364 *E. coli* also showed no discernible effect of the organic solvent (data not shown). Similarly, control  
365 experiments were performed to exclude effects on bacterial growth. Stock concentrations were  
366 determined by measuring the absorption band of the Trp residues with the spectrophotometer  
367 NanoDrop ND-1000 (Thermo Fisher Scientific, Waltham, MA). Peptide stock solutions were stored  
368 in silanized glass tubes until use.

### 369 Antimicrobial activity and partitioning modeling

370 The antimicrobial activity of the AMPs on *E. coli* was tested in the bacterial concentration range of 5x  
371 10<sup>5</sup> to 10<sup>9</sup> CFU/ml using a modified susceptibility microdilution assay (*Jorgensen and Ferraro, 2009*).  
372 Cell suspensions were incubated at a given AMP concentration for 2 h at 37 °C (control samples  
373 were incubated in buffer only). Cell growth was monitored upon addition of double concentrated  
374 LB-medium for about 20 h using a Bioscreen C MBR (Oy Growth Curves Ab, Helsinki, Finland).

### 375 Partitioning modeling

376 The analysis of the inhibited fraction of cells,  $\phi_{IG}$ , as a function of the total concentration of peptides,  
377  $[P]$ , enabled the extraction of  $IC_x$  values as a function of  $n_{cell}$ , as detailed in Appendix 4. Results were  
378 fitted with the linear partitioning function

$$[P](n_{cell}) = \underbrace{\frac{N_B[W]}{K^{eff}}}_{[P]_W} + \underbrace{\frac{N_B}{N_A} n_{cell}}_{[P]_B} = \frac{N_B}{N_A} \left( \frac{N_A[W]}{K^{eff}} + n_{cell} \right), \quad (1)$$

379 where  $[P]_W$  and  $[P]_B$  are the concentrations of AMPs dispersed in the aqueous phase and segre-  
380 gated into the cells, respectively;  $N_A$  is the Avogadro's constant;  $[W]$  is the concentration of water  
381 molecules in bulk (55.3 M at 37 °C);  $K^{eff}$  is the effective mole-fraction partitioning coefficient; and  
382  $N_B$  is the number of peptide monomers that are partitioned within a single cell [see *Marx et al.*  
383 (*2021b*) for details].

384 A similar approach was exploited in the case of O-LF11-215 peptide clusters in solution. In this  
385 case, the total peptide concentration is given by  $[P] = [P]_W + [P]_B + N[A]$ , where  $[A]$  is the molar  
386 concentration of aggregates, each of them consisting of an average number of peptides  $N$ . We  
387 also define the aggregate fraction  $f_A = N[A]/[P]$  and assume the equilibrium state  $N[P]_W \rightleftharpoons [A]$ .  
388 The definition of the molar partitioning coefficient  $K_x \propto K^{eff}$  (*Marx et al., 2021b*) refers to the  
389 balance of concentration of free peptides in bulk and partitioned peptide into the cells. Hence, its  
390 bare definition is unaffected by the presence of clusters. Finally, it is trivial to show that in this case



391 **Equation 1** becomes:

$$[P](n_{\text{cell}}) = \frac{N_B}{N_A(1-f_A)} \left( \frac{N_A[W]}{K^{\text{eff}}} + n_{\text{cell}} \right) = \frac{N_B^{\text{eff}}}{N_A} \left( \frac{N_A[W]}{K^{\text{eff}}} + n_{\text{cell}} \right), \quad (2)$$

392 where the fitting parameter  $N_B^{\text{eff}}$  is an upper boundary estimate for the actual number of parti-  
393 tioned peptides per cell  $N_B = N_B^{\text{eff}}(1-f_A)$ .

### 394 **$\zeta$ -potential, cell size, and outer leaflet distribution of peptides**

395  $\zeta$ -potential and dynamic light scattering (DLS) measurements were carried out with the Zeta-  
396 sizer Nano ZSP (Malvern Panalytical, Malvern, UK). *E. coli* suspensions were incubated with different  
397 concentrations of AMPs in buffer for 1 hour at 37 °C prior to each measurements. Control sam-  
398 ples (no AMPs) were suspended and incubated in buffer. A concentration of  $10^7$  CFU/ml provides  
399 the optimal compromise between high signal-to-noise ratio and low multiple-scattering bias. The  
400 AMP concentrations were centered on the MIC values previously determined with the susceptibil-  
401 ity microdilution assays, spanning from about 0.2× to 2.5×MIC. For  $\zeta$ -potential measurements the  
402 voltage for the electrodes was set to 4 V, such that currents did not exceed 1 mA, because of the  
403 high conductivity of the PBS buffer. Further, measurements were paused between repetitions for  
404 180 seconds. This prevented heat productions leading to sample denaturation and accumulation  
405 on the electrodes. The experiments were repeated three times and, due to the low sensitivity of  
406 such a set-up, each of them consisted of a minimum of six measurements [see also *Marx et al.*  
407 (2021b)]. For each system,  $\zeta$ -potential values and associated errors were given by the medians and  
408 the median absolute deviations, respectively, averaging over at least 18 repetitions. The same num-  
409 ber of scans was also used to obtain mean and standard deviation values for the hydrodynamic  
410 diameter,  $d_H$ , of the cells.

411 From the measured  $\zeta$ -potential values we estimated the maximum number of peptides that  
412 partition into the outer LPS leaflet,  $N_p^{\text{max}}$ , as reported recently (*Marx et al., 2021b*)

$$\frac{N_p^{\text{max}}}{N_{\text{LPS}}^0} \approx \left( \frac{z_{\text{LPS}}}{z_p} \right) \left( \frac{\zeta}{\zeta_0} \frac{S}{S_0} - 1 \right), \quad (3)$$

413 where  $z_{\text{LPS}} = -6$  (*Wiese et al., 1998*) and  $z_p = +5$  (*Zweytick et al., 2011*) are the nominal charges  
414 of LPS and LF11-215 or LF11-324 AMPs, respectively;  $\zeta$  and  $S$  are the  $\zeta$ -potential and total surface  
415 values of the system upon addition of peptides; and  $\zeta_0$  and  $S_0$  are the respective reference values  
416 (no AMPs).  $N_{\text{LPS}}^0 \approx 0.9S_0/A_{\text{LPS}}$  is the estimated number of LPS molecules, where  $A_{\text{LPS}} \approx 1.6 \text{ nm}^2$  (*Kim*  
417 *et al., 2016; Micciulla et al., 2019*) is the lateral area per LPS molecule. The prefactor originates  
418 from considering a maximum surface coverage of 90% by LPS molecules (*Seltmann and Holst,*  
419 *2002*).  $S_0$  was derived from DLS measurements, approximating the bacterial shape by a cylinder  
420  $d_H/2 \approx \sqrt{(\text{radius})^2/2 + (\text{length})^2/12}$ , considering that the hydrodynamic radius is approximately  
421 equivalent to the radius of gyration for micron-sized objects. Then fixing the radius at about 400  
422 nm (*Semeraro et al., 2021*) and retrieving the length from the above relation for  $d_H$  one obtains  
423  $S_0 \approx 5 \times 10^6 \text{ nm}^2$ .

### 424 **Fluorescence spectroscopy**

425 Fluorescence spectroscopy experiments were done with the Cary Eclipse Fluorescence Spectropho-  
426 tometer (Varian/Agilent Technologies, Palo Alto, CA). The excitation wavelength was set to  $\lambda = 280$   
427 nm (which corresponds to the maximum intensity of the absorption/excitation band of Trp), and  
428 emission spectra were acquired in the  $\lambda$ -range between 290 and 500 nm, with the Trp emission  
429 band peak being expected to lie around 330 to 350 nm. Samples were loaded in quartz cuvettes  
430 of 1 cm path-length. The background was subtracted from every Trp-spectrum prior to further  
431 analysis.

#### 432 Peptide solubility

433 Trp emission allowed determining whether LF11 peptides form aggregates or not in the MIC range.  
434 Spectra of LF11-only samples at  $[P] = 100 \mu\text{g/ml}$  were fitted with the log-normal-like function (**Burstein**  
435 **and Emelyanenko, 1996; Ladokhin et al., 2000**)

$$I(I_0, \lambda, \Gamma) = \begin{cases} I_0 \exp \left[ -\frac{\ln 2}{\ln^2 \alpha} \ln^2 \left( 1 + \frac{(\lambda - \lambda_{\max})}{y\Gamma} \right) \right], & \lambda > (\lambda_{\max} - y\Gamma) \\ 0, & \lambda \leq (\lambda_{\max} - y\Gamma) \end{cases} \quad (4)$$

436 where  $\lambda_{\max}$  and  $I_0$  are, respectively, wavelength and intensity of the emission peak;  $\Gamma$  is the full-  
437 width-at-half-maximum (FWHM) of the band;  $\alpha$  is a skewness parameter (fixed at an optimum value  
438 of 1.36 after testing; and  $y = \alpha/(\alpha^2 - 1)$ ).

439 Both LF11-215 and LF11-324 (see Appendix 1) showed a peak at about  $\lambda_{\max} \simeq 353 \text{ nm}$  and  $\Gamma \sim 63$   
440 nm. This is consistent with a location of the Trp residues in polar chemical environments having full  
441 mobility and thus suggests that these AMPs are monomeric (**Burstein and Emelyanenko, 1996**). In  
442 contrast, the acylated O-LF11-215 showed a significant blue-shift related to a location of Trp within  
443 apolar surroundings (**Ladokhin et al., 2000**), indicating the formation of peptide aggregates.

#### 444 Peptide partitioning

445 Analogously to the partitioning analysis performed for lipid only membranes (**Marx et al., 2021b**),  
446 the Trp emission of bacteria/AMPs mixtures were treated as a two-component signal, one coming  
447 from the peptides in the aqueous phase, and the second one from AMPs interacting with the cells.

448 Bacterial suspensions were incubated with different concentrations of AMPs in buffer for 1 hour  
449 at 37 °C (incubator Thermomixer C, Eppendorf, Germany). Reference samples (no AMPs) were sus-  
450 pended and also incubated in PBS. Experiments were performed at cell concentrations of  $5 \times 10^7$ ,  
451  $10^8$  and  $5 \times 10^8$  CFU/ml, and AMPs amounts equal to 0.5x, 1x and 2xMIC (each experiment was re-  
452 peated three times). Fluorescence intensities were background-subtracted using the bacteria-only  
453 reference spectra at the corresponding concentrations. This enabled us to subtract the average  
454 signal from the aromatic residues in the cells, and the scattering arising from the high concentra-  
455 tion of the cell suspensions. Spectra were analyzed with a linear combination of two independent  
456 bands (see **Equation 4**)  $I^W$  and  $I^B$ , referring to AMPs in bulk (W) and partitioned into the lipid bi-  
457 layer (B).  $\lambda^W$  and  $\Gamma^W$  were fixed to the reference values obtained by analyzing spectra from pure  
458 AMPs, and  $I_0^W$ ,  $I_0^B$ ,  $\lambda^B$  and  $\Gamma^B$  were freely adjusted. LF11-only solutions were measured to calibrate  
459 their intensity dependence in buffer. Then, the retrieved  $I_0^W$  values were converted to the concen-  
460 tration of dissociated peptides  $[P]_W$ . This allowed us to obtain the so-called peptide bound-fraction  
461 as  $f_B = 1 - [P]_W/[P]$ . The aggregation of O-LF11-215 led to low  $\lambda_{\max}^W$  values (see Appendix 1) and  
462 precluded the a similar analysis for these peptides.

#### 463 Transmission electron microscopy

464 *E. coli* suspensions at  $5 \times 10^8$  CFU/ml were mixed with peptides at the corresponding MICs and  
465 0.5xMICs in buffer A, and incubated for 1 hour at 37 °C (incubator Thermomixer C, Eppendorf,  
466 Germany). Control samples (no AMPs) were suspended and incubated in buffer A. Cell suspen-  
467 sions were centrifuged at 1300 g for 4 minutes in 1.5 ml Eppendorf tubes and resuspended (fixed)  
468 in 3% vol/vol glutaraldehyde and 0.1 M cacodylate buffer to bring the rapid cessation of biological  
469 activity and to preserve the structure of the cell. After fixation the samples were washed and post-  
470 fixed in 1% vol/vol  $\text{OsO}_4$  in 0.1 M cacodylate buffer. Dehydration was carried out in an ascending  
471 ethanol series followed by two steps with propylene oxide (**Hayat, 1989**) and embedded in Agar  
472 Low Viscosity Resin (Agar Scientific, Stansted, UK). Ultrathin sections (70–80 nm) were prepared on  
473 an Ultramicrotome UC6 (Leica Microsystems, Vienna, Austria) equipped with a 35° Ultra Diamond-  
474 knife (Diatome, Nidau, Switzerland). The grids were poststained with Uranylless (Science Services,  
475 Munich, Germany) and lead citrate according to Reynolds (**Hayat, 1989**). Transmission electron  
476 microscopy images were acquired with Tecnai T12 at 120kV (TFS, Warmond, Netherlands).

## 477 **Small angle scattering**

### 478 (Ultra-) Small-angle X-ray scattering

479 USAXS/SAXS measurements were performed on the TRUSAXS beamline (ID02) at the European Syn-  
480 chrotron Research Facility (ESRF), Grenoble, France. The instrument uses a monochromatic beam  
481 ( $\lambda = 0.0995$  nm) that is collimated in a pinhole configuration. Measurements were performed with  
482 sample-to-detector distances of 30.8 and 3.0 m, covering a  $q$ -range of  $0.001$ – $2.5$  nm $^{-1}$  (*Narayanan*  
483 *et al.*, 2018). Two-dimensional scattering patterns were acquired on a Rayonix MX170 detector, nor-  
484 malized to absolute scale and azimuthally averaged to obtain the corresponding one-dimensional  
485 USAXS/SAXS profiles. The normalized cumulative background from the buffer, sample cell and in-  
486 strument were subtracted to obtain the final  $I(q)$ . Bacterial samples (concentration  $\sim 10^9$  CFU/ml)  
487 were incubated with peptides for one hour at 37 °C and directly measured in a quartz capillaries  
488 of 2 mm diameter (37 °C), mounted on a flow-through set-up in order to maximize the precision  
489 of the background subtraction. Time-resolved experiments ( $n_{cell} \sim 10^9$  CFU/ml) were instead per-  
490 formed with a stopped-flow rapid mixing device (SFM-3/4 Biologic, Seyssinet-Pariset, France), with  
491 50 ms mixing of bacterial and peptides stock suspensions (37 °C), and enabling data acquisition  
492 after a kinetic time of about 2.5 ms (*Narayanan et al.*, 2014). A total of 50 frames was recorded for  
493 each experiment with an exposure time of 0.05 seconds and a logarithmic time-spacing ranging  
494 from 17.5 ms to about 10 minutes. Radiation damage tests were performed on reference systems  
495 prior to setting this X-ray exposure-times. The scattering intensities were further corrected for  
496 sedimentation and background scattering from the stopped-flow cell.

### 497 Contrast-variation small angle neutron scattering

498 SANS experiments were performed on the D11 instrument at the Institut Laue-Langevin (ILL), Greno-  
499 ble, France, with a multiwire  $^3\text{He}$  detector of  $256 \times 256$  pixels ( $3.75 \times 3.75$  mm $^2$ ). Four different set-  
500 ups (sample-to-detector distances of 2, 8, 20.5, and 39 m with corresponding collimations of 5.5,  
501 8, 20.5 and 40.5 m), at a wavelength  $\lambda = 0.56$  nm ( $\Delta\lambda/\lambda = 9\%$ ), covered a  $q$ -range of  $0.014$ – $3$  nm $^{-1}$ .  
502 Two distinct *E. coli* suspensions were incubated with peptides LF11-215 and LF11-324 in buffer for  
503 one hour at 37 °C. The bacterial concentration during the incubation was  $10^9$  CFU/ml, and both  
504 peptide concentrations were in the range of the measured MICs. Samples were then washed and  
505 resuspended in five different PBS solutions, containing 10, 30, 40, 50, or 90 wt% D $_2$ O. Samples  
506 (concentration  $\sim 10^{10}$  CFU/ml) were contained in quartz Hellma 120-QS banjo-shaped cuvettes of 2  
507 mm pathway and measured at 37 °C. Cuvettes were mounted on a rotating sample holder, which  
508 prevented the bacteria from sedimenting. Data were reduced with the Lamp program from ILL,  
509 performing flat field, solid angle, dead time and transmission correction. Further data were nor-  
510 malized by the incident neutron flux (via a monitor), and corrected by the contribution from an  
511 empty cell. Experimental set-up information and data are available at [https://doi.ill.fr/10.5291/ILL-](https://doi.ill.fr/10.5291/ILL-DATA.8-03-910)  
512 [DATA.8-03-910](https://doi.ill.fr/10.5291/ILL-DATA.8-03-910).

513 Note that the present experimental time ( $\sim 2$  h) is much shorter than the onset of cell lysis  
514 (*Zweytick et al.*, 2011). As control, SANS measurements were repeated at extended times after  
515 mixing with the AMP in order to test for sample stability (data not shown), in terms of shape, cell-  
516 wall structure and densities. The scattering intensities after 2, 4, 6 and 8 hours were comparable  
517 (with the exception of a weak decrease of  $\rho_{CP}$  between 2 and 4 hours). Further a comparison with  
518 TEM and SAXS data suggests that the peptide-induced cell-damage is stabilized within one hour,  
519 and does not develop any further for at least 8 hours.

### 520 Data analysis: peptide clusters

521 Reference O-LF11-215 samples were measured in the MIC range to investigate the microstructure  
522 of the peptide clusters. The SAXS pattern of O-LF11-215 was fitted with the equation

$$I_{clu}(q) = I_{AMP}^0 e^{-(qR_g)^2/3} (1 + I_P q^{-f}), \quad (5)$$

523 where the term in brackets is related to the structure of the aggregates, and the exponential Guinier  
 524 function accounts for the form factor of their subunits of radius of gyration  $R_g$  (**Zemb and Lindner,**  
 525 **2002**), and  $I_{AMP}^0$  is forward scattering intensity. The function  $I_p q^{-f}$  is the Porod law that describes  
 526 the high- $q$  asymptotic trend of scattering signal from the aggregates (**Glatter et al., 1982**), where  
 527  $I_p$  is a scaling factor that depends on the surface properties of the aggregates, and  $f$  is related to  
 528 their fractal dimension (**Sorensen, 2001**) (see Appendix 1).

#### 529 Data analysis: bacterial modeling

530 X-ray and neutron scattering data were jointly analyzed with a recently reported analytical scatter-  
 531 ing model (**Semeraro et al., 2021**). USAXS/SAXS patterns of end-states displayed an excess scatter-  
 532 ing contribution between  $q \sim 0.1\text{--}0.2 \text{ nm}^{-1}$  in the case of LF11-215 and LF11-324, not visible in  
 533 the corresponding SANS patterns. Note that SANS experiments were conducted on samples that  
 534 were washed and resuspended in different  $D_2O$ -containing buffer, while SAXS data were acquired  
 535 immediately after one hour incubation with peptides. Together with the observation of OMVs by  
 536 TEM (**Figure 1**), this suggests that the additional scattering contribution in SAXS data could be due  
 537 to freely diffusing OMVs in the suspension medium.

538 All scattering data were fitted with the analytical functions

$$I(q) = \begin{cases} I_{\text{cell}}(q) & \text{[Neutron data]} \\ I_{\text{cell}}(q) + n_{\text{cell}} I_{\text{OMV}}^0 [3j_1(qR_{\text{OMV}})]^2 & \text{[X-ray data]} \\ I_{\text{cell}}(q) + I_{\text{clu}}(q) & \text{[O-LF11-215 data]} \end{cases}, \quad (6)$$

539 where  $I_{\text{cell}}(q)$  is the scattering form factor for *E. coli*, as reported in **Semeraro et al. (2021)**, and  
 540  $3j_1(qR_{\text{OMV}})$  is the form factor of a sphere of radius  $R_{\text{OMV}}$ , with  $j_1$  being the normalized spherical  
 541 Bessel function of order 1. The prefactor  $I_{\text{OMV}}^0 = N_{\text{OMV}} V_{\text{OMV}}^2 \Delta\rho_{\text{OMV}}^2$  is the OMV forward scatter-  
 542 ing, where  $N_{\text{OMV}}$ ,  $V_{\text{OMV}}$  and  $\Delta\rho_{\text{OMV}}$  are, respectively, their number, volume and SLD difference to  
 543 the buffer. The choice of a simple spherical form factor was driven by its simplicity for checking  
 544 whether bacteria and OMVs have to be considered as non-interacting scatterers or not. Tests us-  
 545 ing an interaction cross-term approximating budding OMVs by spheres decorating a larger surface  
 546 (**Larson-Smith et al., 2010**), did not result in significant contributions, confirming the dominance of  
 547 freely diffusing OMVs. Note also that the  $I_{\text{OMV}}^0$  values were independent of the shape of the normal-  
 548 ized form factor, as they include our estimation of  $V_{\text{OMV}}$  and  $\Delta\rho_{\text{OMV}}$  (Appendix 2). Finally, in the case  
 549 of SANS data, instrumental smearing was taken into account. Data were fitted with a convolution  
 550 of  $I(q)$  and a Gaussian function with  $q$ -dependent width values, as provided by the reduction tools  
 551 at D11. In USAXS/SAXS data, the smearing effect was negligible.

552 After thorough testing, the analysis of SAS data (end-states and kinetics) was conducted using  
 553 only seven adjustable parameters describing  $I_{\text{cell}}(q)$ . These were the number of LPS molecules,  
 554  $N_{\text{OS}}$ ; the cytoplasm radius,  $R$ ; the scattering length densities (SLDs) of the cytoplasmic,  $\rho_{\text{CP}}$ , and  
 555 periplasmic space,  $\rho_{\text{PP}}$ ; the periplasmic average thickness,  $\Delta_{\text{OM}}$ , and its deviation,  $\sigma_{\text{OM}}$ ; and the SLD  
 556 of the peptidoglycan layer,  $\rho_{\text{PG}}$ . Additionally  $I_{\text{OMV}}^0$  and  $R_{\text{OMV}}$  were fitted for scattering intensities  
 557 in the presence of LF11-215 and LF11-324, while  $I_{\text{AMP}}^0$  was used and adjusted in the case of O-  
 558 LF11-215. Other parameters of  $I_{\text{clu}}(q)$  were fixed according to the O-LF11-215 alone systems (see  
 559 **Table 1**). This allowed us to fully describe the scattering-pattern variations upon peptide activity.  
 560 Other parameters, including those accounting for the structure of inner and outer membranes,  
 561 were fixed to the references values [see complete description in **Semeraro et al. (2021)**; all fixed  
 562 parameters are listed in **Table 2** and **Table 3**.

563 The scattering intensities of O-LF11-215-aggregates was comparable to that of bacteria in the  
 564 high  $q$ -range (**Figure 2–Figure Supplement 1D**). While this affected the quality of the ultrastruc-  
 565 tural parameters, it enabled at the same time the investigation of the kinetics of the AMP uptake.  
 566 Indeed, by assuming that O-LF11-215 is primarily forming aggregates in solution,  $I_{\text{AMP}}^0$  at  $\Delta t = 17.5$



**Table 2.** List of fixed parameters for the combined analysis of USAXS/SAXS and contrast variation SANS data of *E. coli*.

| Description                                                       | Fixed parameters                                   | Values                                   |
|-------------------------------------------------------------------|----------------------------------------------------|------------------------------------------|
| Center-to-center distance between the head-group layers in the CM | $D_{CM}$ (nm)                                      | 3.73                                     |
| Center-to-center distance between the head-group layers in the OM | $D_{OM}$ (nm)                                      | 3.33                                     |
| Width of the head-group layers for both CM and OM                 | $W_{ME}$ (nm)                                      | 0.75                                     |
| Center-to-center distance between the PG layer and the OM         | $\Delta_{PG}$ (nm)                                 | 16.7                                     |
| Width of the PG layer                                             | $W_{PG}$ (nm)                                      | 6.0                                      |
| Average SLD of the tail group layer in the CM                     | $\rho_{TI}$ (nm <sup>-2</sup> ) × 10 <sup>-4</sup> | 8.31 <sup>(X)}/0.022<sup>(N)</sup></sup> |
| Average SLD of the tail group layer in the OM                     | $\rho_{TO}$ (nm <sup>-2</sup> ) × 10 <sup>-4</sup> | 8.86 <sup>(X)}/0.012<sup>(N)</sup></sup> |
| Ratio between major and minor radii                               | $\epsilon$                                         | 2.0                                      |
| Effective radius of gyration of each OS core                      | $R_{g,OS}$ (nm)                                    | 0.45                                     |

<sup>(X)</sup> X-ray SLDs. <sup>(N)</sup> Neutron SLDs.

**Table 3.** List of fixed and D<sub>2</sub>O-dependent parameters for the combined analysis of USAXS/SAXS and contrast variation SANS data of *E. coli*. The average SLD of both CM and OM head-group layers,  $\rho_{ME}$ , the SLD of the buffer solution,  $\rho_{BF}$ , and the product of the each OS core volume and its contrast relative to the buffer,  $\beta_{OS} = V_{OS}\Delta\rho_{OS}$ .

| Fixed parameters                                   | Values | Neutrons (wt% D <sub>2</sub> O) |      |      |      |       |
|----------------------------------------------------|--------|---------------------------------|------|------|------|-------|
|                                                    |        | X-rays                          | 10   | 30   | 40   | 50    |
| $\rho_{ME}$ (nm <sup>-2</sup> ) × 10 <sup>-4</sup> | 12.9   | 1.56                            | 2.20 | 2.52 | 2.84 | 4.11  |
| $\rho_{BF}$ (nm <sup>-2</sup> ) × 10 <sup>-4</sup> | 9.476  | 0.135                           | 1.54 | 2.20 | 2.81 | 5.54  |
| $\beta_{OS}$ (nm) × 10 <sup>-4</sup>               | 10.7   | 3.83                            | 2.32 | 1.68 | 0.69 | -2.44 |

ms can be converted to the total known peptide concentration  $[P]$ . Hence, the further assumption that peptides leaving the clusters are directly partitioning into the cell allows to convert the difference  $[I_{AMP}^0(\Delta t) - I_{AMP}^0(0)]$  to  $[P]_B(\Delta t)$ . It follows that

$$N_B^{kin}(\Delta t) = \frac{N_A[P]_B(\Delta t)}{n_{cell}}, \quad (7)$$

where  $N_B^{kin}$  is the number of O-LF11-215 partitioned within the volume of a single cell that can be obtained time-resolved USAXS/SAXS data.

Finally, time-resolved USAXS/SAXS data were fitted using the parameters of the initial [see *Semeraro et al. (2021)*] and end-states as boundaries and guide to refine the  $\chi^2$  minimization. This was accomplished by means of a genetic selection algorithm exploiting >300 repetitions of converging fittings [see details in *Semeraro et al. (2021)*]. Mean values and errors of the adjustable parameters from both USAXS/SAXS and SANS data are the mean and standard deviation values of the >300 converging series. Variations in  $\Delta_{OM}$  and  $\sigma_{OM}$  at  $\Delta t = 17.5$  ms are due to lower signal-to-noise ratio available in time-resolved measurements. Compared to the reference system, stopped-flow measurements were performed with a lower exposure time and *E. coli* concentration [see *Semeraro et al. (2021)*].

## Acknowledgments

This project was supported by the Austrian Science Funds (FWF), grant no. P 30921. ESRF – The European Synchrotron and the Institut Laue–Langevin (ILL) are acknowledged for provision of SAXS (proposals LS-2513 and LS-2869) and SANS (exp. 8-03-910) beamtimes. The authors are grateful to T. Narayanan for his invaluable support, and thank J. M. Devos, D. Marquardt and M. Pachler, for their support during the proof-of-concept experiments (LS-2513), and the biological support laboratory at EMBL Grenoble for providing access to the laboratory equipment for bacterial sample preparation. The authors also acknowledge N. Malanovic for sharing her expertise about bacterial

589 cultures, and to S. Keller for the fruitful discussions. Finally, the authors thank the whole staff of  
590 ID02 and the D11 for support and availability.

### 591 **Competing interests**

592 The authors declare that no competing interests exist.

### 593 **References**

- 594 **Beveridge TJ.** Structures of Gram-Negative Cell Walls and Their Derived Membrane Vesicles. *Journal of Bacte-*  
595 *riology.* 1999; 181(16):4725–4733. doi: [10.1128/JB.181.16.4725-4733.1999](https://doi.org/10.1128/JB.181.16.4725-4733.1999).
- 596 **Burstein EA, Emelyanenko VI.** Log-Normal Description of Fluorescence Spectra of Organic Fluorophores. *Pho-*  
597 *tochemistry and Photobiology.* 1996; 64(2):316–320. doi: [10.1111/j.1751-1097.1996.tb02464.x](https://doi.org/10.1111/j.1751-1097.1996.tb02464.x).
- 598 **Choi H, Rangarajan N, Weisshaar JC.** Lights, Camera, Action! Antimicrobial Peptide Mechanisms Imaged in  
599 Space and Time. *Trends Microbiol.* 2016; 24(2):111–122. doi: [10.1016/j.tim.2015.11.004](https://doi.org/10.1016/j.tim.2015.11.004).
- 600 **Cioni P, Strambini GB.** Tryptophan phosphorescence and pressure effects on protein structure. *Biochimica et*  
601 *Biophysica Acta - Protein Structure and Molecular Enzymology.* 2002; 1595(1-2):116–130. doi: [10.1016/S0167-](https://doi.org/10.1016/S0167-4838(01)00339-9)  
602 [4838\(01\)00339-9](https://doi.org/10.1016/S0167-4838(01)00339-9).
- 603 **De Siervo AJ.** Alterations in the Phospholipid Composition of *Escherichia coli* B During Growth at Different  
604 Temperatures. *Journal of Bacteriology.* 1969; 100(3):1342–1349.
- 605 **Dwyer DJ, Camacho DM, Kohanski MA, Callura JM, Collins JJ.** Antibiotic-Induced Bacterial Cell Death Ex-  
606 hibits Physiological and Biochemical Hallmarks of Apoptosis. *Molecular Cell.* 2012; 46(5):561–572. doi:  
607 [10.1016/j.molcel.2012.04.027](https://doi.org/10.1016/j.molcel.2012.04.027).
- 608 **Fantner GE, Barbero RJ, Gray DS, Belcher AM.** Kinetics of antimicrobial peptide activity measured on individual  
609 bacterial cells using high-speed atomic force microscopy. *Nature Nanotechnology.* 2010; 5(4):280–285. doi:  
610 [10.1038/nnano.2010.29](https://doi.org/10.1038/nnano.2010.29).
- 611 **Gironi B, Kahveci Z, McGill B, Lechner BD, Pagliara S, Metz J, Morresi A, Palombo F, Sassi P, Petrov PG.** Effect of  
612 DMSO on the Mechanical and Structural Properties of Model and Biological Membranes. *Biophysical Journal.*  
613 2020; 119(2):274–286. doi: [10.1016/j.bpj.2020.05.037](https://doi.org/10.1016/j.bpj.2020.05.037).
- 614 **Glatter O, Kratky O, Kratky HC.** *Small Angle X-ray Scattering.* Academic Press; 1982.
- 615 **Hammer MU, Brauser A, Olak C, Brezesinski G, Goldmann T, Gutschmann T, Andrä J.** Lipopolysaccharide interac-  
616 tion is decisive for the activity of the antimicrobial peptide NK-2 against *Escherichia coli* and *Proteus mirabilis*.  
617 *Biochemical Journal.* 2010; 427(3):477–488. doi: [10.1042/BJ20091607](https://doi.org/10.1042/BJ20091607).
- 618 **Hayat MA.** *Principles and Techniques of Electron Microscopy - Biological Applications.* 3rd ed. Cambridge:  
619 Cambridge University Press; 1989.
- 620 **Heinrichs DE, Yethon JA, Whitfield C.** Molecular basis for structural diversity in the core regions of the  
621 lipopolysaccharides of *Escherichia coli* and *Salmonella enterica*. *Molecular Microbiology.* 1998; 30(2):221–232.  
622 doi: [10.1046/j.1365-2958.1998.01063.x](https://doi.org/10.1046/j.1365-2958.1998.01063.x).
- 623 **Hou MH, Lin SB, Yuann JMP, Lin WC, Wang AHJ, Kan LS.** Effects of polyamines on the thermal stability and  
624 formation kinetics of DNA duplexes with abnormal structure. *Nucleic Acids Research.* 2001; 29(24):5121–  
625 5128. doi: [10.1093/nar/29.24.5121](https://doi.org/10.1093/nar/29.24.5121).
- 626 **Jorgensen JH, Ferraro MJ.** Antimicrobial susceptibility testing: a review of general principles and contemporary  
627 practices. *Clinical Infectious Diseases.* 2009; 49(11):1749–1755. doi: [10.1086/647952](https://doi.org/10.1086/647952).
- 628 **Kabelka I, Vácha R.** Optimal Hydrophobicity and Reorientation of Amphiphilic Peptides Translocating through  
629 Membrane. *Biophysical Journal.* 2018; 115(6):1045–1054. doi: <https://doi.org/10.1016/j.bpj.2018.08.012>.
- 630 **Kim S, Patel DS, Park S, Slusky J, Klauda JB, Widmalm G, Im W.** Bilayer Properties of Lipid A from Various Gram-  
631 Negative Bacteria. *Biophysical Journal.* 2016; 111(8):1750–1760. doi: [10.1016/j.bpj.2016.09.001](https://doi.org/10.1016/j.bpj.2016.09.001).
- 632 **Kučerka N, Holland B, Pan J, Heberle FA, Gray CG, Tomberli B, Katsaras J.** The Detailed Scattering Density Profile  
633 Model of P<sub>g</sub> Bilayers as Determined by Molecular Dynamics Simulations, and Small-Angle Neutron and X-ray  
634 Scattering Experiments. *Biophysical Journal.* 2012; 102(3):504a–505a. doi: [10.1016/j.bpj.2011.11.2764](https://doi.org/10.1016/j.bpj.2011.11.2764).

- 635 **Kučerka N**, van Oosten B, Pan J, Heberle FA, Harroun TA, Katsaras J. Molecular Structures of Fluid  
636 Phosphatidylethanolamine Bilayers Obtained from Simulation-to-Experiment Comparisons and Experi-  
637 mental Scattering Density Profiles. *The Journal of Physical Chemistry B*. 2015; 119(5):1947–1956. doi:  
638 10.1021/jp511159q.
- 639 **Ladokhin AS**, Jayasinghe S, White SH. How to measure and analyze tryptophan fluorescence in membranes  
640 properly, and why bother? *Analytical Biochemistry*. 2000; 285(2):235–245. doi: 10.1006/abio.2000.4773.
- 641 **Larson-Smith K**, Jackson A, Pozzo DC. Small angle scattering model for Pickering emulsions and raspberry  
642 particles. *Journal of Colloid and Interface Science*. 2010; 343(1):36–41. doi: 10.1016/j.jcis.2009.11.033.
- 643 **Leber R**, Pachler M, Kabelka I, Svoboda I, Enkoller D, Vácha R, Lohner K, Pabst G. Synergism of Antimicrobial  
644 Frog Peptides Couples to Membrane Intrinsic Curvature Strain. *Biophysical Journal*. 2018; 114(8):1945–1954.  
645 doi: 10.1016/j.bpj.2018.03.006.
- 646 **Loffredo MR**, Savini F, Bobone S, Casciaro B, Franzyk H, Mangoni ML, Stella L. Inoculum effect of antimicrobial  
647 peptides. *PNAS*. 2021; 118(21):e2014364118. doi: 10.1073/pnas.2014364118.
- 648 Lohner K, editor. *Development of Novel Antimicrobial Agents: Emerging Strategies*. 1st ed. Norfolk, UK: Horizon  
649 Scientific Press; 2001.
- 650 **Lohner K**. Membrane-active Antimicrobial Peptides as Template Structures for Novel Antibiotic Agents. *Current*  
651 *Topics in Medicinal Chemistry*. 2017; 17(5):508–519. doi: 10.2174/1568026616666160713122404.
- 652 **Lohner K**, Sevcsik E, Pabst G. *Liposome-Based Biomembrane Mimetic Systems: Implications for Lipid–Peptide*  
653 *Interactions*; 2008.
- 654 **Malanovic N**, Marx L, Blondelle SE, Pabst G, Semeraro EF. Experimental concepts for linking the biological  
655 activities of antimicrobial peptides to their molecular modes of action. *Biochimica et Biophysica Acta (BBA) -*  
656 *Biomembranes*. 2020; 1862(8):183275. doi: 10.1016/j.bbamem.2020.183275.
- 657 **Marx L**, Frewein MPK, Semeraro EF, Rechberger GN, Lohner K, Porcar L, Pabst G. Antimicrobial peptide activity  
658 in asymmetric bacterial membrane mimics. *Faraday Discussions*. 2021; doi: 10.1039/D1FD00039J.
- 659 **Marx L**, Semeraro EF, Mandl J, Kremser J, Frewein MP, Malanovic N, Lohner K, Pabst G. Bridging the Antimi-  
660 crobial Activity of Two Lactoferricin Derivatives in *E. coli* and Lipid-Only Membranes. *Frontiers in Medical*  
661 *Technology*. 2021; 3:625975. doi: 10.3389/fmedt.2021.625975.
- 662 **Micciulla S**, Gerelli Y, Schneck E. Structure and Conformation of Wild-Type Bacterial Lipopolysaccharide Layers  
663 at Air-Water Interfaces. *Biophysical Journal*. 2019; 116(7):1259–1269. doi: 10.1016/j.bpj.2019.02.020.
- 664 **Müller-Loennies S**, Lindner B, Brade H. Structural Analysis of Oligosaccharides from Lipopolysaccharide (LPS)  
665 of *Escherichia coli* K12 Strain W3100 Reveals a Link between Inner and Outer Core LPS Biosynthesis. *Journal*  
666 *of Biological Chemistry*. 2003; 278(36):34090–34101. doi: 10.1074/jbc.M303985200.
- 667 **Narayanan T**, Gummel J, Gradzielski M. Probing the self-assembly of unilamellar vesicles using time-resolved  
668 SAXS. In: *Advances in planar lipid bilayers and liposomes*, vol. 20 Elsevier; 2014.p. 171–196. doi:  
669 10.1016/B978-0-12-418698-9.00007-1.
- 670 **Narayanan T**, Sztucki M, Van Vaerenbergh P, Léonardon J, Gorini J, Claustre L, Sever F, Morse J, Boesecke P.  
671 A multipurpose instrument for time-resolved ultra-small-angle and coherent X-ray scattering. *Journal of*  
672 *Applied Crystallography*. 2018; 51(6):1–14. doi: 10.1107/S1600576718012748.
- 673 **Overall SA**, Zhu S, Hanssen E, Separovic F, Sani MA. In Situ Monitoring of Bacteria under Antimicrobial  
674 Stress Using 31P Solid-State NMR. *International Journal of Molecular Sciences*. 2019; 20(1):181. doi:  
675 10.3390/ijms20010181.
- 676 **Sánchez-Gómez S**, Ferrer-Espada R, Stewart PS, Pitts B, Lohner K, Martínez De Tejada G. Antimicrobial activ-  
677 ity of synthetic cationic peptides and lipopeptides derived from human lactoferricin against *Pseudomonas*  
678 *aeruginosa* planktonic cultures and biofilms. *BMC Microbiology*. 2015; 15(1):137. doi: 10.1186/s12866-015-  
679 0473-x.
- 680 **Scheenstra MR**, van den Belt M, Tjeerdsma-van Bokhoven JLM, Schneider VAF, Ordonez SR, van Dijk A, Veld-  
681 huizen EJA, Haagsman HP. Cathelicidins PMAP-36, LL-37 and CATH-2 are similar peptides with different  
682 modes of action. *Scientific Reports*. 2019; 9(1):1–12. doi: 10.1038/s41598-019-41246-6.

- 683 **Scocchi M**, Mardirossian M, Runti G, Benincasa M. Non-Membrane Permeabilizing Modes of Action of  
684 Antimicrobial Peptides on Bacteria. *Current Topics in Medicinal Chemistry*. 2015; 16(1):76–88. doi:  
685 10.2174/1568026615666150703121009.
- 686 **Seltmann G**, Holst O. *The Bacterial Cell Wall*. 1st ed. Berlin Heidelberg: Springer-Verlag; 2002.
- 687 **Semeraro EF**, Marx L, Mandl J, Frewein MPK, Scott HL, Prévost S, Bergler H, Lohner K, Pabst G. Evolution of  
688 the analytical scattering model of live *Escherichia coli*. *Journal of Applied Crystallography*. 2021; 54(2). doi:  
689 10.1107/S1600576721000169.
- 690 **Sochacki KA**, Barns KJ, Bucki R, Weisshaar JC. Real-time attack on single *Escherichia coli* cells by the human  
691 antimicrobial peptide LL-37. *PNAS*. 2011; 108(16):E77–E81. doi: [10.1073/pnas.1101130108](https://doi.org/10.1073/pnas.1101130108).
- 692 **Sorensen CM**. Light Scattering by Fractal Aggregates: A Review. *Aerosol Science and Technology*. 2001;  
693 35(2):648–687. doi: [10.1080/027868201316900007](https://doi.org/10.1080/027868201316900007).
- 694 **Ulmschneider JP**. Charged Antimicrobial Peptides Can Translocate across Membranes without Forming  
695 Channel-like Pores. *Biophysical Journal*. 2017; 113(1):73–81. doi: <https://doi.org/10.1016/j.bpj.2017.04.056>.
- 696 **Wiese A**, Münstermann M, Gutschmann T, Lindner B, Kawahara K, Zähringer U, Seydel U. Molecular Mecha-  
697 nisms of Polymyxin B-Membrane Interactions: Direct Correlation Between Surface Charge Density and Self-  
698 Promoted Transport. *Journal of Membrane Biology*. 1998; 162(2):127–138.
- 699 **Wimley WC**, Hristova K. Antimicrobial peptides: Successes, challenges and unanswered questions. *Journal of*  
700 *Membrane Biology*. 2011; 239(1-2):27–34. doi: [10.1007/s00232-011-9343-0](https://doi.org/10.1007/s00232-011-9343-0).
- 701 **Wimley WC**. Describing the mechanism of antimicrobial peptide action with the interfacial activity model. *ACS*  
702 *Chemical Biology*. 2010; 5(10):905–917. doi: [10.1021/cb1001558](https://doi.org/10.1021/cb1001558).
- 703 **Yang Z**, Choi H, Weisshaar JC. Melittin-induced permeabilization, re-sealing, and re-permeabilization of *E. coli*  
704 membranes. *Biophysical Journal*. 2018; 114(2):368–379. doi: [10.1016/j.bpj.2017.10.046](https://doi.org/10.1016/j.bpj.2017.10.046).
- 705 Zemb T, Lindner P, editors. *Neutrons, X-rays and Light: Scattering Methods Applied to Soft Condensed Matter*.  
706 North-Holland delta series, Elsevier; 2002.
- 707 **Zhu Y**, Mohapatra S, Weisshaar JC. Rigidification of the *Escherichia coli* cytoplasm by the human antimicrobial  
708 peptide LL-37 revealed by superresolution fluorescence microscopy. *PNAS*. 2019; 116(3):1017–1026. doi:  
709 [10.1073/pnas.1814924116](https://doi.org/10.1073/pnas.1814924116).
- 710 **Zorko M**, Japelj B, Hafner-Bratkovič I, Jerala R. Expression, purification and structural studies of a short an-  
711 timicrobial peptide. *Biochimica et Biophysica Acta (BBA) - Biomembranes*. 2009; 1788(2):314–323. doi:  
712 [10.1016/j.bbamem.2008.10.015](https://doi.org/10.1016/j.bbamem.2008.10.015).
- 713 **Zweytick D**, Deutsch G, Andrä J, Blondelle SE, Vollmer E, Jerala R, Lohner K. Studies on Lactoferricin-derived  
714 *Escherichia coli* membrane-active peptides reveal differences in the mechanism of N-acylated versus nonacy-  
715 lated peptides. *Journal of Biological Chemistry*. 2011; 286(24):21266–21276. doi: [10.1074/jbc.M110.195412](https://doi.org/10.1074/jbc.M110.195412).
- 716 **Zweytick D**, Japelj B, Mileykovskaya E, Zorko M, Dowhan W, Blondelle SE, Riedl S, Jerala R, Lohner K.  
717 N-acylated peptides derived from human lactoferricin perturb organization of cardiolipin and phos-  
718 phatidylethanolamine in cell membranes and induce defects in *Escherichia coli* cell division. *PLoS ONE*. 2014;  
719 9(3):e90228. doi: [10.1371/journal.pone.0090228](https://doi.org/10.1371/journal.pone.0090228).



## 720 Appendix 1

### 721 Clusters of acylated peptide O-LF11-215

722 Peptide clusters formed by O-LF11-215 were investigated by Trp fluorescence and USAXS/SAXS.  
723 Trp spectra displayed a  $\lambda_{\max} \approx 336$  nm and a FWHM of about 67 nm, which can be related  
724 to a heterogeneous distribution of Trp with apolar surroundings (*Ladokhin et al., 2000*). In  
725 addition, O-LF11-215 exhibited Trp phosphorescence emission at about 450 nm, which usually  
726 is not measurable due to its dynamic quenching by oxygen and impurities in aqueous  
727 suspensions (*Cioni and Strambini, 2002*). Its presence suggests that a significant portion of  
728 Trp residues are buried in hydrophobic cores, with no access to the solvent and with a local  
729 high viscosity.

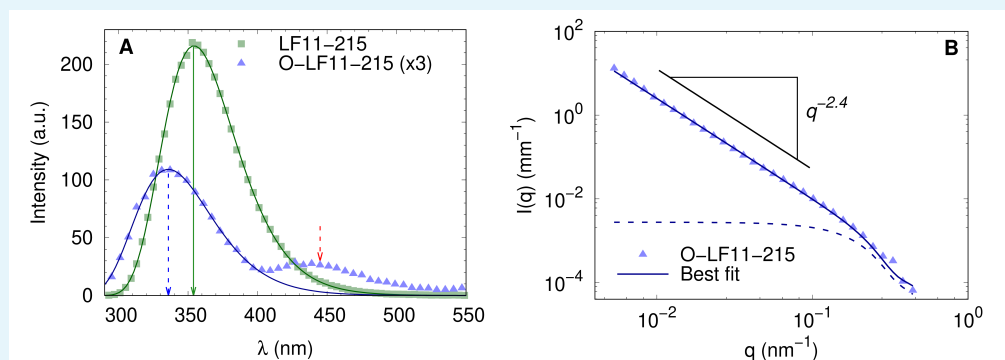

730 **Appendix 1 Figure 1.** (A) Trp fluorescence data of LF11-215 (green squares) and O-LF11-215 (blue  
731 triangles) at 100  $\mu\text{g/ml}$  (LF11-324 are not shown to avoid redundancy). Data were fitted with  
732 **Equation 4**. Arrows mark the maxima positions of the fluorescence and phosphorescence bands. (B)  
733 SAXS data of O-LF11-215 at 400  $\mu\text{g/ml}$ . The fit was performed with **Equation 5**.  
734

736 USAXS/SAXS data in the low  $q$ -range ( $q_{\min} \sim 0.005$   $\text{nm}^{-1}$ ) exhibited a featureless decay  
737 of intensity with a slope of  $f = 2.4$ . This slope value is typical for mass fractals, i.e. highly  
738 branched objects with high surface-to-volume ratio, while  $q_{\min}$  suggests a minimum aggregate  
739 size of  $\sim 2\pi/q_{\min} > 1$   $\mu$ . Furthermore, a Guinier term is needed to fit the shoulder at  
740 about  $q = 0.2$   $\text{nm}^{-1}$  corresponding to an average radius of gyration  $R_g \approx 10$  nm. Note that  
741 this feature also does not vanish for different choices of scaling constants for background  
742 subtraction. Interestingly, this value is way too high to describe O-LF11-215 monomers,  
743 whose expected radius of gyration would be  $< 1$  nm. Possibly, peptide monomers create  
744 smaller aggregates of mean size  $R_g \approx 10$  nm, which in turn form an heterogeneous and  
745 branched supramolecular structure with the characteristics of a mass fractal.

## 746 Appendix 2

### 747 Estimating the scattering contribution of OMVs

748 The prefactor of the scattering contribution from extracellular, independent objects used  
749 in **Equation 6** is  $I_{\text{OMV}}^0 = N_{\text{OMV}} V_{\text{OMV}}^2 \Delta\rho_{\text{OMV}}^2$ , where  $N_{\text{OMV}}$  is the number of OMVs,  $V_{\text{OMV}}$  is the  
750 volume of an OMV and  $\Delta\rho_{\text{OMV}}$  is average the SLD difference to the buffer. This definition of  
751 forward scattering (per single cell) is valid for every non-interacting object. Hence, to vali-  
752 date the assumption that this scattering contribution is related to OMVs, it is interesting to  
753 calculate possible  $N_{\text{OMV}}$ ,  $V_{\text{OMV}}$  and  $\Delta\rho_{\text{OMV}}$  values. Note that even if modelling OMVs as homo-  
754 geneous spheres appears as a crude first order approximation,  $R_{\text{OMV}}$  can be associated to its  
755 radius (within  $\sim 10\%$  confidence). Assuming the same lipid asymmetry as in the outer mem-  
756 brane, the inner leaflet of OMVs can be mimicked by a 3:1 mole mixture of palmitoyl-oleoyl-  
757 phosphatidylethanolamine (POPE) and palmitoyl-oleoyl-phosphatidylglycerol (POPG), respec-  
758 tively (*De Siervo, 1969; Lohner et al., 2008; Leber et al., 2018*). The SLD membrane profiles of  
759 these lipids have been thoroughly investigated (*Kučerka et al., 2012, 2015*). The outer leaflet  
760 might instead be dominated by LPS, whose lipid A possesses about 6 short C14:0 chains (*Kim*  
761 *et al., 2016*), and the polar region can be approximated as two PG units, in terms of molec-  
762 ular volume and SLD. In addition, LPS inner and outer core volumes and SLDs can be cal-  
763 culated from *Heinrichs et al. (1998)* and *Müller-Loennies et al. (2003)*, neglecting O-antigen  
764 chains for simplicity. Gathering all this information, similarly to the membrane structure  
765 estimation in *Semeraro et al. (2021)*, the vesicles would have a membrane thickness of 4.1  
766 nm and an average SLD of  $1.1 \times 10^{-3} \text{ nm}^{-2}$  (volume-weighted averages). The lumen of OMVs  
767 can be quite diversely composed (*Beveridge, 1999*). We tentatively assigned the SLD of the  
768 periplasmic space of the end-state system, i.e.  $9.68 \times 10^{-4} \text{ nm}^{-2}$ .

769 Together with a buffer SLD of  $9.47 \times 10^{-4} \text{ nm}^{-2}$ , a measured  $I_{\text{OMV}}^0 = 1500 \pm 200 \text{ nm}$  and a  
770  $R_{\text{OMV}} = 15.4 \pm 0.6 \text{ nm}$ , for instance, then leads to the estimate  $N_{\text{OMV}} = 1200 \pm 400$  and a total  
771 lipid surface (inner and outer leaflets of all OMVs) of  $(4 \pm 2) \times 10^6 \text{ nm}^2$ .

772 **Appendix 3**

773 **Tryptophan fluorescence**

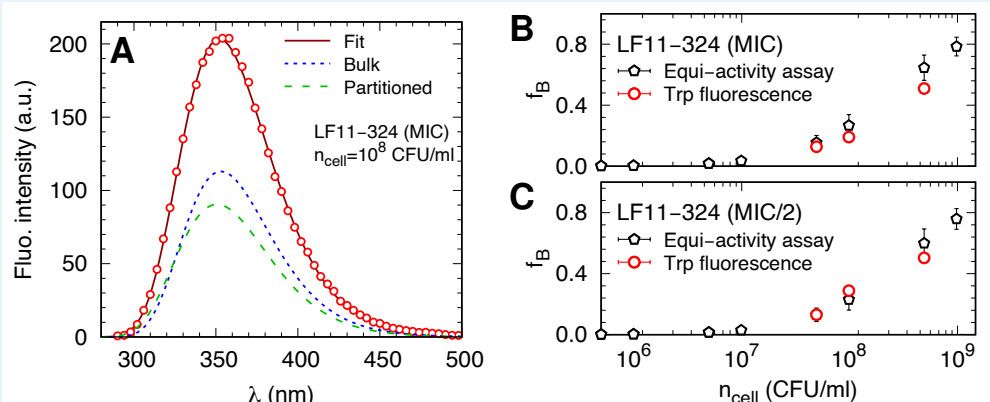

774

775

776

777

778

779

780

781

782

783

784

785

786

787

788

789

790

791

792

793

794

**Appendix 3 Figure 1. (A)** Example of Trp fluorescence analysis in LF11-324 systems. The solid line is the best fit and the dotted and dashed lines represent the Trp emissions from peptide in bulk and cell-associated, respectively. Data were fitted with **Equation 4**. **(B-C)** Comparison between  $f_B$  values obtained from the Trp fluorescence analysis (red dots) and the equi-activity analysis from the susceptibility assay (black diamonds).

The native fluorescence of the single Trp residue present in LF11 peptides was exploited to validate the partitioning investigation through the equi-activity analysis. For every system, emission signals from partitioned peptides exhibited a weak blue-shift, with  $\lambda_{\max}^B$  values in the range 346–354 nm for LF11-215, and 340–350 nm for LF11-324.  $\Gamma_B$  values showed no significant variations, instead. Interestingly, these values are consistent with a scenario in which a significant amount of partitioned peptides are heterogeneously dispersed in a polar environment and in a configuration allowing full dynamics of the Trp residues (**Burstein and Emelyanenko, 1996; Ladokhin et al., 2000**). This is consistent with the  $N_p^{\max}/N_B$  values estimated via  $\zeta$ -potential measurements, suggesting that a relevant portion of partitioned AMPs are still in monomeric state in the cytosol

Given that  $f_B = n_{\text{cell}}N_B/(N_A[P])$ ,  $f_B$  values extracted via Trp fluorescence were compared with those obtained from the antimicrobial activity assays at  $[P] = \text{MIC}$  and  $\text{MIC} \times 0.5$  (LF11-215 data not shown). These two independent methods gave comparable  $f_B$ , confirming the validity of  $N_B$  values.

795 **Appendix 4**

796 **Statistics of bacterial inhibition**

797 Assuming that the AMP-induced delayed bacterial growth is entirely due to a lower number  
 798 density of survived cells (*Marx et al., 2021b*), the inhibited fraction of cells,  $\phi_{IG}$ , as a function  
 799 of peptide and cell concentrations was fitted with a heuristic approach. Specifically, we used  
 800 the sigmoidal Gompertz function  
 801

$$F([P]; b, c) = \exp[-b \exp(-c[P])], \quad (8)$$

802 where  $[P]$  is the total peptide molar concentration, and  $b$  and  $c$  are related, respectively, to  
 803 the position and width of the sigmoidal.  
 804

$F([P]; b, c)$  can be associated to a cumulative distribution function (CDF), that is, it measures the probability of finding a certain number (or fraction) of inhibited cells at a given peptide concentration. This allows to derive the probability density function (PDF) by calculating the derivative,  $f([P]; b, c) = \partial F([P]; b, c) / \partial [P] = \partial \phi_{IG} / \partial [P]$ , as well as the inverse CDF,  $F^{-1}(\phi_{IG}; b, c)$ , which maps  $\phi_{IG}$  values to the inhibitory peptide concentrations  $IC_x$ , where  $x$  is the corresponding inhibited bacterial percentage; by definition,  $IC_{99.9} \equiv \text{MIC}$ .

In addition, the set of  $b$  and  $c$  values as a function of  $n_{\text{cell}}$  can be interpolated to obtain, for example, a continuous trend of  $IC_x$  as a function of  $\phi_{IG}$ .

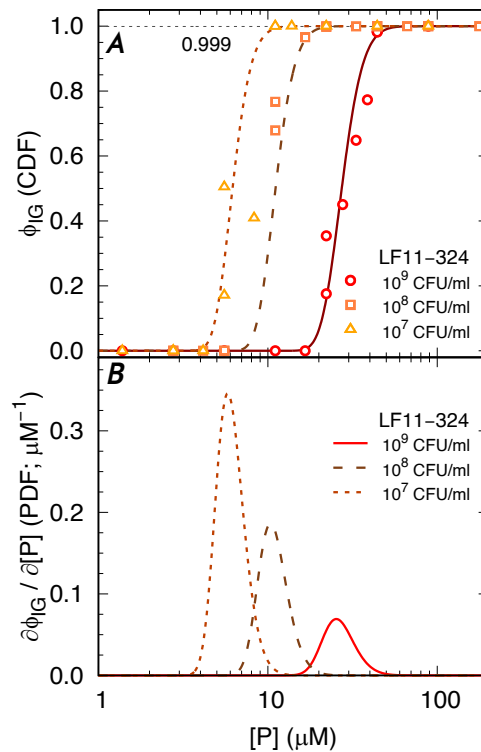

807 **Appendix 4 Figure 1. (A)** Selected  $\phi_{IG}$  data for LF11-324  
 808 and corresponding fits with the Gompertz function. **(B)**  
 809 Corresponding PDFs.  
 810

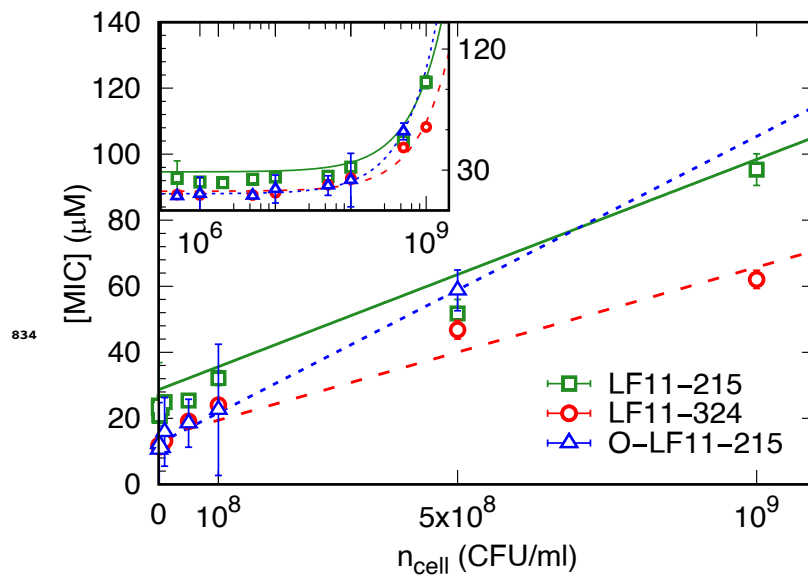

**Figure 1-Figure supplement 1.** MIC values as a function of  $n_{\text{cell}}$  for LF11-215 (green squares), LF11-324 (red dots) and O-LF11-215 (blue triangles) and best fits using [Equation 1](#) and [Equation 2](#).



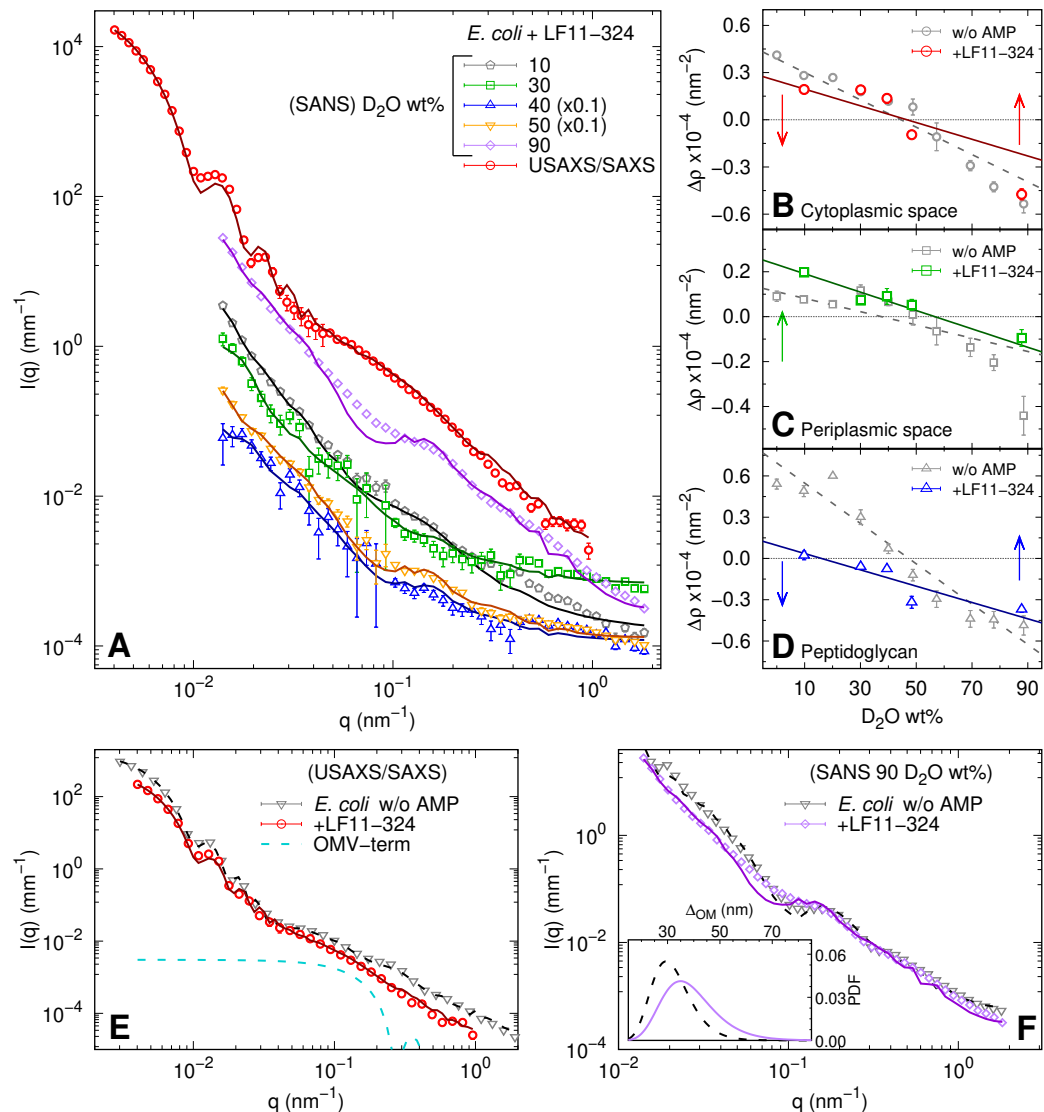

**Figure 1-Figure supplement 2.** (A) X-ray and neutron scattering data of bacterial systems after one hour incubation with LF11-324 (end-states) at the MIC (SANS) and 1.2xMIC (SAXS). Lines are the best fits using Equation 6. (B-D) Scattering length contrasts as a function of D<sub>2</sub>O concentration (wt%) in the medium for the cytoplasm,  $\Delta\rho_{CP}$ , periplasm,  $\Delta\rho_{PP}$ , and peptidoglycan layer,  $\Delta\rho_{PG}$ . Gray symbols are the values reported in absence of peptides [data adapted from Semeraro et al. (2021)]. Solid and dashed lines correspond to linear regressions. (E) Comparison between SAXS curves from bacterial end-states and a reference sample without peptides [data adapted from Semeraro et al. (2021)]. The blue dashed line represents the additional  $I_{OMV}$  term whereas the fits refer to Equation 6. (F) Comparison between SANS curves from bacterial end-states and a reference sample without peptides [data adapted from Semeraro et al. (2021)] in the case of 90 D<sub>2</sub>O wt%. Lines are the best fits with Equation 6. The inset shows the log-normal probability distribution function (PDF) of the inter-membrane distance with (dashed purple line) and without LF11-324 (solid black line). (E-F) The intensities are on absolute scale and normalized by the cell concentration.

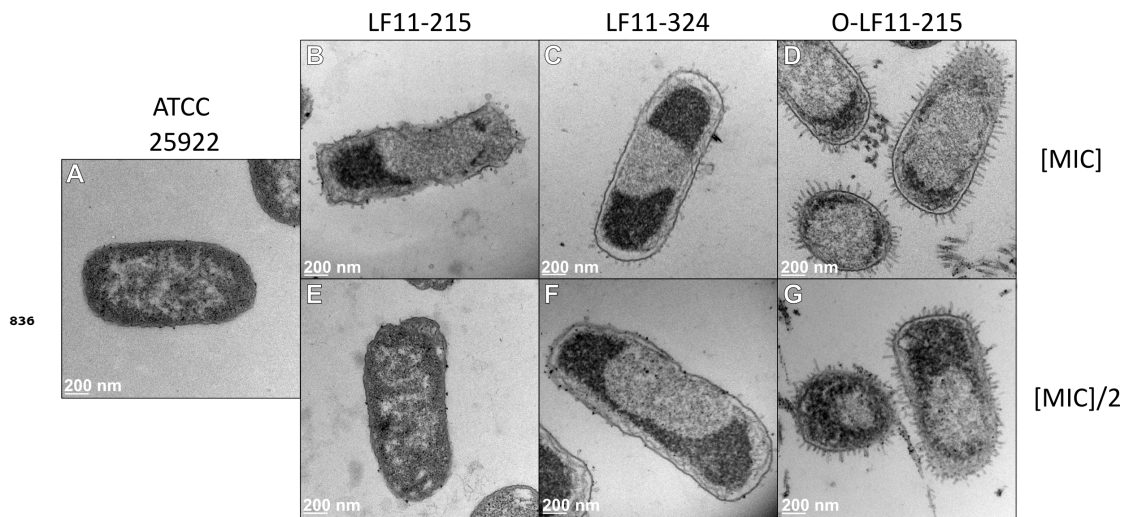

**Figure 1-Figure supplement 3.** TEM images of *E. coli* ATCC (A) and end-states in the presence of LF11-215 (B,E), LF11-324 (C,F) and O-LF11-215 (D,G). All systems were probed at the MICs (B,C,D) and half the MICs (E,F,G).

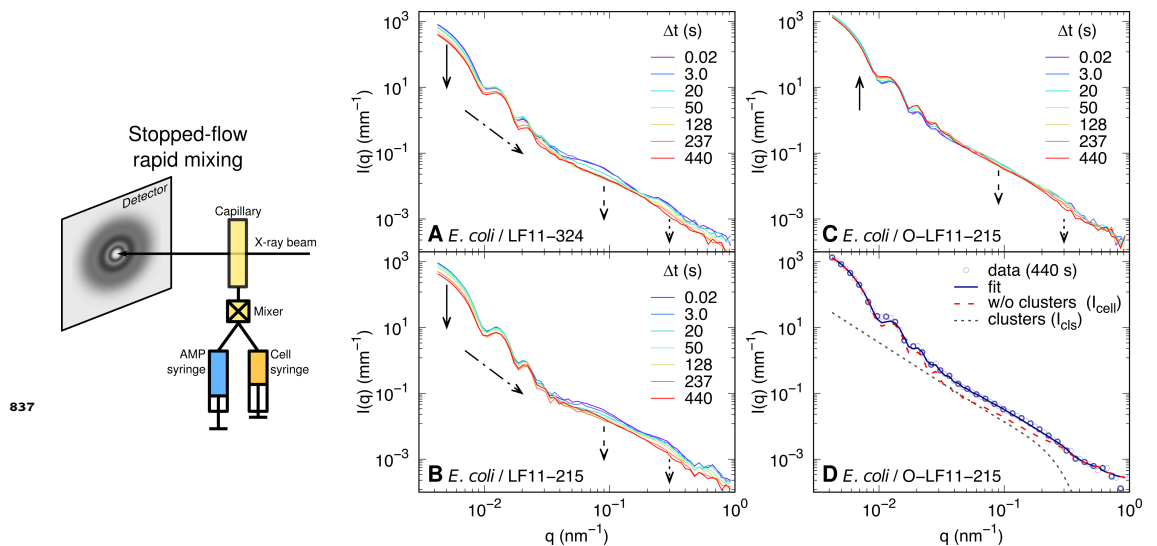

**Figure 2-Figure supplement 1.** Schematic of the stopped-flow rapid mixing set-up used for USAXS/SAXS experiments and kinetic changes of USAXS/SAXS curves of bacterial samples upon mixing with LF11-324 at MIC $\times$ 1.2 (A), LF11-215 at MIC $\times$ 1.6 (B) and O-LF11-215 at MIC $\times$ 1.7 (C). The arrows highlight the most significant variations of intensity, such as the decrease of forward scattering (A-B); the evolution of the low- $q$  oscillation profile (A-C); the disappearance of the feature at  $q \sim 0.3 \text{ nm}^{-1}$  (A-C); the decrease of  $I_{\text{cell}}$  (A-B) and of  $I_{\text{clu}}$  (C) at  $q \sim 0.1 \text{ nm}^{-1}$ . (D) Example of the combination of  $I_{\text{cell}}$  and  $I_{\text{clu}}$  in the case of applying O-LF11-215 (see [Equation 6](#)).

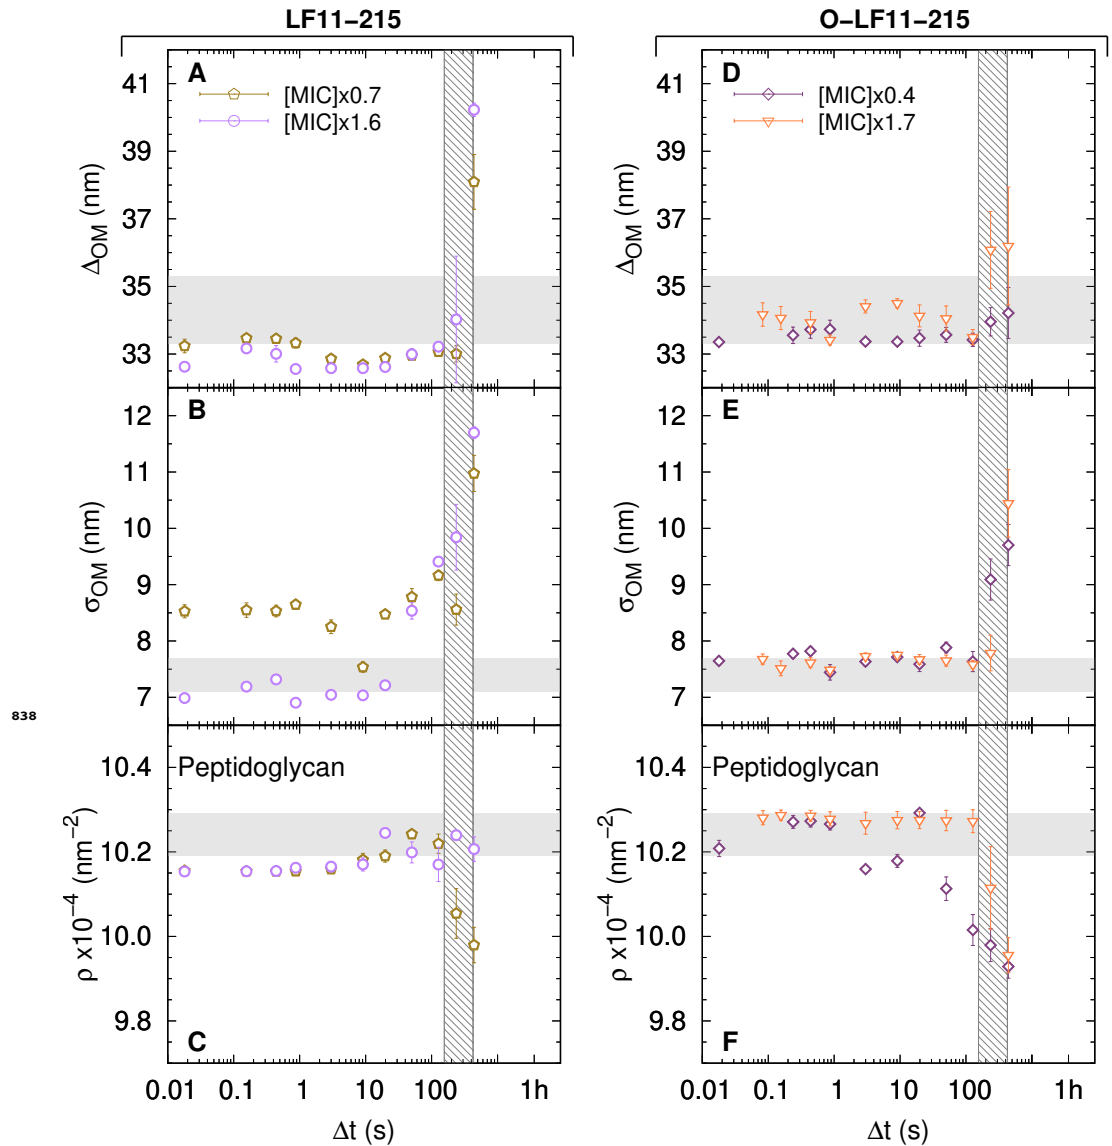

**Figure 2-Figure supplement 2.** (A-C) Kinetics of the adjustable parameters upon mixing with two concentrations of LF11-215. These are, the intermembrane distance ( $\sim$  periplasm thickness) (A), its deviation from the average value (B), and the peptidoglycan SLD (C). (D-F) Kinetics of the adjustable parameters upon mixing with two concentrations of O-LF11-215. The parameters are the intermembrane distance ( $\sim$  periplasm thickness) (D), its deviation (E), and peptidoglycan SLD (F). Thick gray bands mark the degree of confidence from bacterial systems w/o peptides [see [Table 1](#) and [Semeraro et al. \(2021\)](#)]. The vertical gray grid in (A-F) is an approximated, concentration-independent time range during which the cell-wall damage occurs.

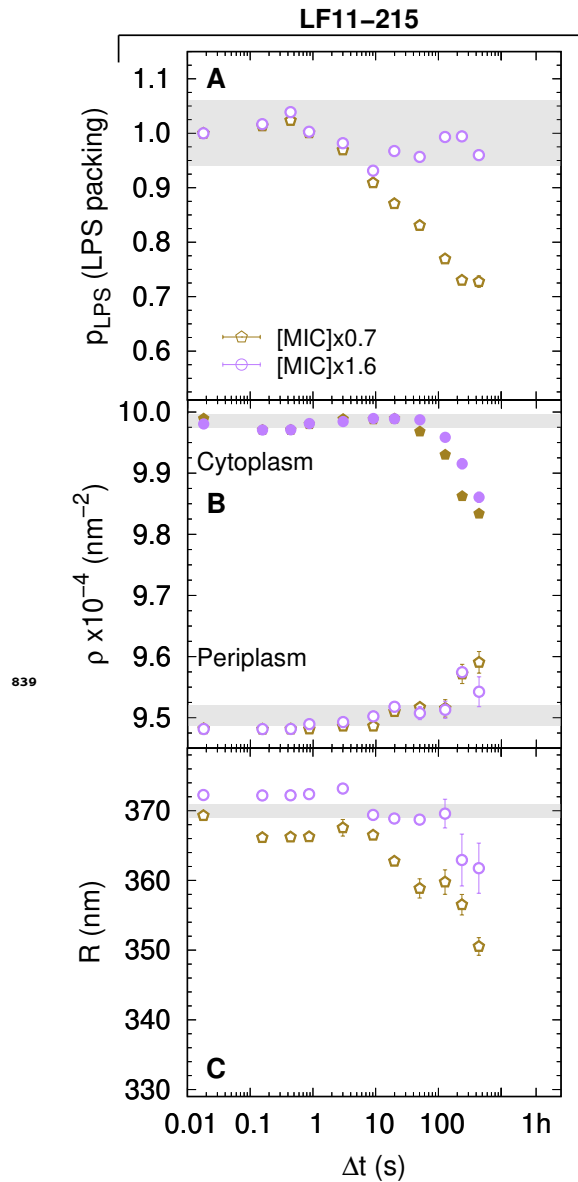

**Figure 2-Figure supplement 3. (A-C)** Kinetics of the adjustable parameters upon mixing with two concentrations of LF11-215. These parameters are the LPS packing (**A**); the cytoplasm and periplasm SLDs (**B**); and the minor radius of the cell (**C**). Thick gray bands mark the degree of confidence from bacterial systems w/o peptides [see [Table 1](#) and [Semeraro et al. \(2021\)](#)], except for (**C**), where they refer to the average of the current cell radii at  $\Delta t = 0.0175$  s.

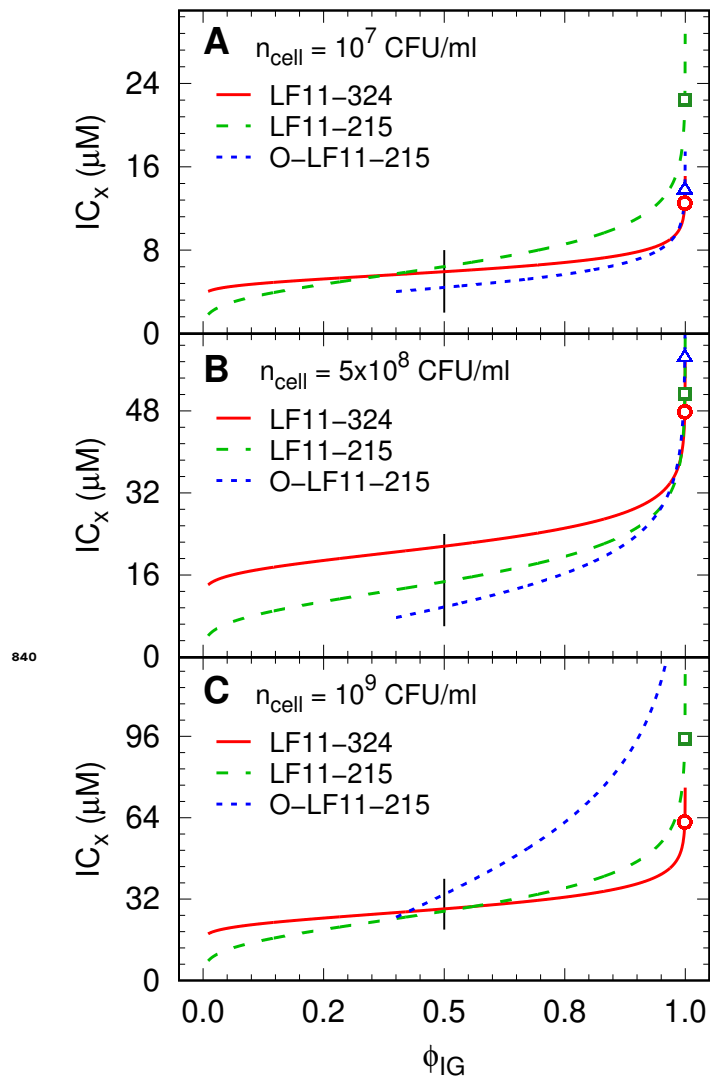

**Figure 4-Figure supplement 1. (A-C)** Inhibitory concentration ( $IC_x$ ) as a function of inhibited fractions  $\phi_{IG}$  [inverse CDF,  $F^{-1}(x; b, c)$ ] for different peptide and cell concentrations. Low  $\phi_{IG}$  values for O-LF11-215 were not accessible due to the high noise-to-signal ratio. Symbols mark the MICs for LF11-324 (circles), LF11-215 (squares) and O-LF11-215 (triangles), and black lines mark the range of  $IC_{50}$ . The level of confidence is not displayed for sake of clarity.  $IC_x$  values have an about 10% relative error.



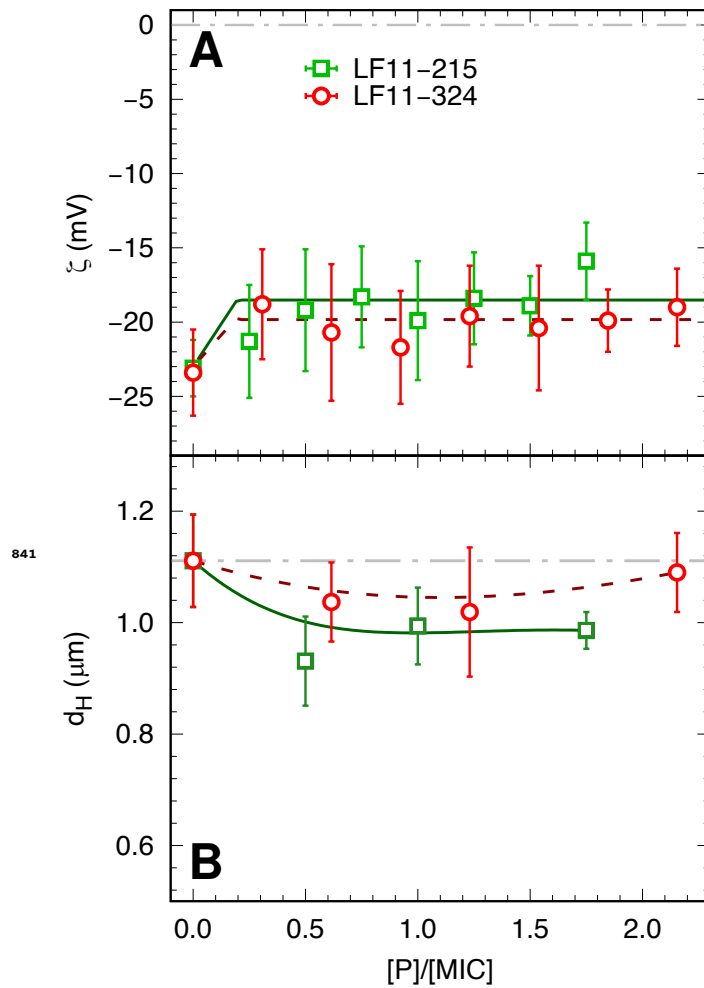

**Figure 5-Figure supplement 1.**  $\zeta$ -potential (**A**) and size (**B**) measurements as a function of peptide concentration (normalized by the respective MICs of LF11-215 and LF11-324 peptides). Lines are guides for the eye.

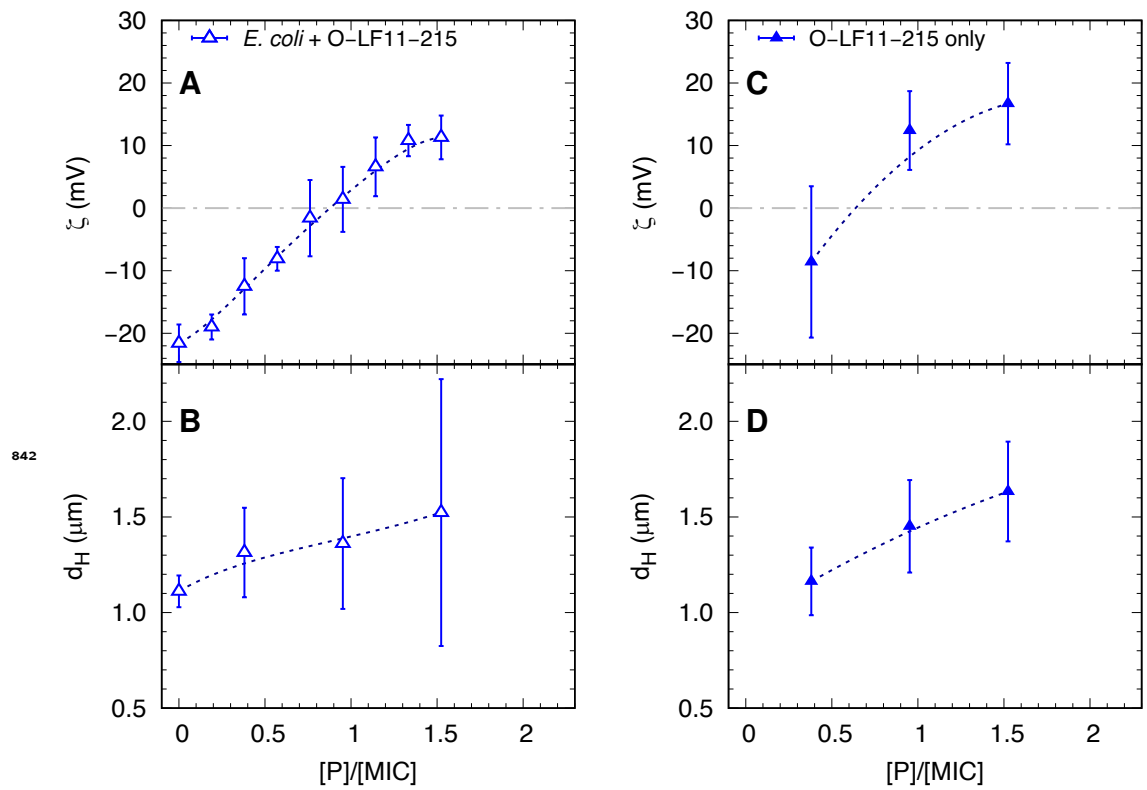

**Figure 5-Figure supplement 2.** Comparison between  $\zeta$ -potential (A,C) and size (B,D) measurements of O-LF11-215 AMP alone and mixed with *E. coli* as a function of peptide concentration (normalized by the MIC of O-LF11-215).

**A**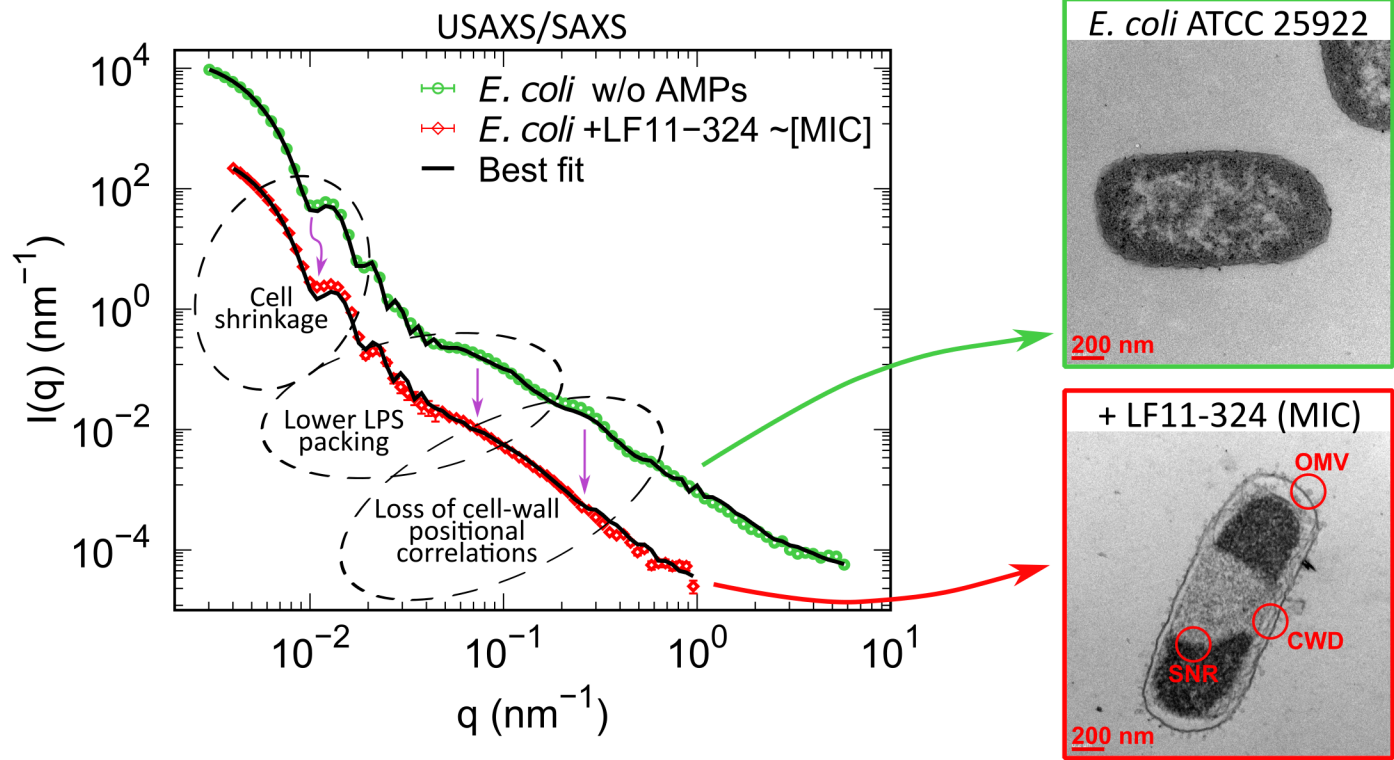**B**

Electron microscopy  
imaging

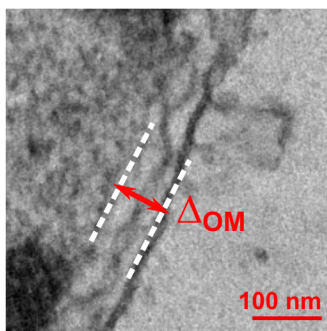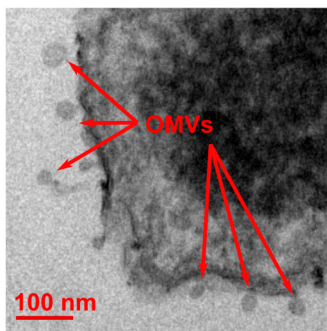

SAXS/SANS  
data analysis

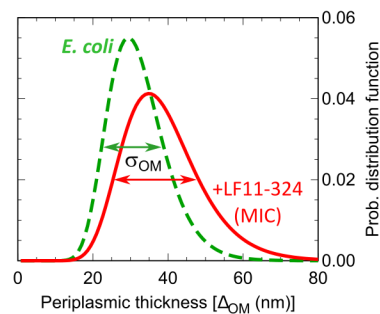

Diameter  $\sim 30 \text{ nm}$  ( $2\langle R \rangle_{OMV}$ )

Number per single cell  
 $\sim 800\text{-}1600$  ( $N_{OMV}$ )

**C**

+ O-LF11-215 (MIC)

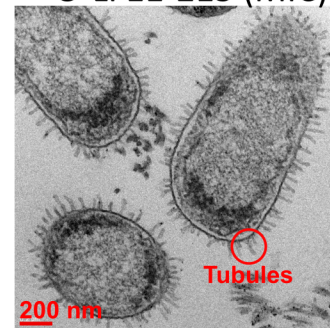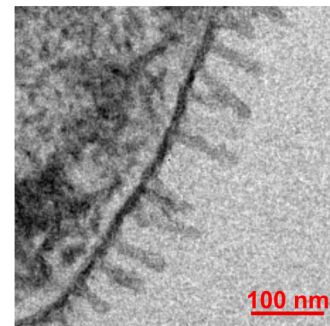

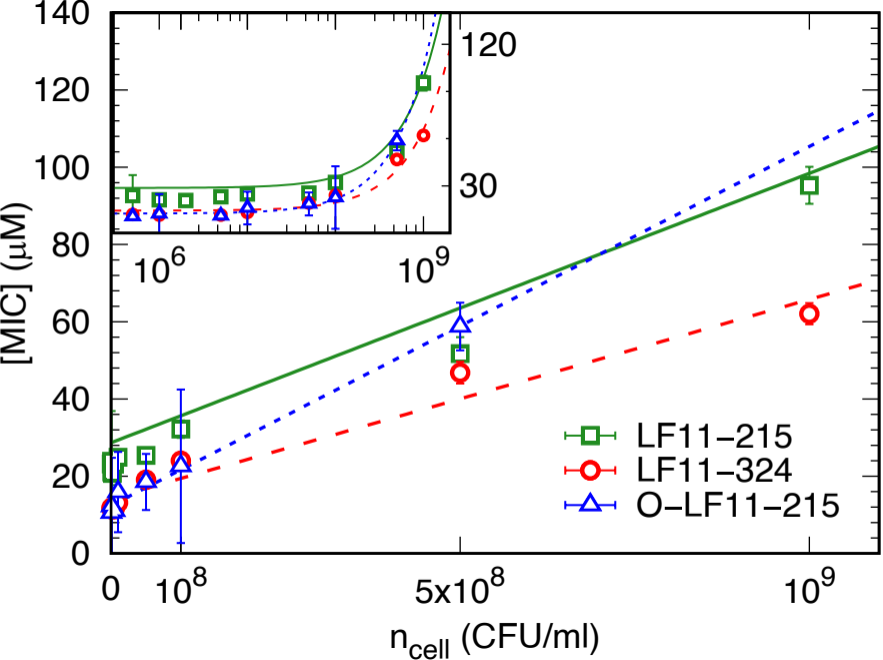

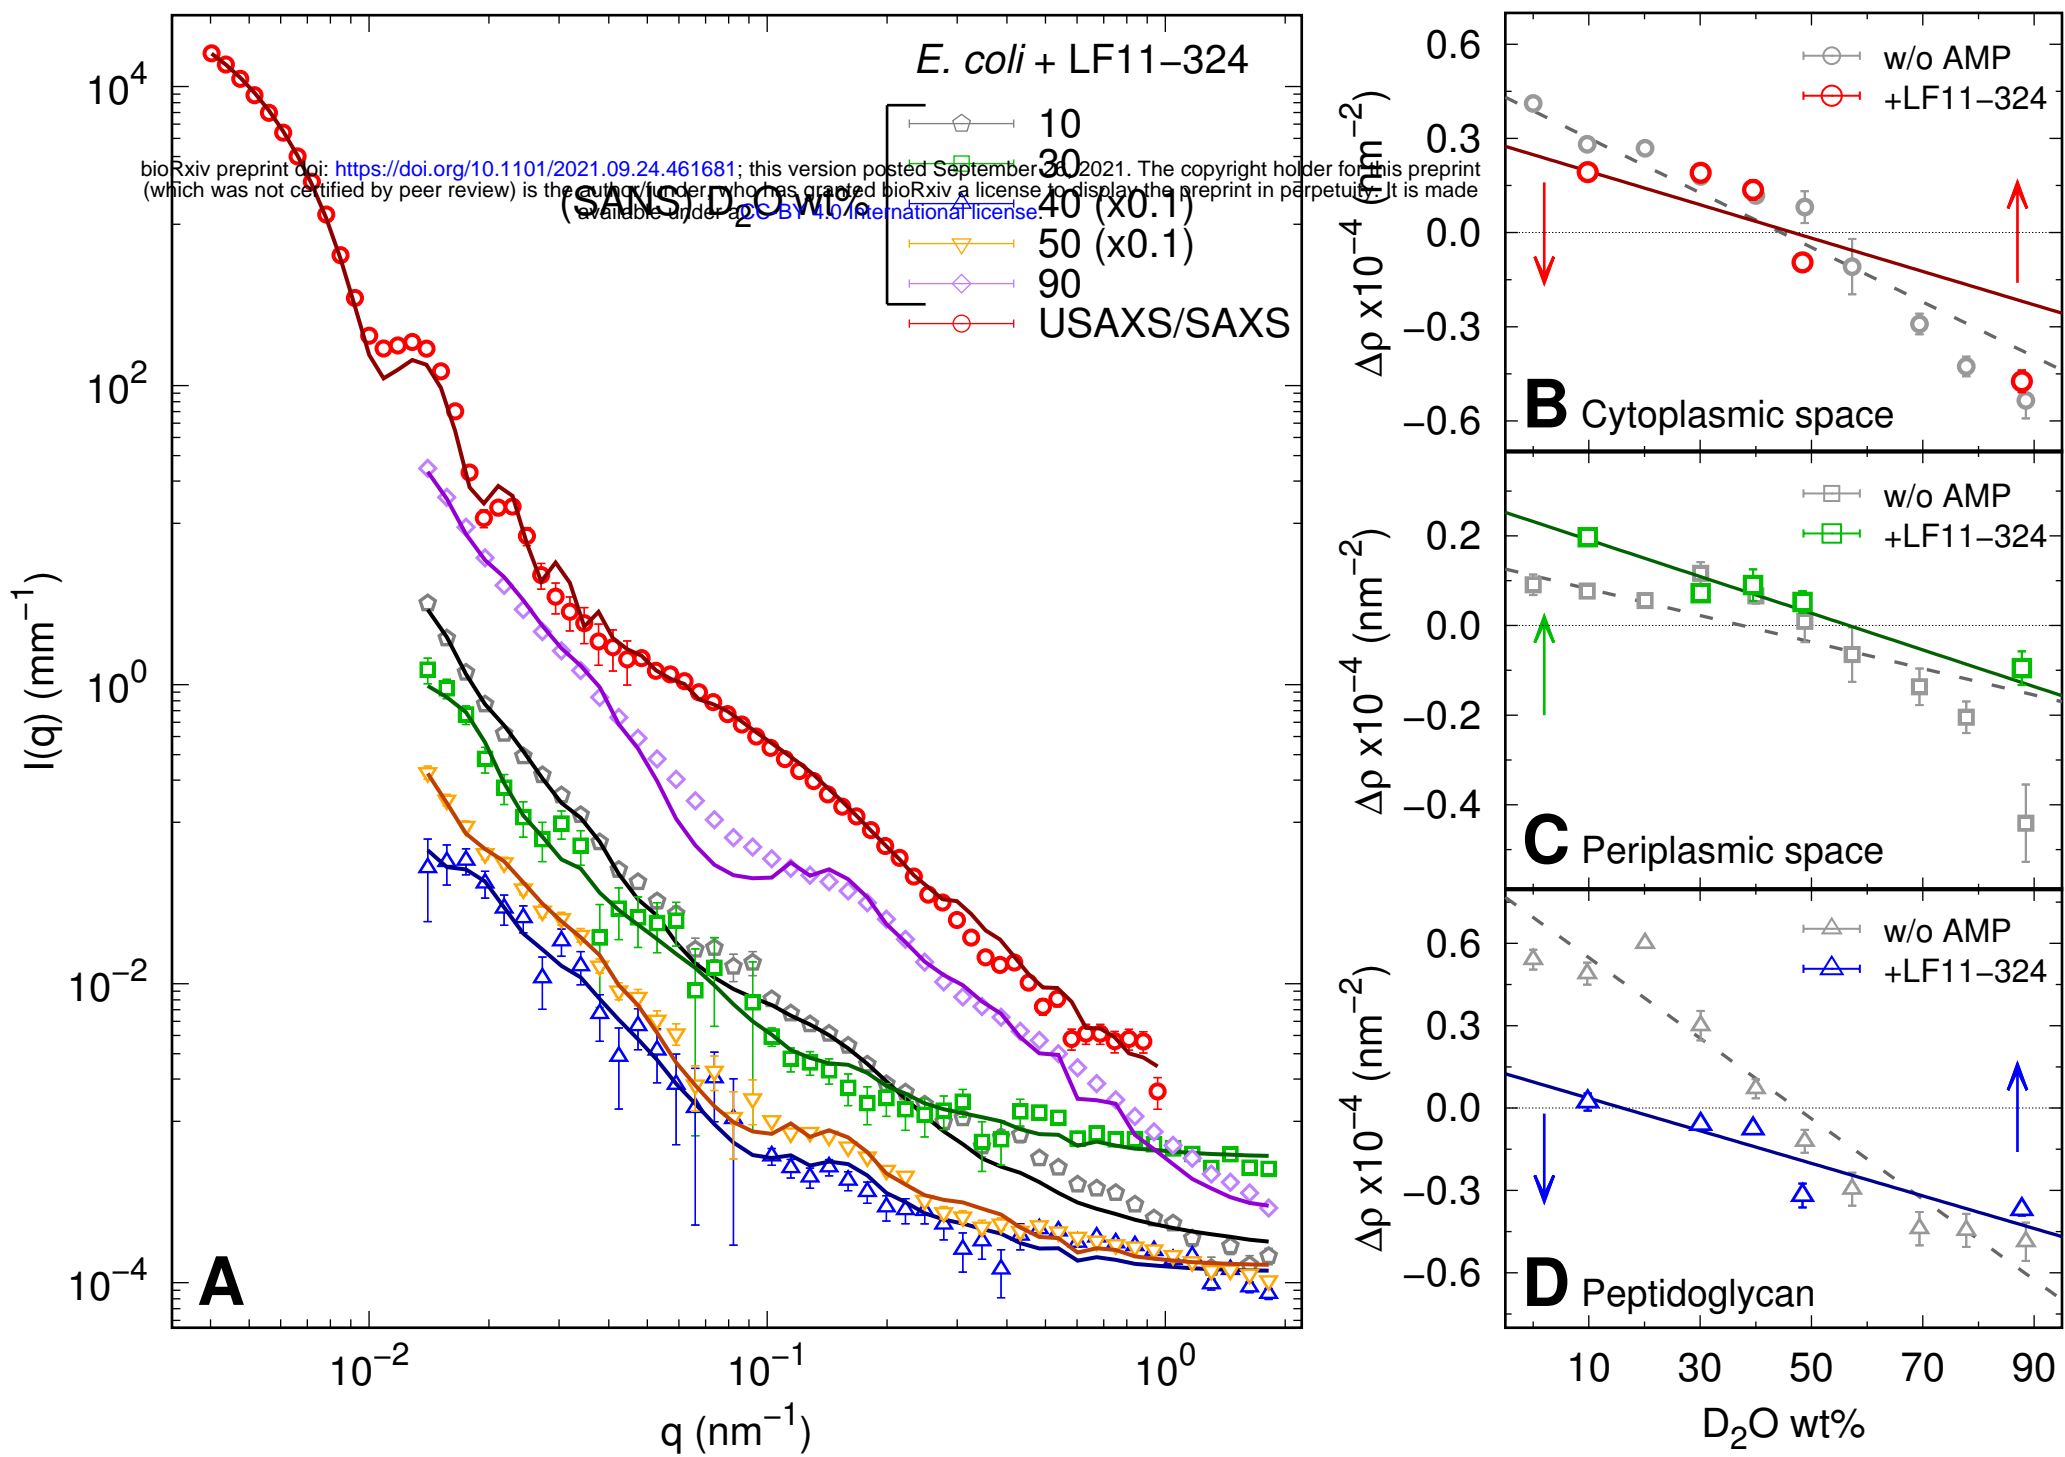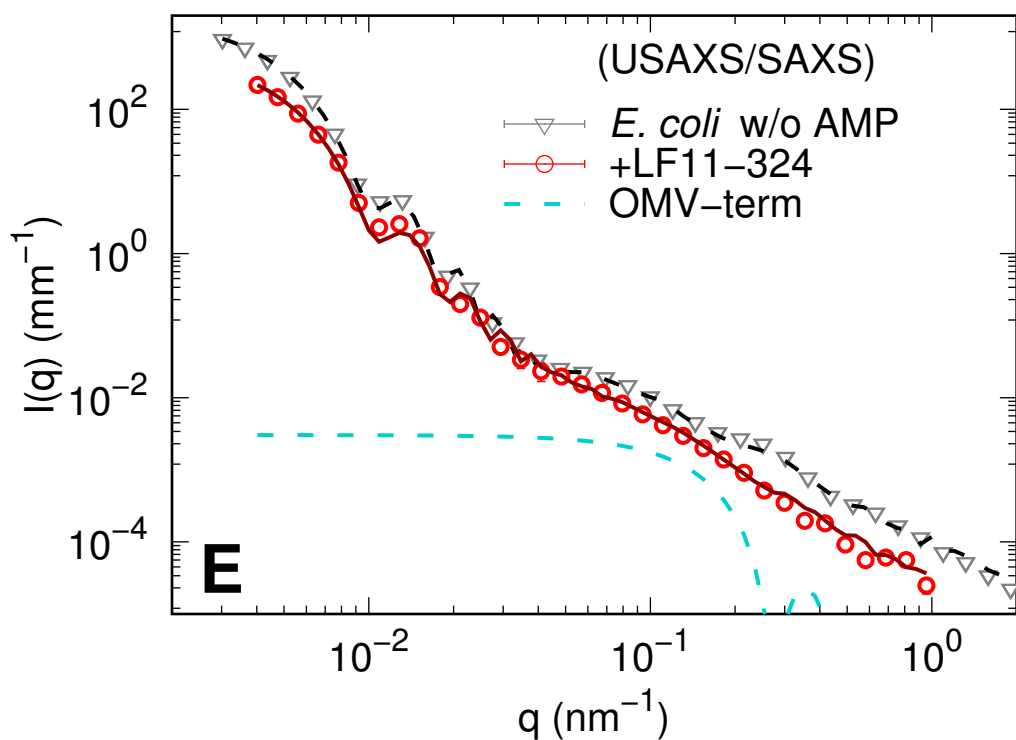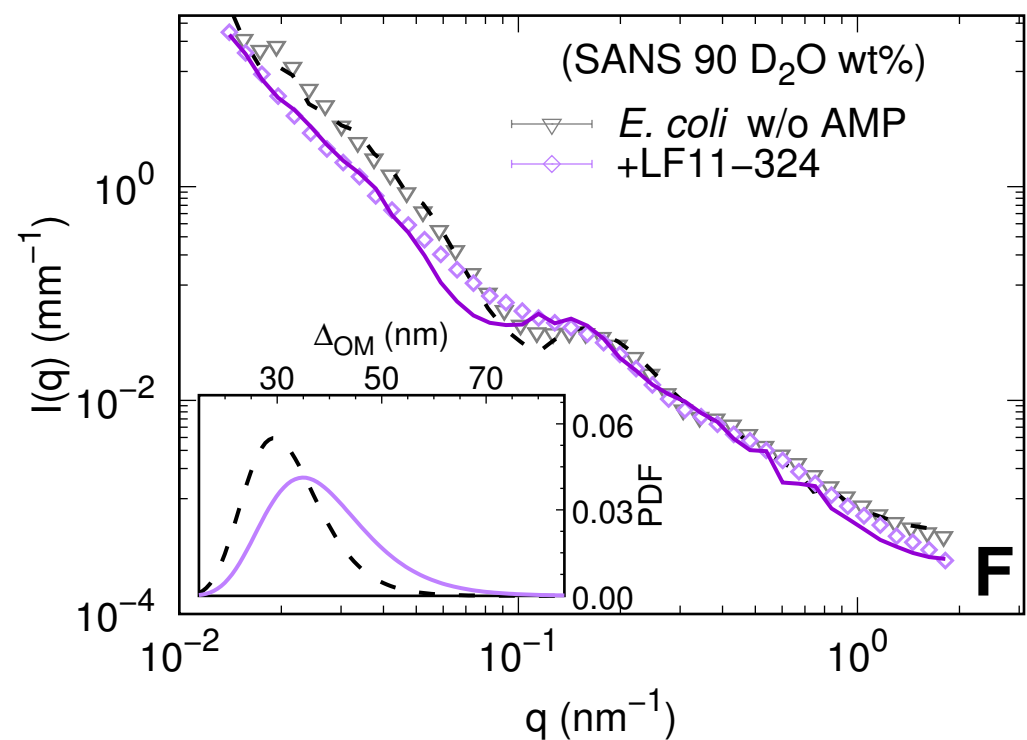



LF11-215

LF11-324

O-LF11-215

ATCC  
25922

A

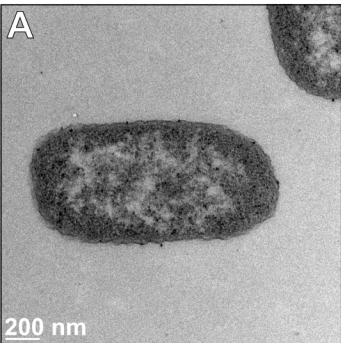

B

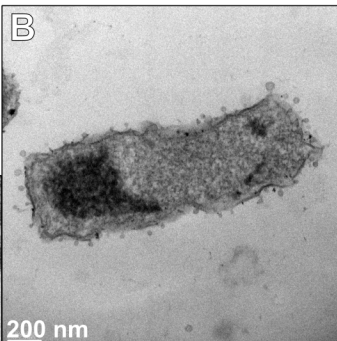

C

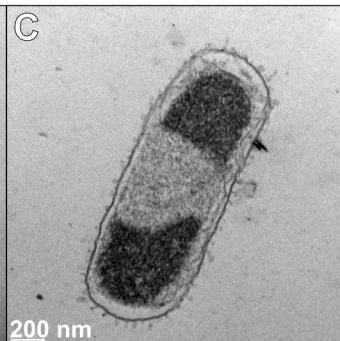

D

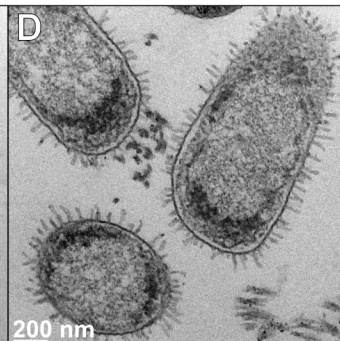

200 nm

200 nm

200 nm

E

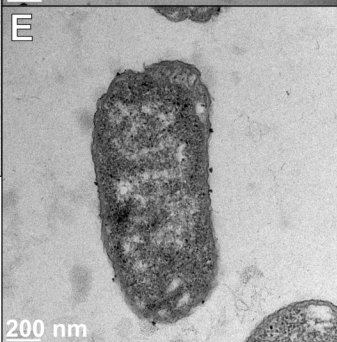

F

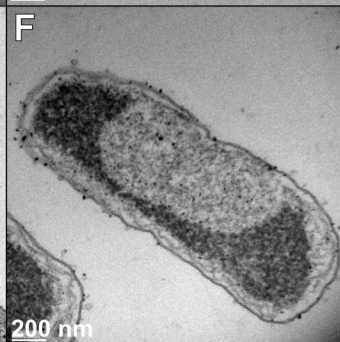

G

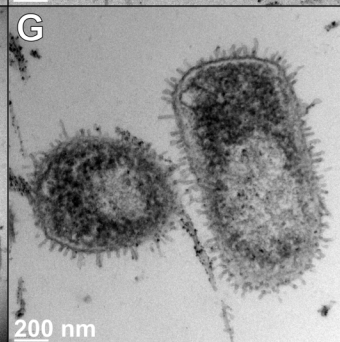

200 nm

200 nm

200 nm

[MIC]

[MIC]/2

# LF11-324

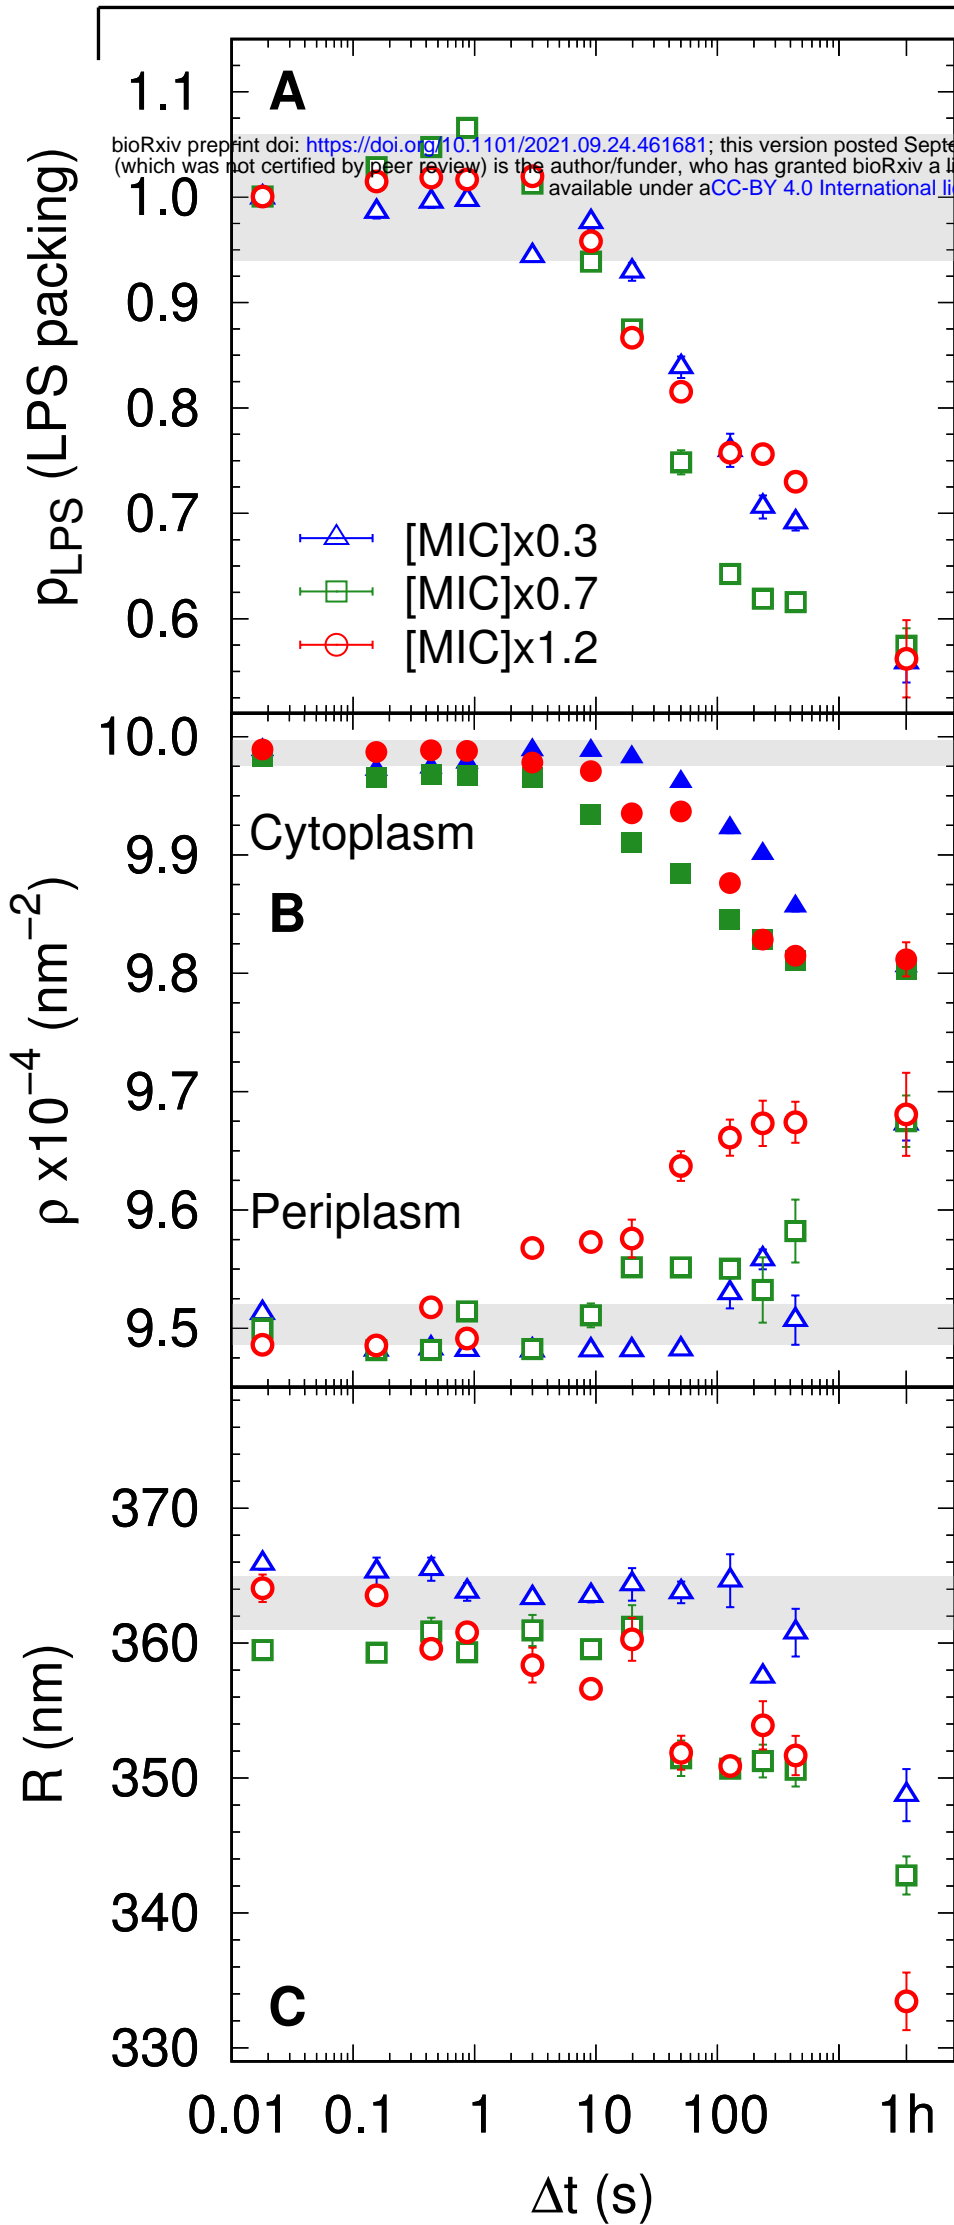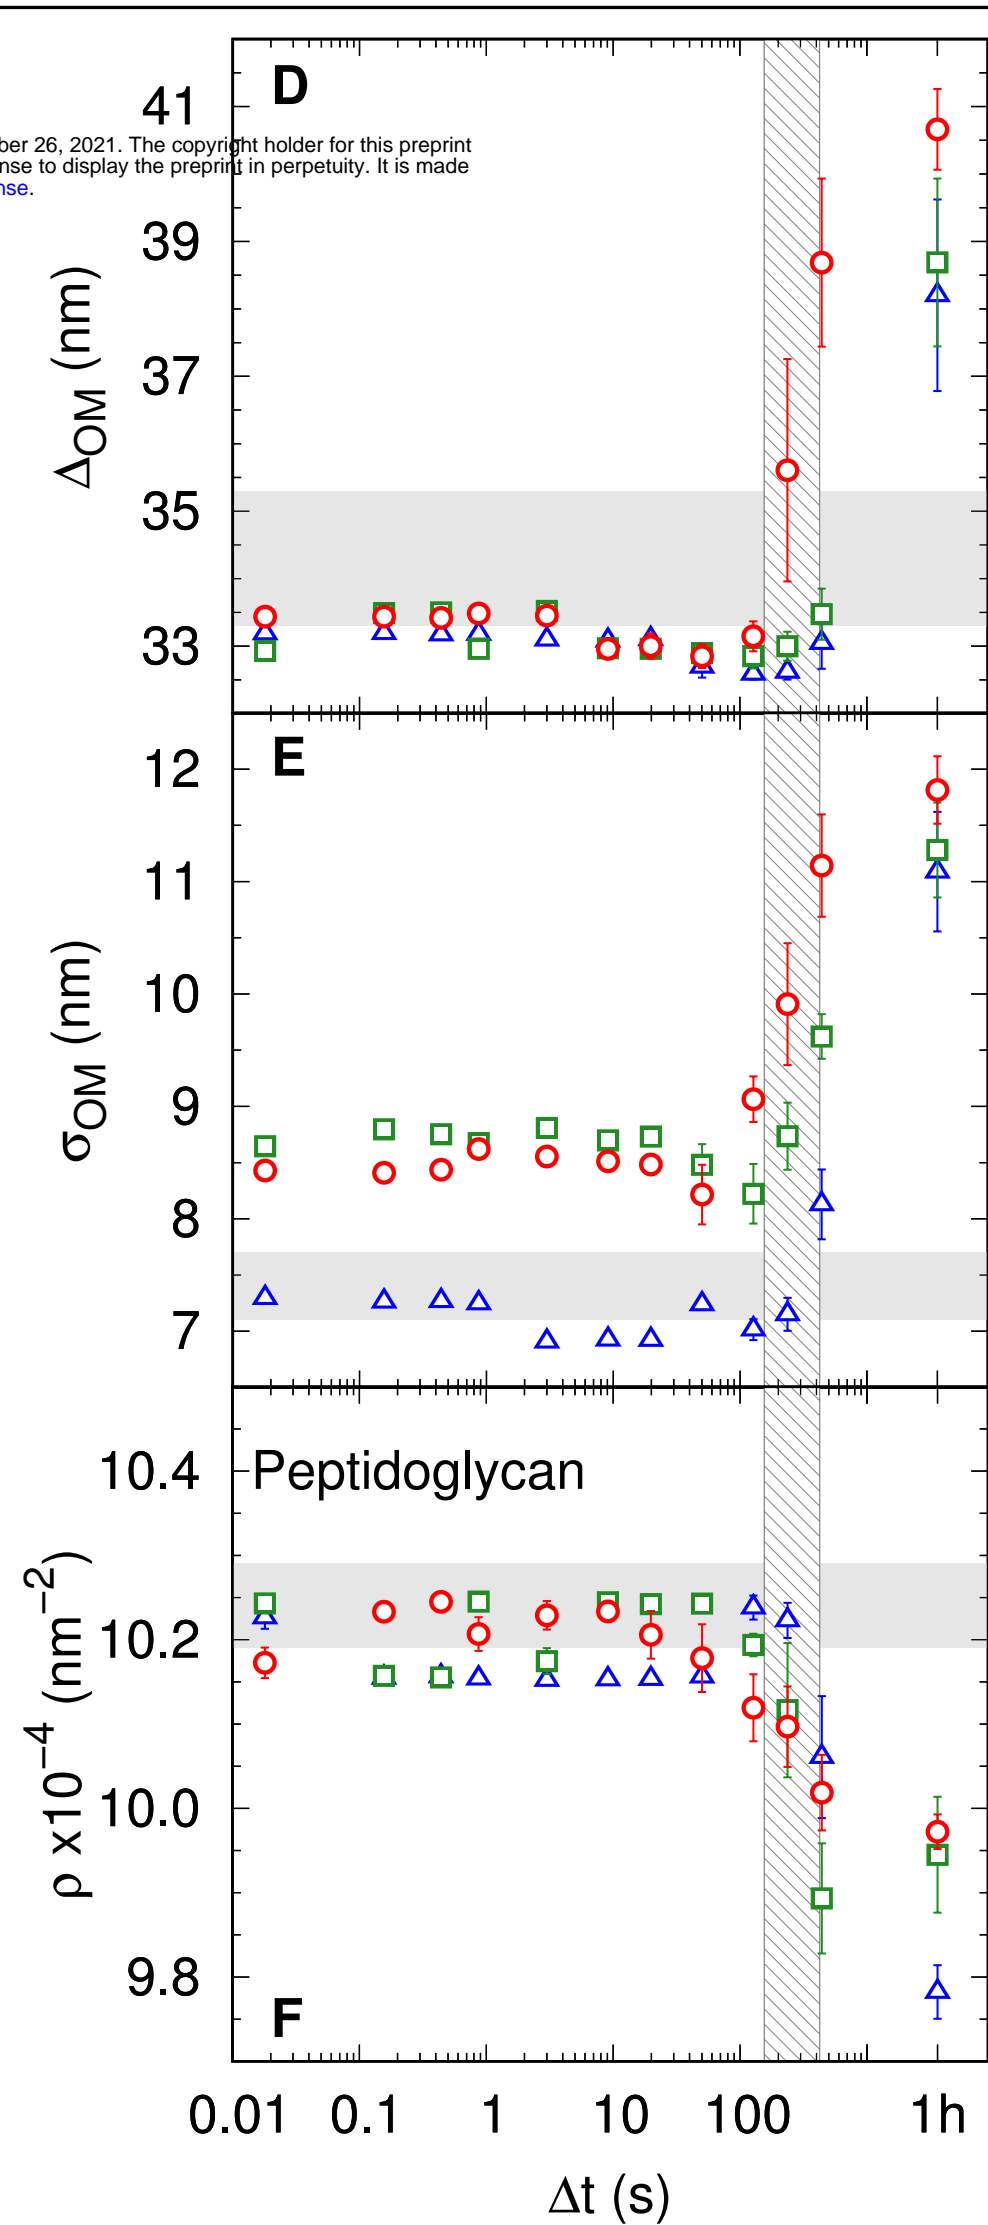

# O-LF11-215

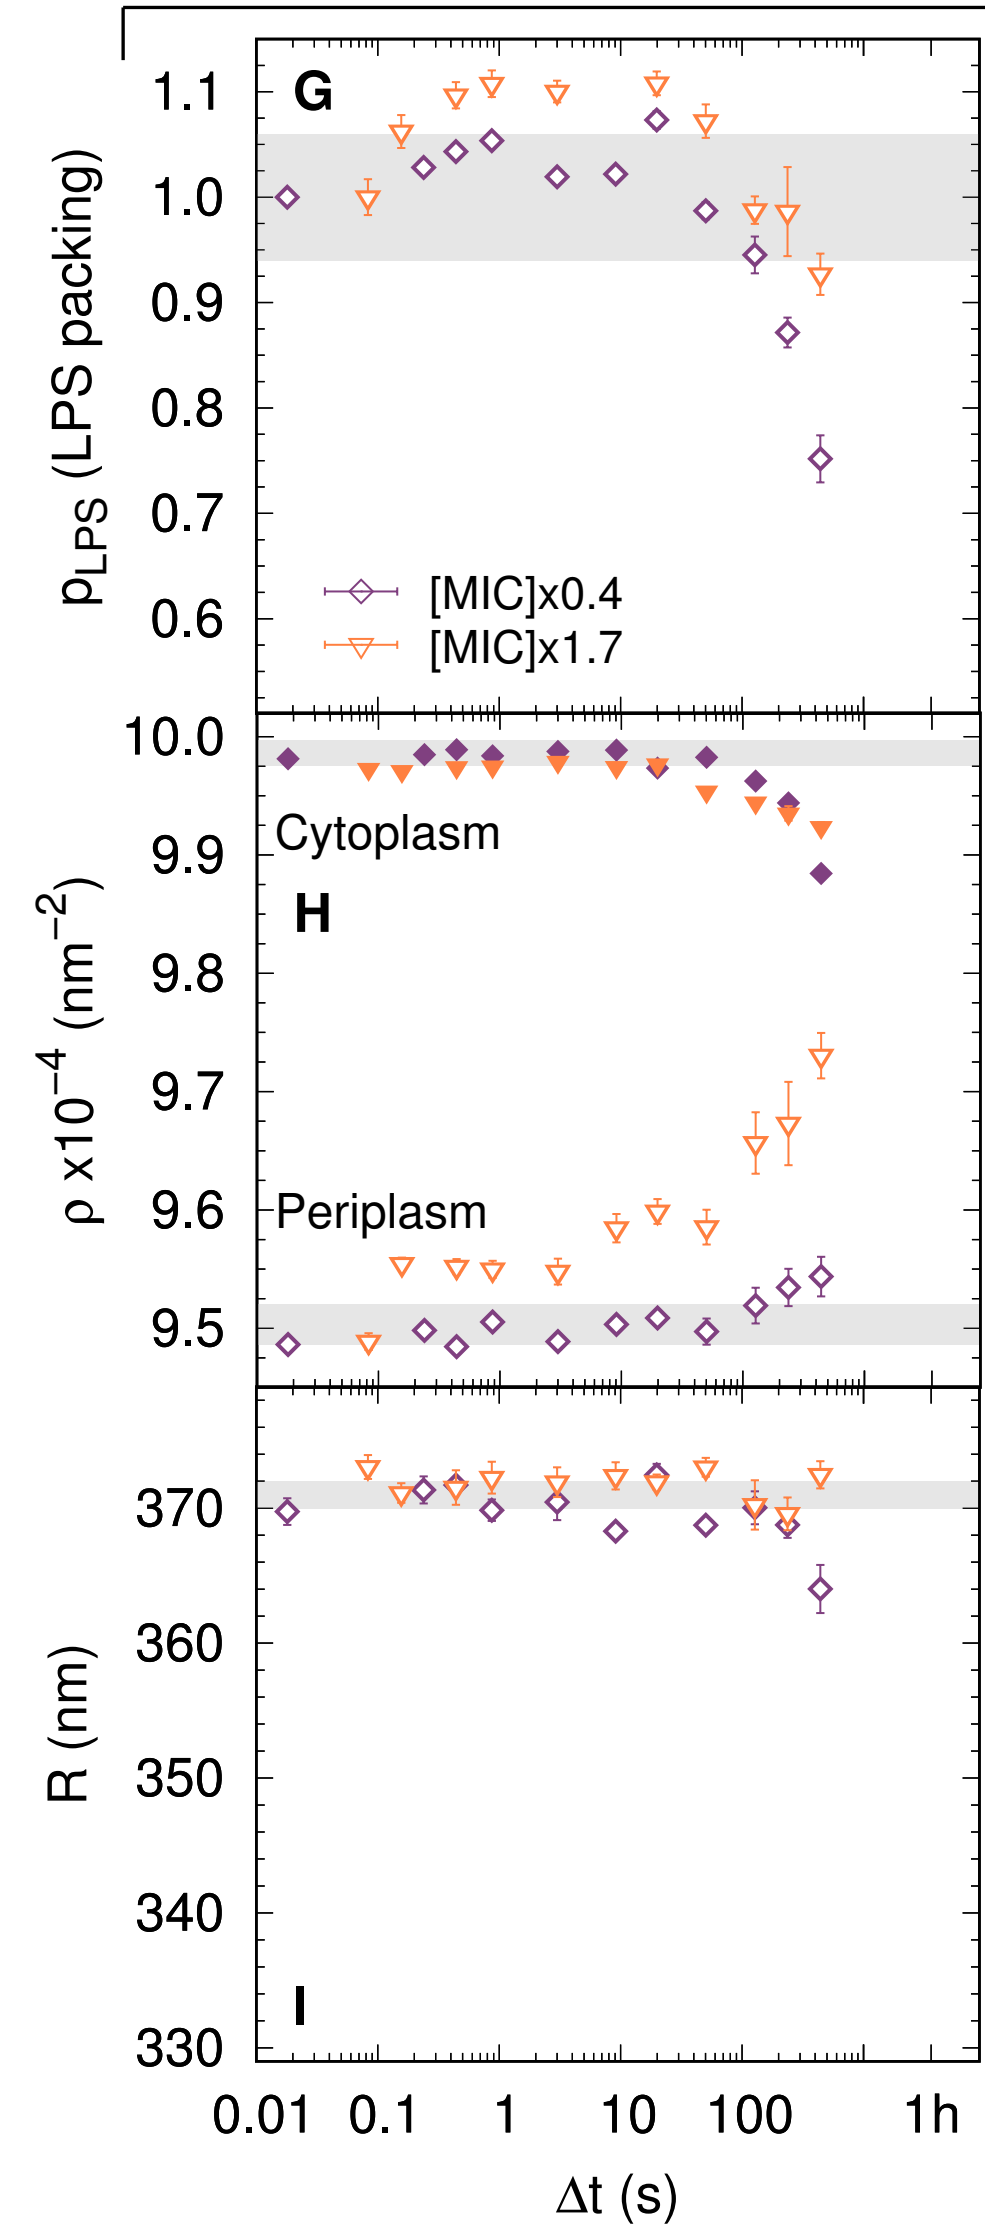

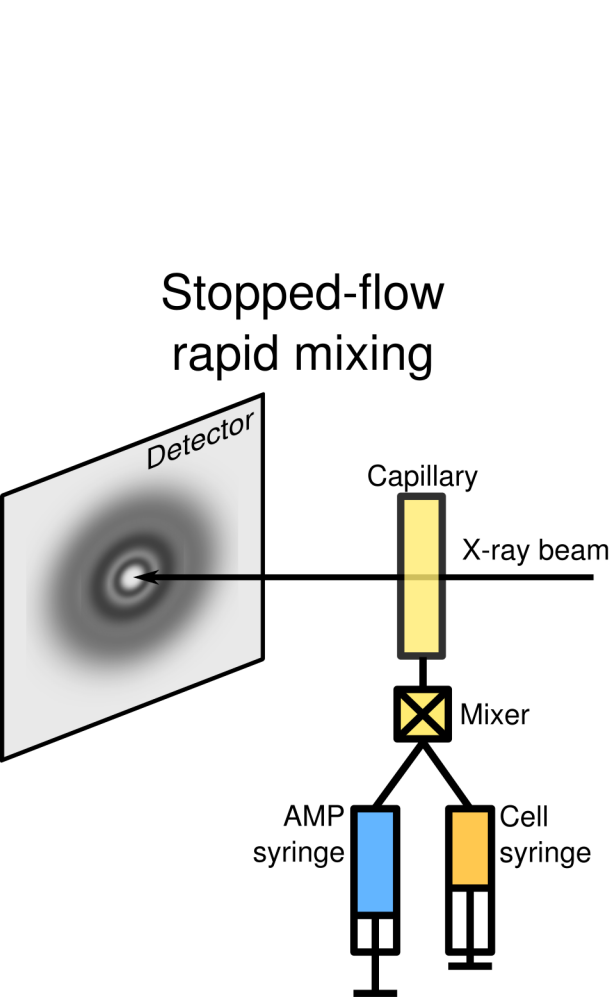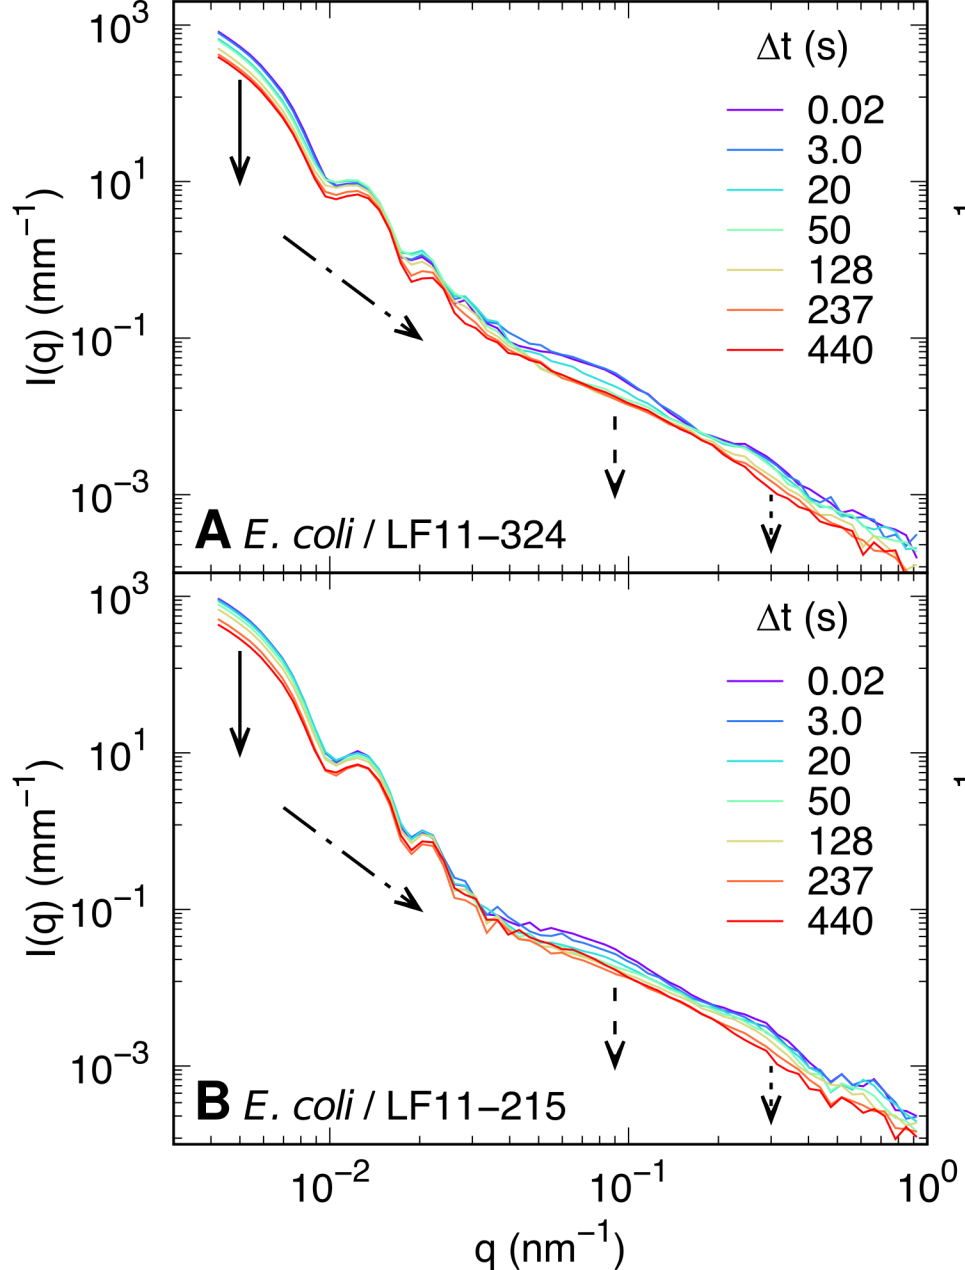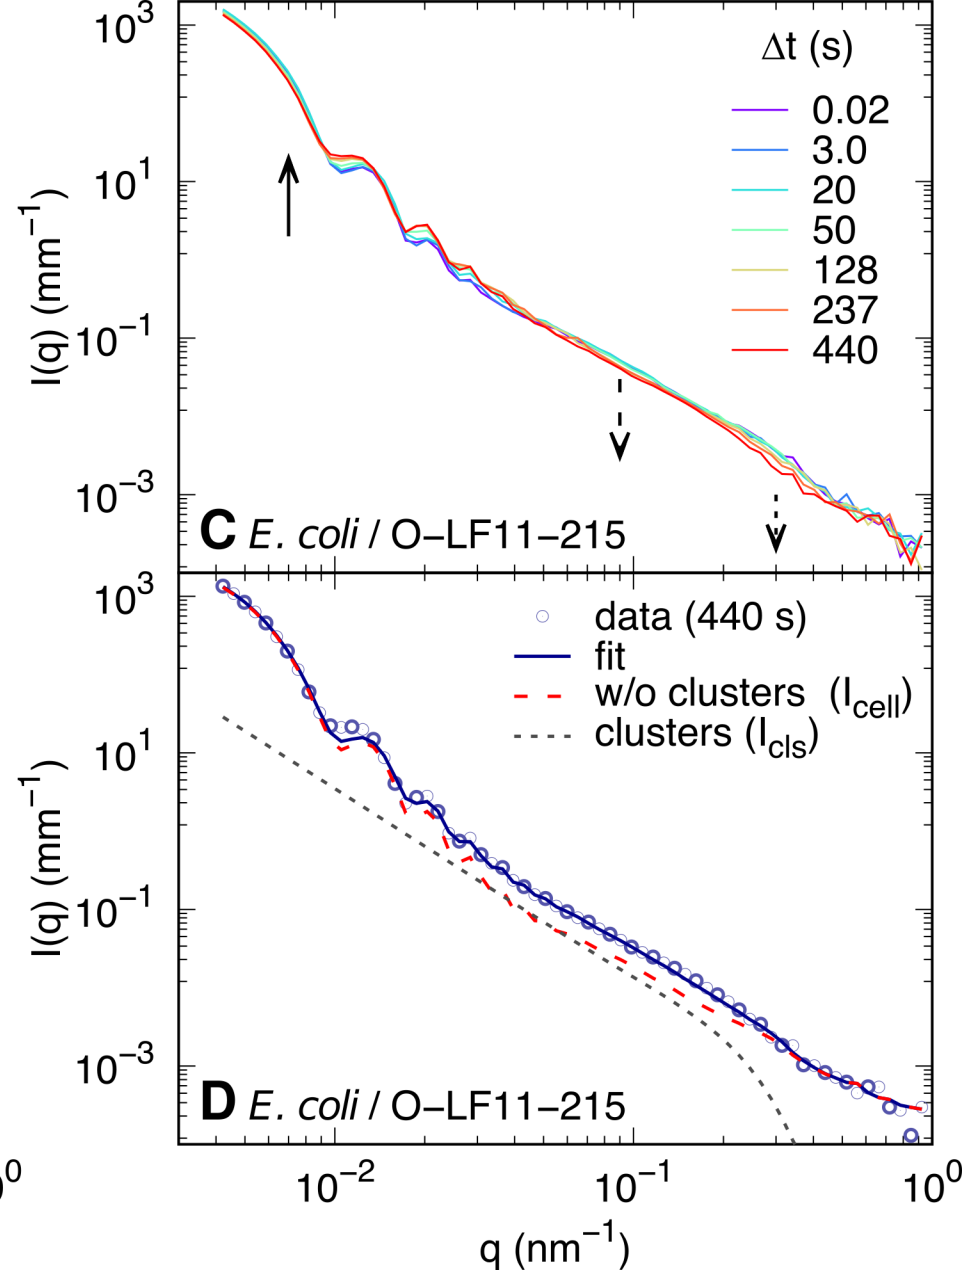

# LF11-215

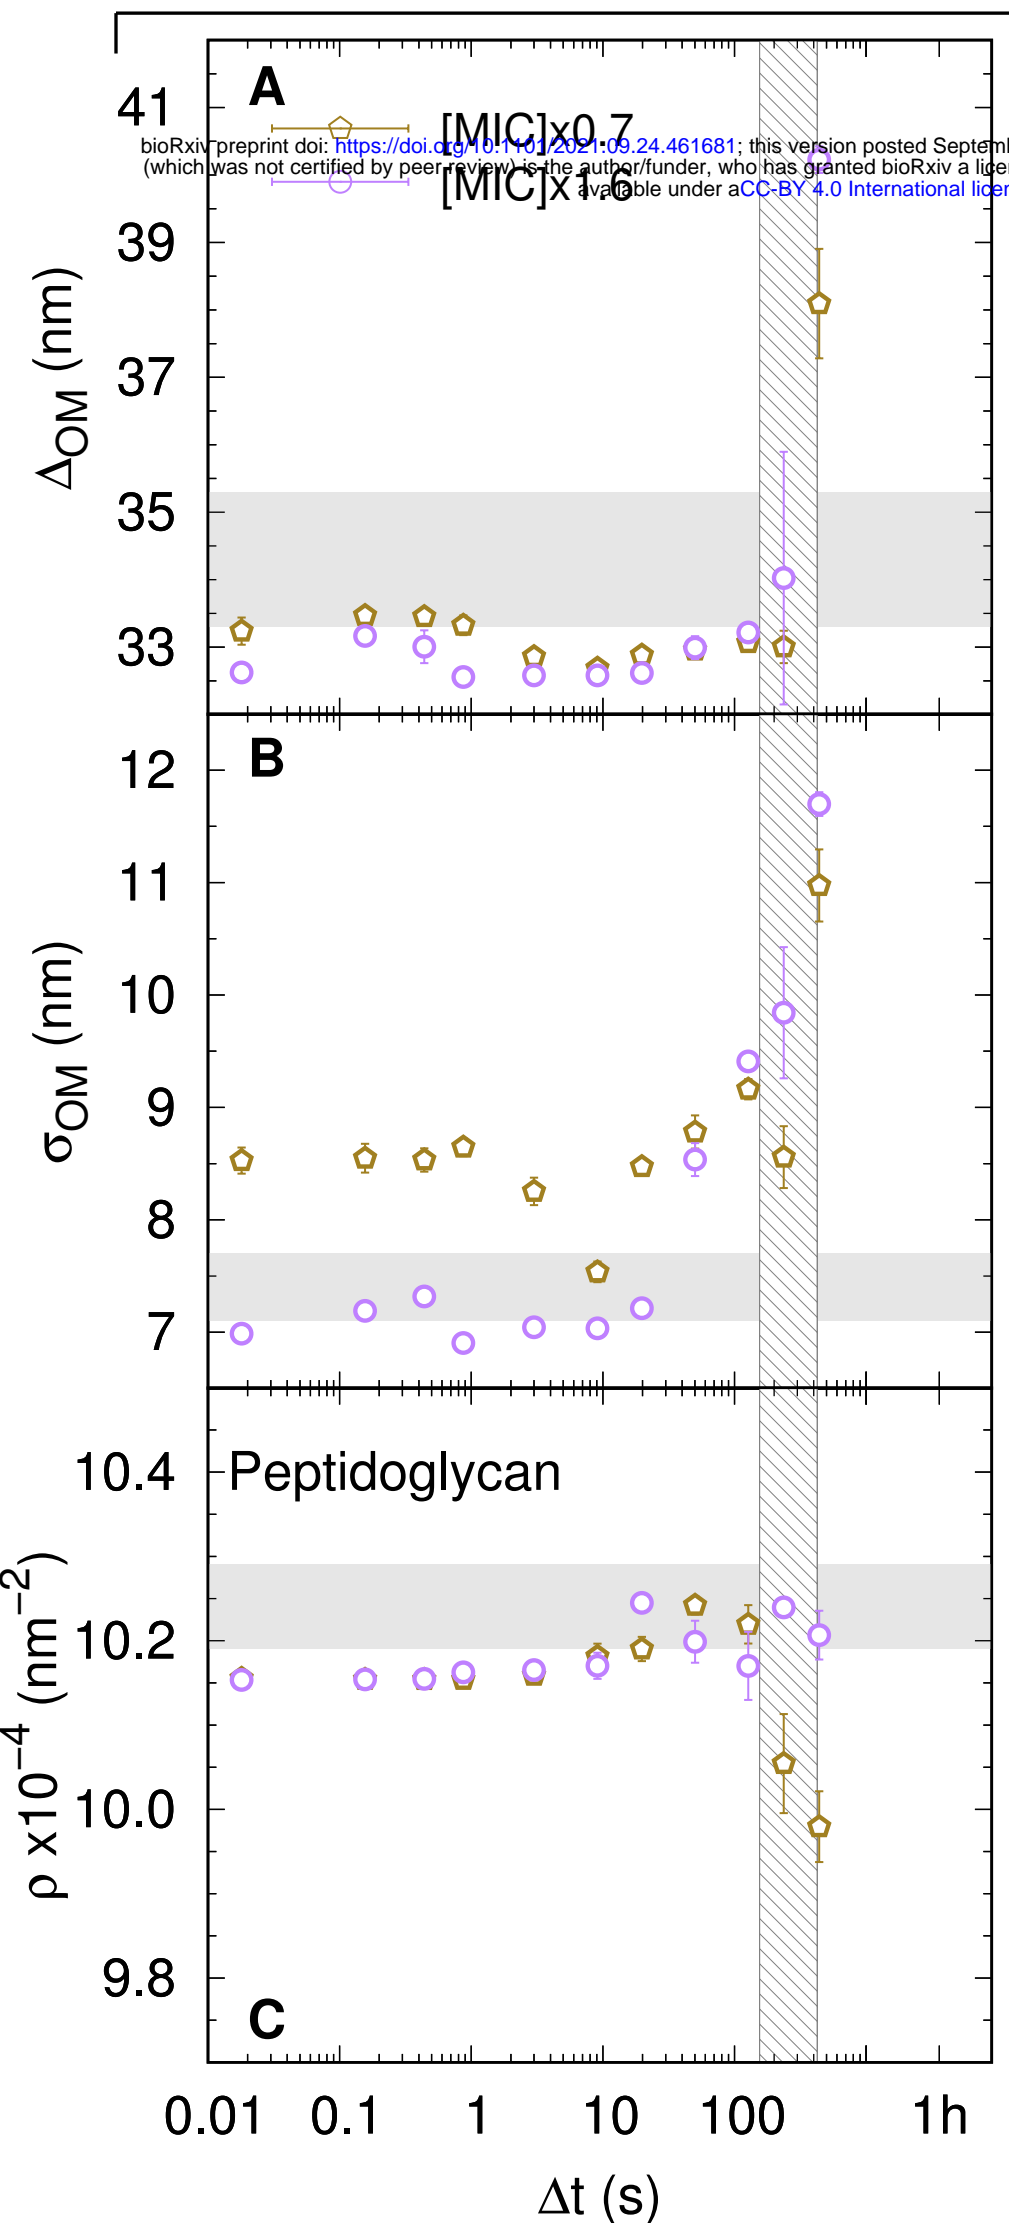

# O-LF11-215

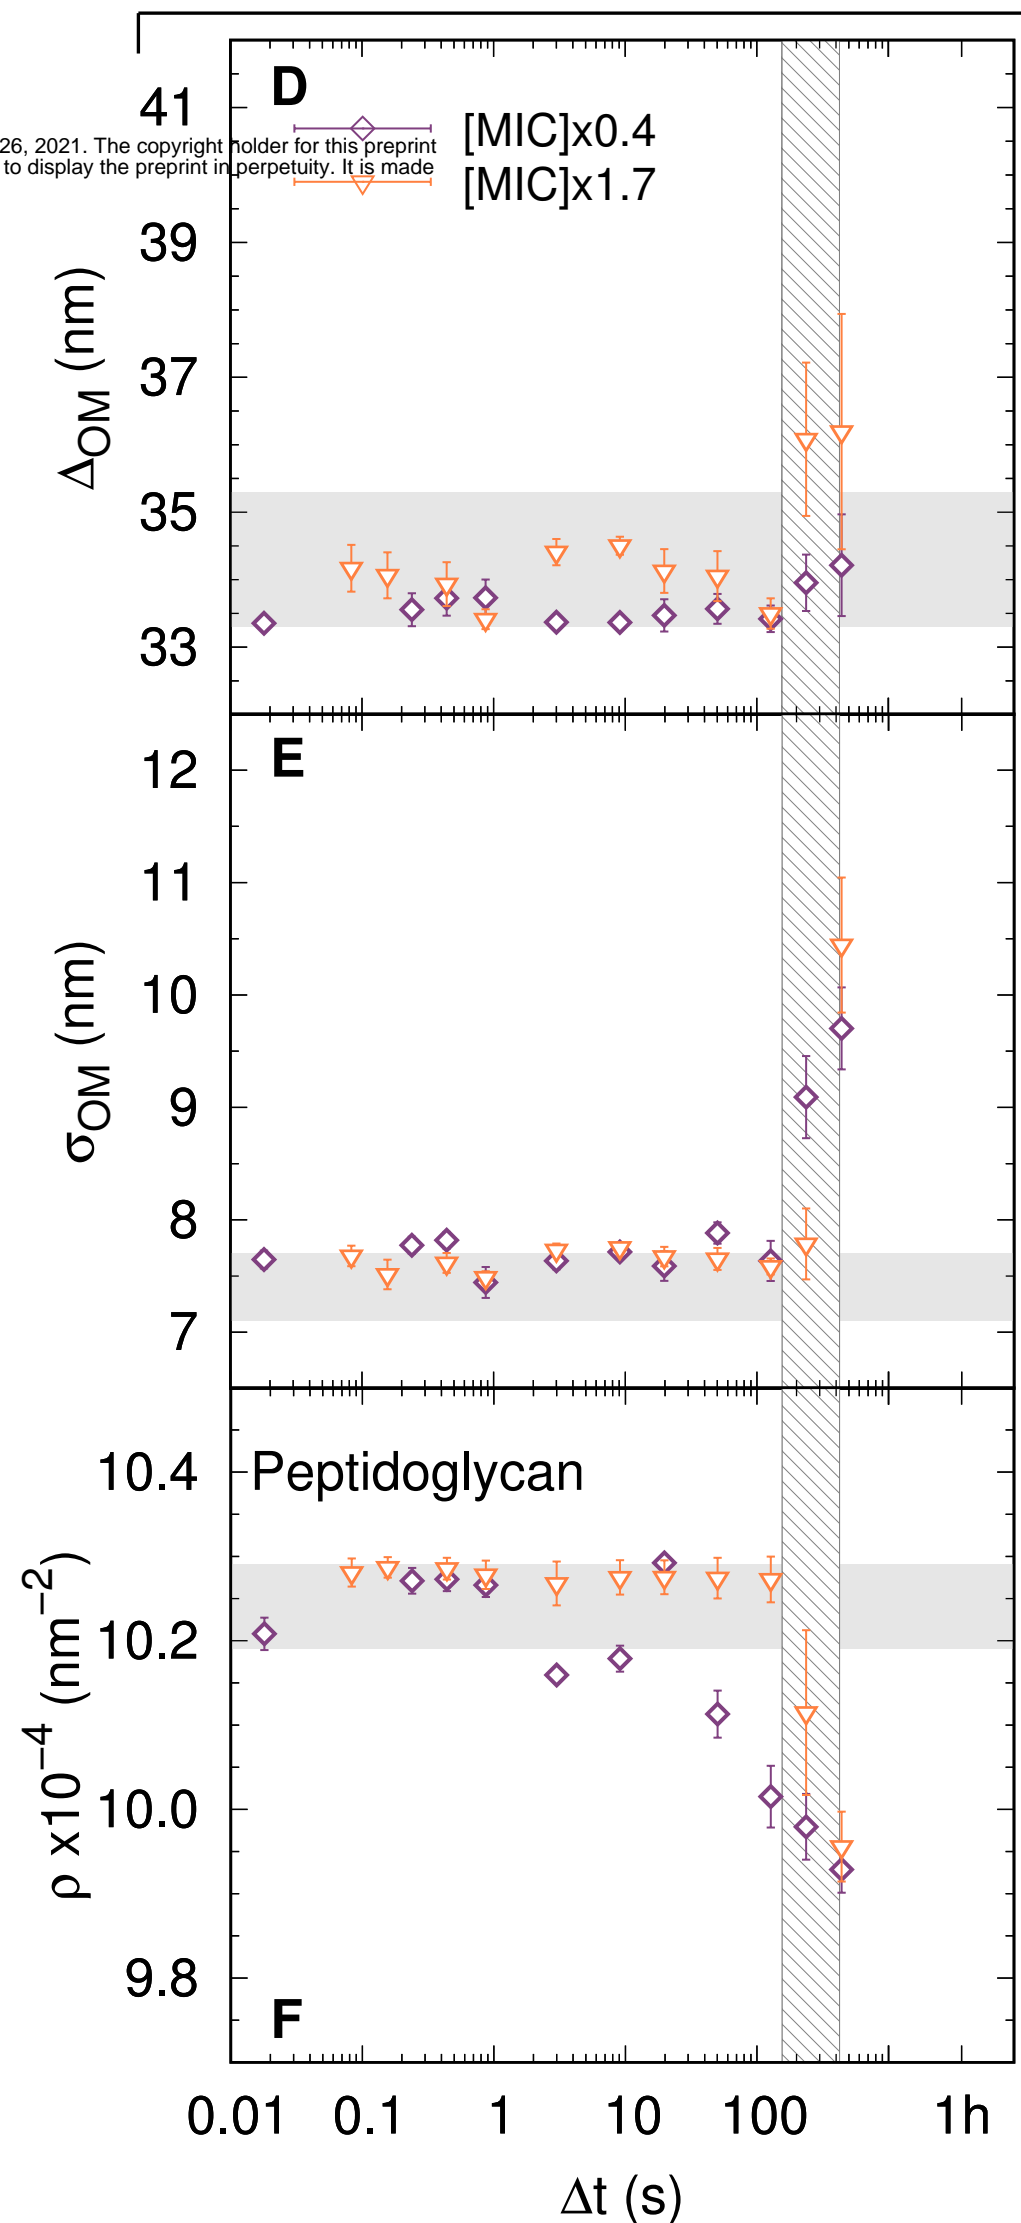

# LF11-215

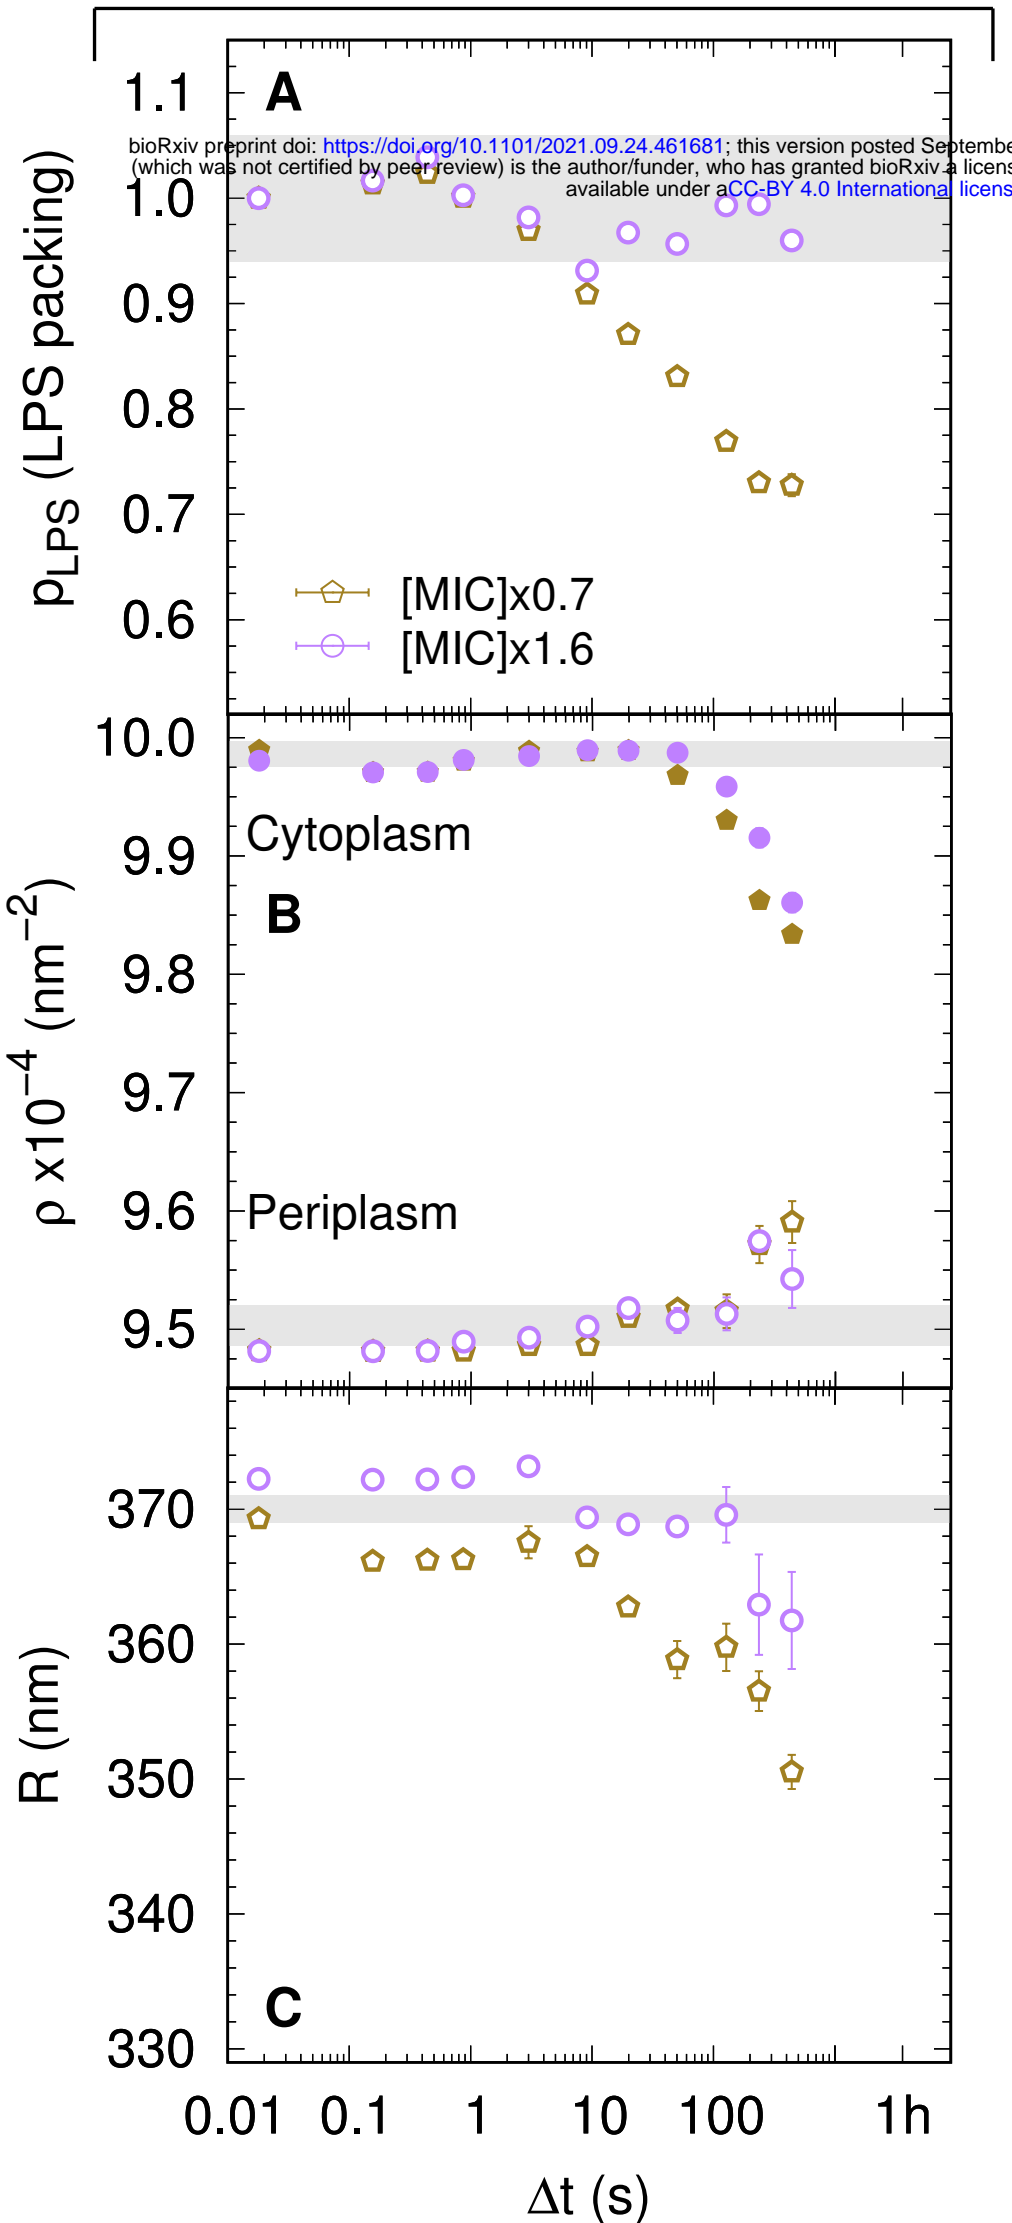



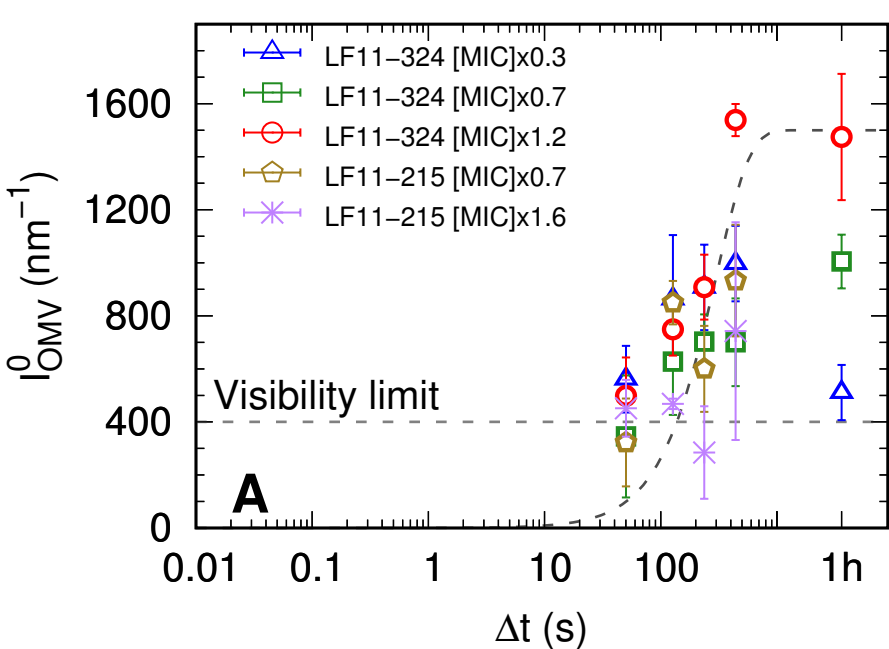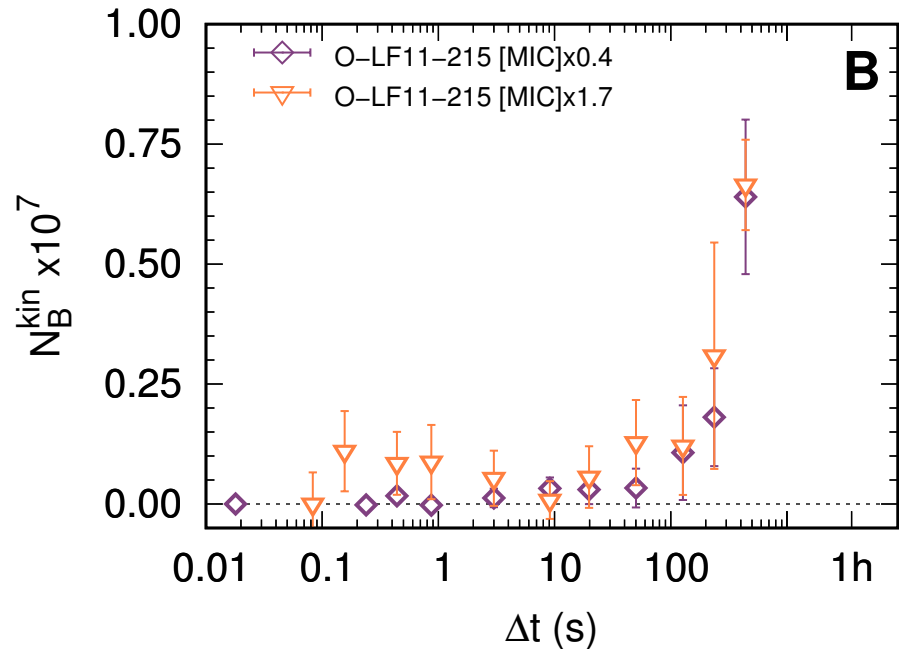

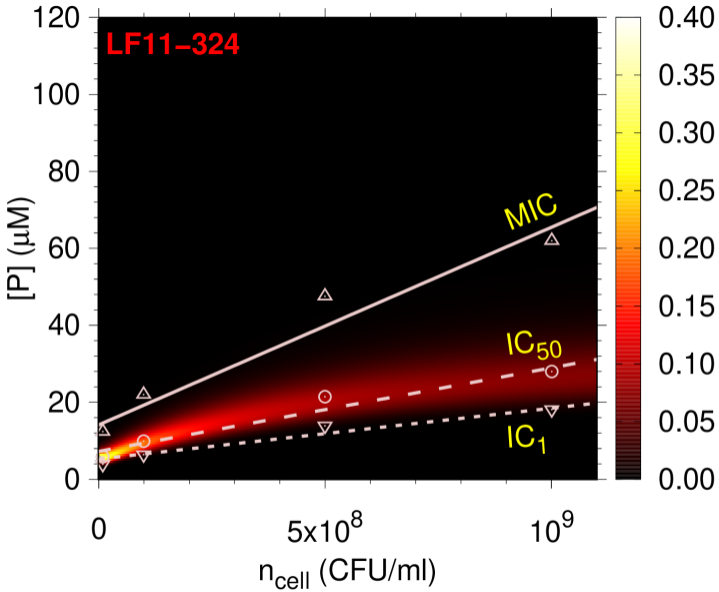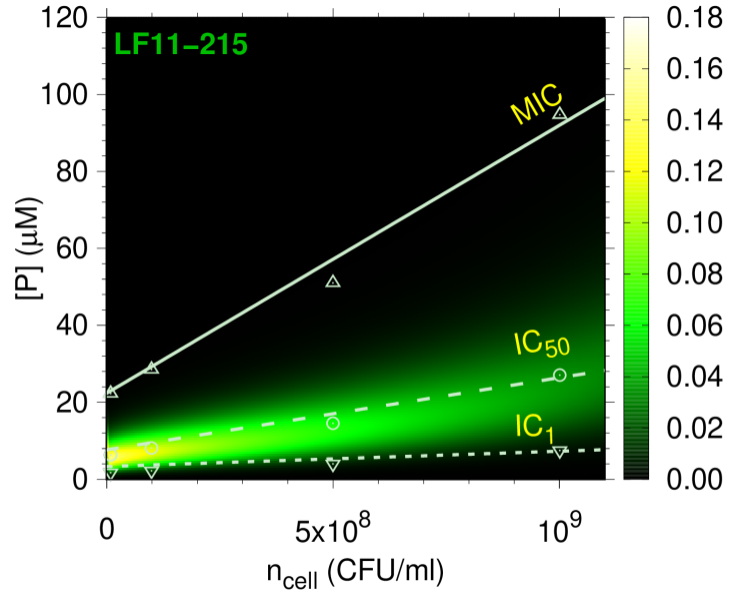

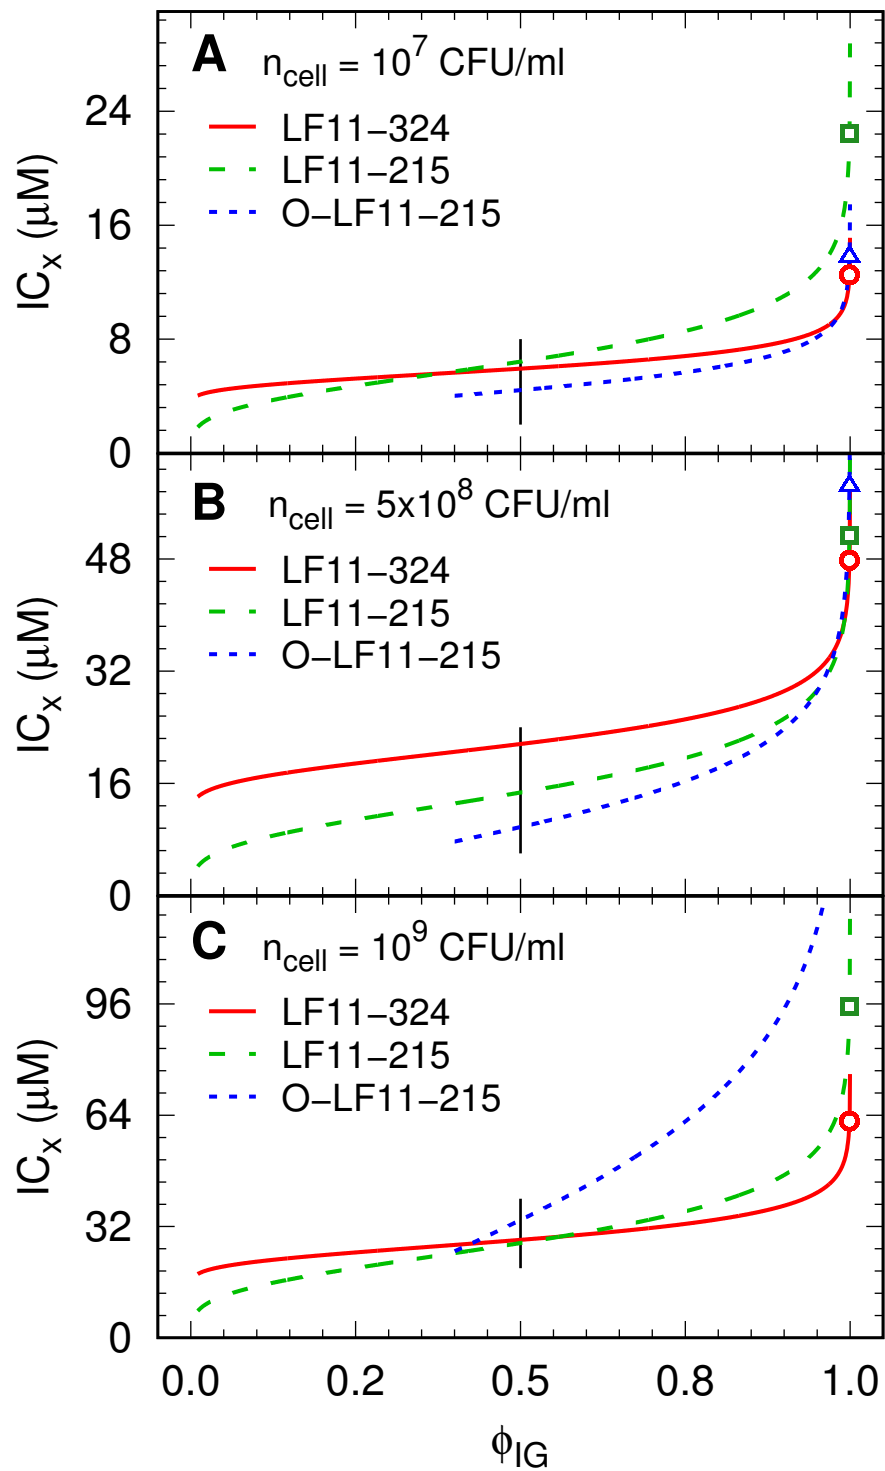

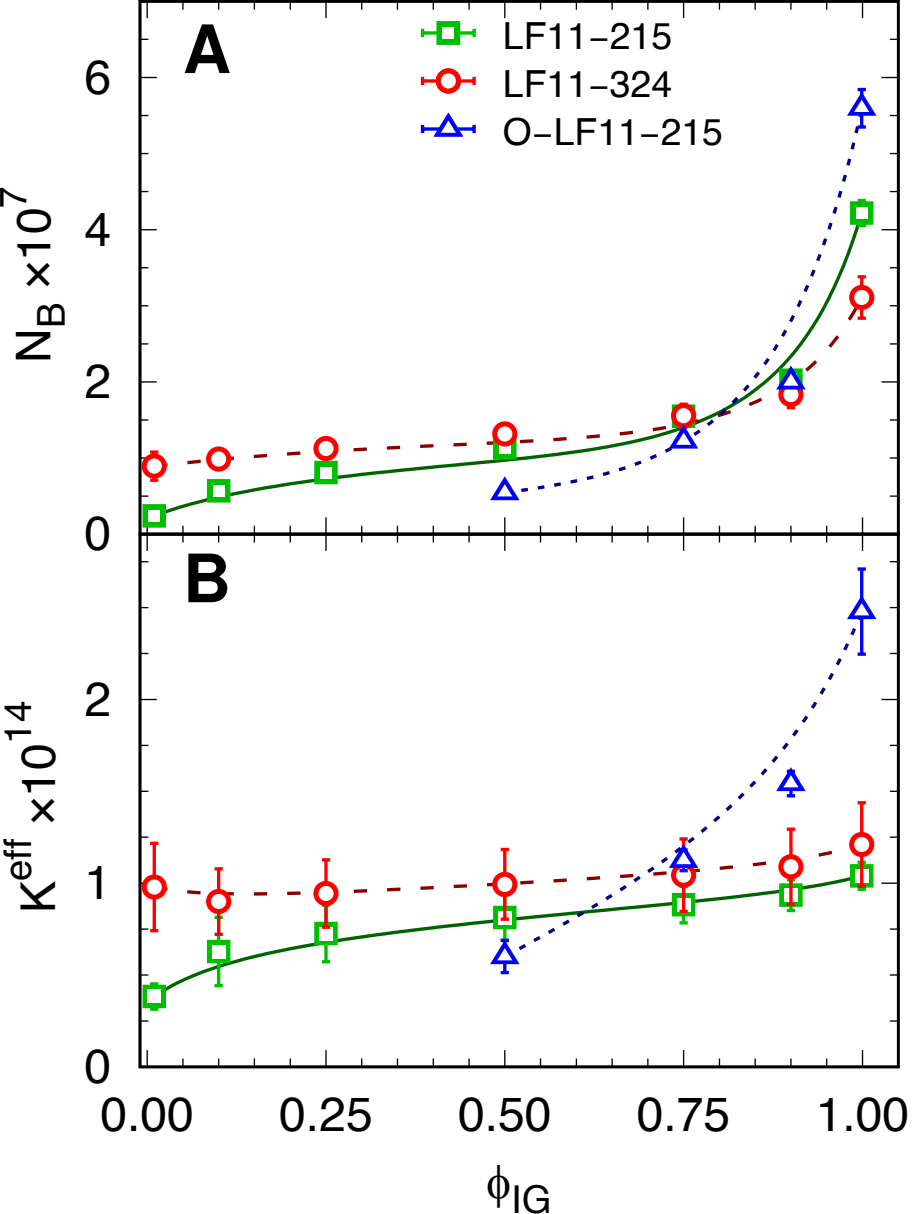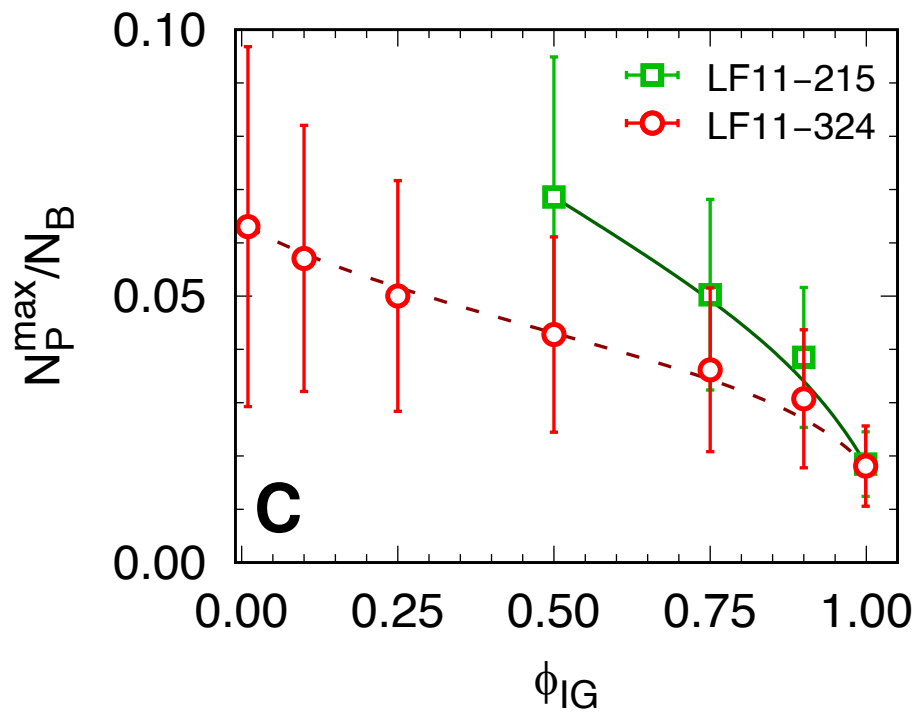

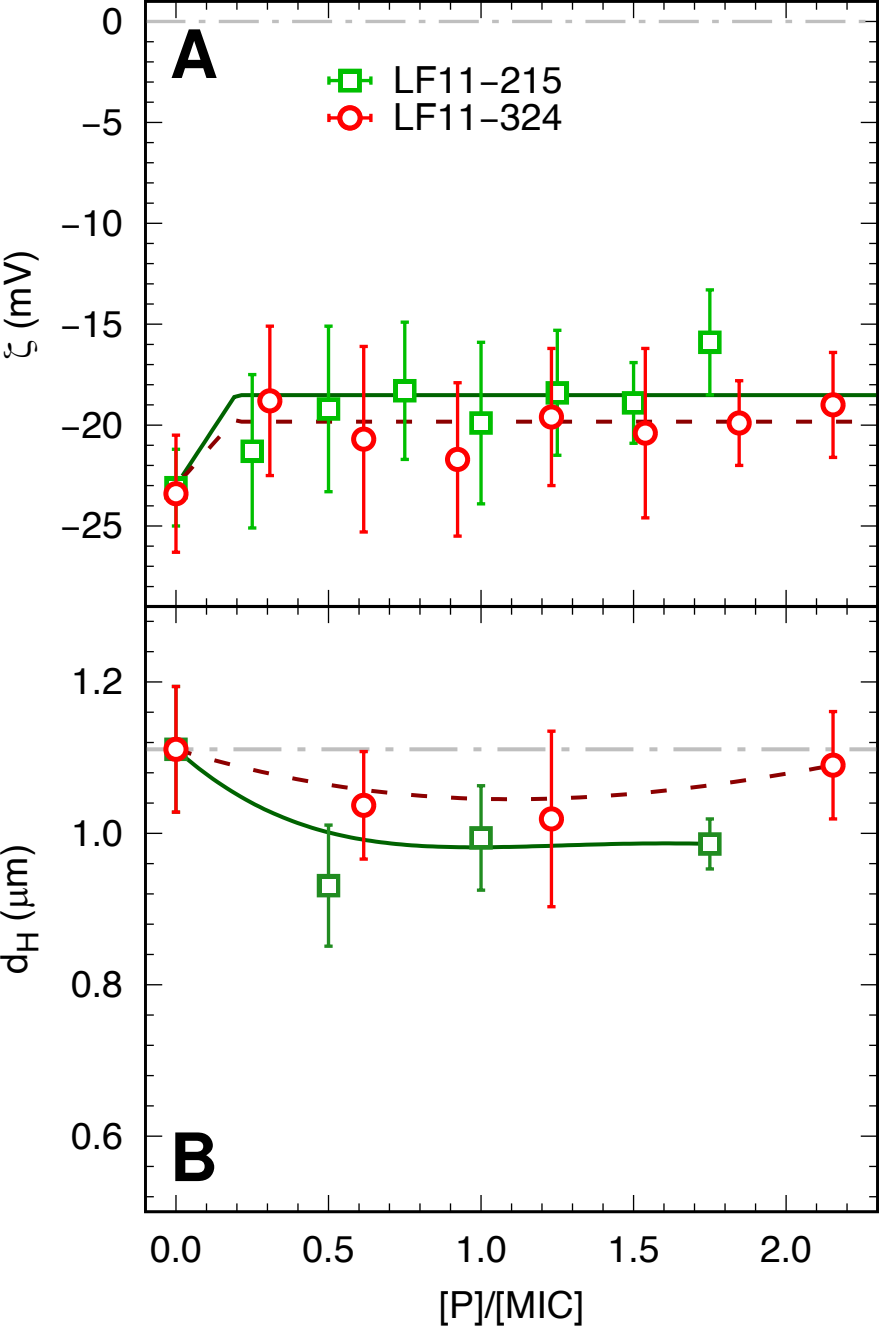

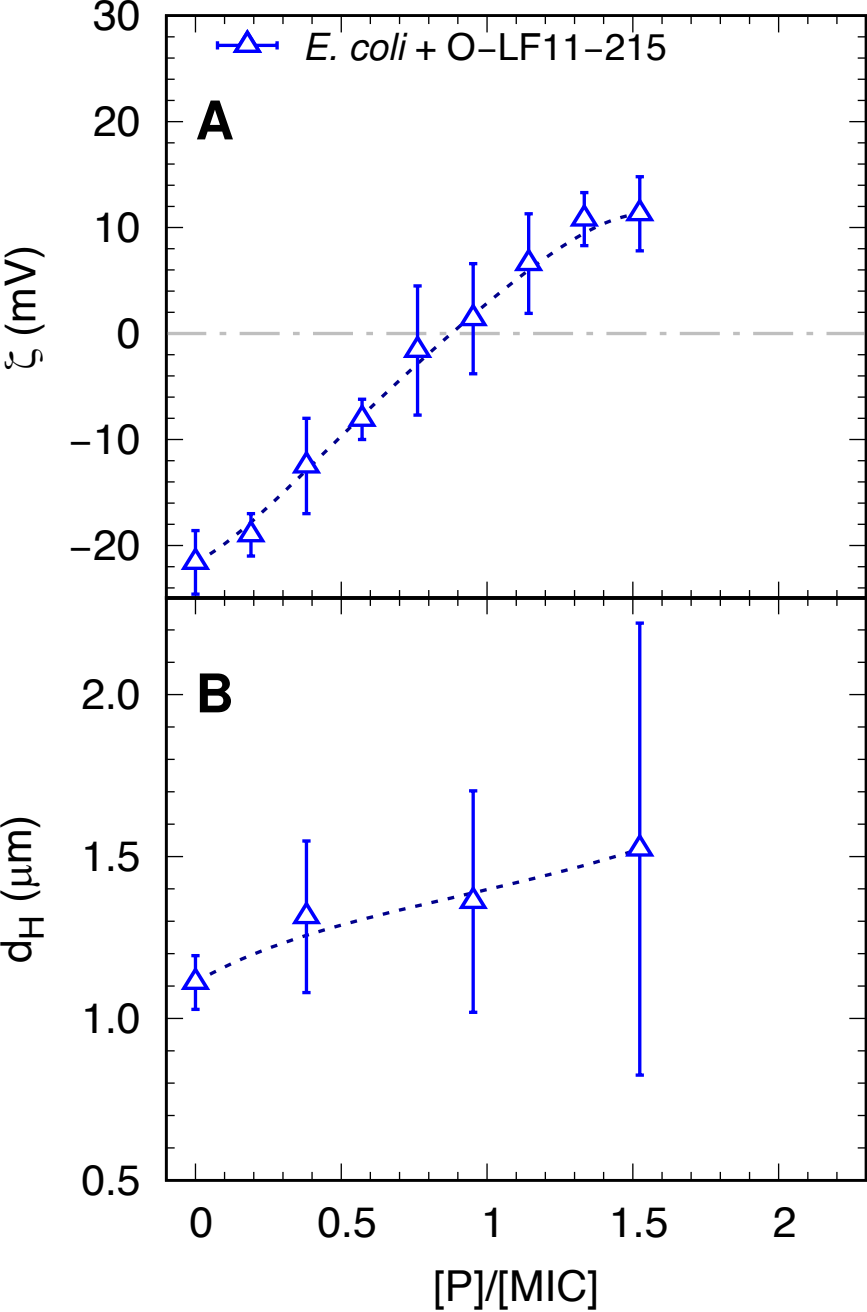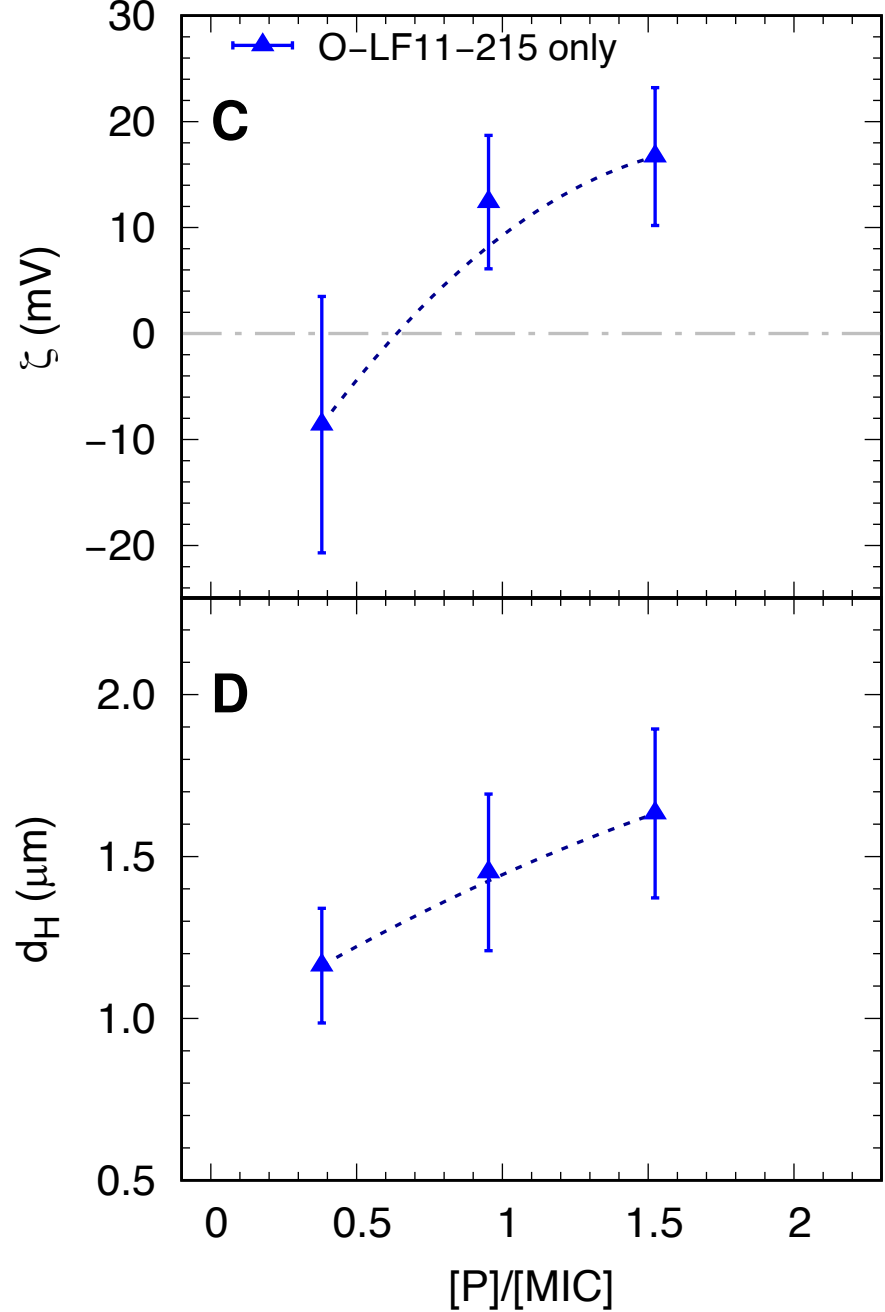



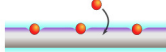

**Outer leaflet saturation**

$\Delta t < 3$  s

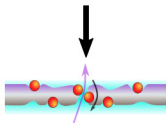

**Translocation & leakage events**

from  $\Delta t < 3$  s to  $\Delta t \sim 10$  min

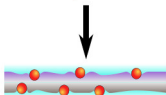

**Saturation of both membranes**

$\Delta t$  (n.d.)

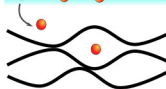

**Loss of LPS packing**

$\Delta t \sim 10$  s

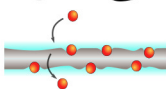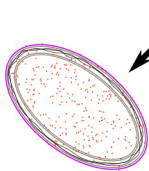

**Saturation of the cytoplasm**

from  $\Delta t \sim 5$  min to  $\Delta t < 1$  h

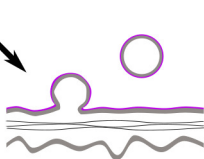

**Membrane vesicle formation**

$\Delta t > 10$  s

**Membrane detachment and waving**

$\Delta t = 2$ -5 min

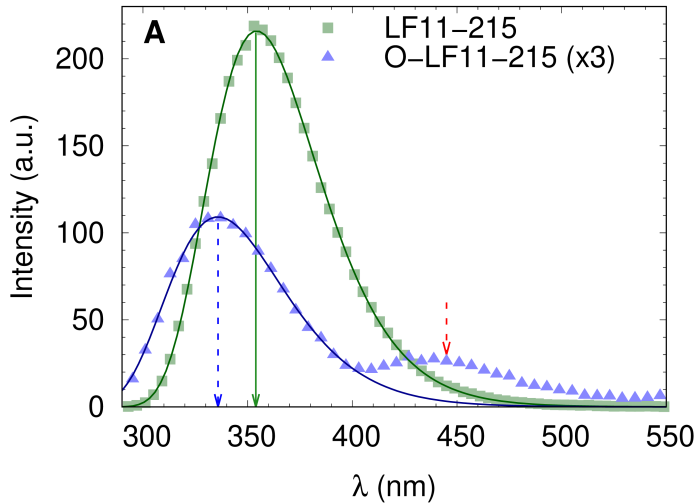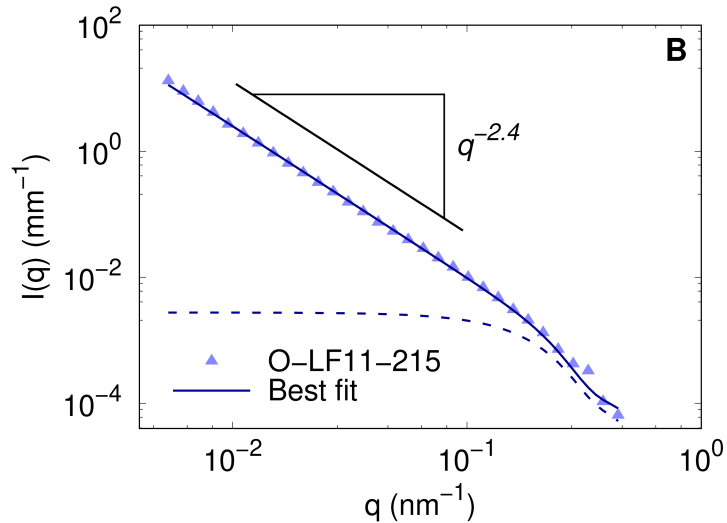

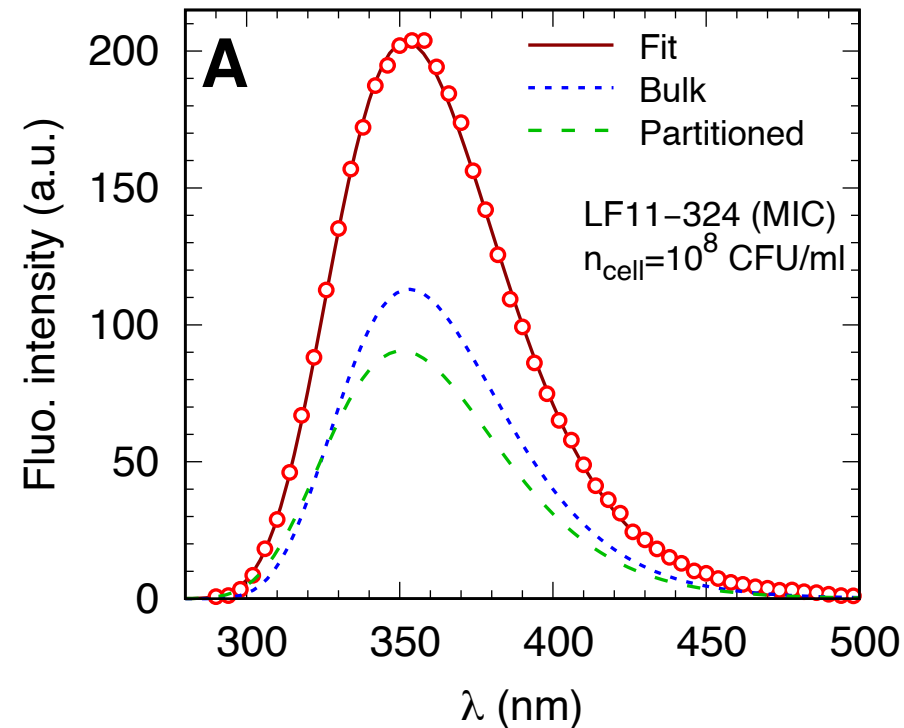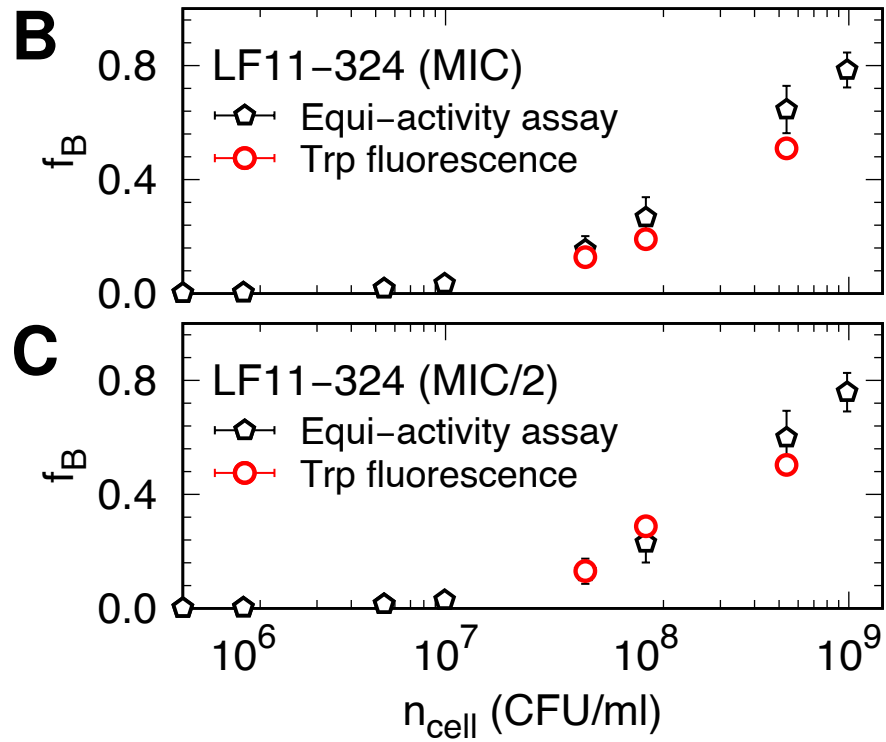

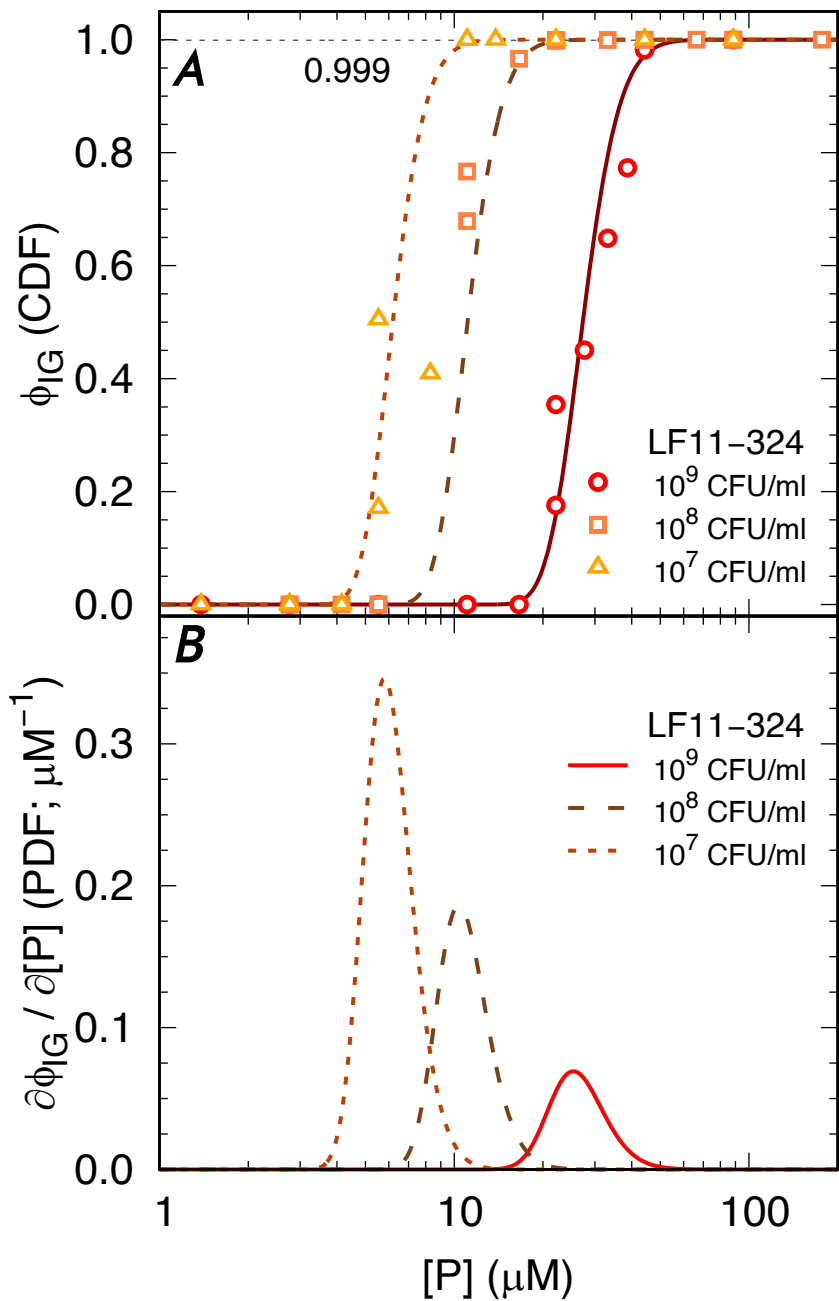

Source: http://biorxiv.org/content/10.1101/2021.09.24.461681v1.full.pdf
